# Supplementary material for: Genetic Identity, Diversity, and Population Structure of CIP's Sweetpotato (I. batatas) Germplasm Collection
Source: Front Plant Sci. 2021 Oct 28;12:660012. doi: 10.3389/fpls.2021.660012 (PMC8589021; doi:10.3389/fpls.2021.660012)
Supplement: Supplementary file 6 [file Table_1.xlsx]

## Sheet: Sheet1
Accession number	Accession number_	DOI	Collecting number / Breeder code	Accession name	Acquisition date	Country of origin - acronym	Administrative subdivision 1	Biological Status CIP	Latitude	Longitude	Elevation of collecting site	Include (y) 3075	Include (y) 1550
CIP 101050.1	101050.1			101050.1	20060301	Peru		BredLine				y
CIP 105085.2	105085.2	10.18730/P79AH	PZ06.077	INIA 307;BENJAMIN	20100810	Peru		ImpVariety				y
CIP 105086.1	105086.1	10.18730/P79BJ	PZ06.085	INIA 308;ARNE	20100810	Peru		ImpVariety				y
CIP 105228.1	105228.1	10.18730/P79CK	PZ06.226	INIA 309;ADRIANO	20100810	Peru		ImpVariety				y
CIP 105240.1	105240.1	10.18730/P79DM	PZ06.273	INIA 310;ALEXANDER	20100810	Peru		ImpVariety				y
CIP 187003.1	187003.1	10.18730/P79JS	ST87.070	NACIONAL	19950000	Peru		ImpVariety				y
CIP 187012.12	187012.12	10.18730/P79W=	ME 12	Alto Urubamba	19930000	Peru		ImpVariety				y
CIP 187015.1	187015.1	10.18730/P79KT	LM89.119	COMENSAL	19950000	Peru		ImpVariety
CIP 187016.1	187016.1	10.18730/P79MV	ST87.117	CAPLINA	19950000	Peru		ImpVariety				y
CIP 187016.2	187016.2	10.18730/P79NW	LM89.125	COSTANERO	19950000	Peru		ImpVariety				y
CIP 187016.3	187016.3	10.18730/P6C15	TN89.315	TN89.315	19960000	Peru		BredLine				y
CIP 187017.1	187017.1	10.18730/P79PX	TN88.105	SALYBORO	19950000	Peru		ImpVariety				y
CIP 187018.1	187018.1	10.18730/P79QY	TN89.316	YARADA	19950000	Peru		ImpVariety				y
CIP 187019.1	187019.1	10.18730/P79RZ	TN89.131	TACNA	19950000	Peru		ImpVariety				y
CIP 187020.1	187020.1	10.18730/P79S*	TN89.125	ATACAMA	19950000	Peru		ImpVariety				y
CIP 188006.1	188006.1	10.18730/P79Z1	SR88.050	CANETANO-INIA	19920000	Peru		ImpVariety				y
CIP 188022.1	188022.1	10.18730/P79HR	TN91.002	UNTACIP	19960000	Peru		ImpVariety				y
CIP 189014.2	189014.2	10.18730/P6BS$		MC88.016	19990000	Peru		BredLine
CIP 192033.5	192033.5	10.18730/P79EN	1498.031		20020000	Peru		ImpVariety
CIP 400001	400001	10.18730/2BWQ	INTA 9	Morada Inta	19880512	Argentina		ImpVariety				y
CIP 400002	400002	10.18730/2BXR	DLP 613	Morado	19850915	Ecuador	Manabi	LandRace	0.50 S	80.40 W	10
CIP 400004	400004	10.18730/2BYS	INIVIT 104	CEMSA 74-228	19940201	Cuba		ImpVariety
CIP 400005	400005	10.18730/P7GY2	INIVIT 105	CEMSA 78-326	19940201	Cuba		ImpVariety				y
CIP 400006	400006	10.18730/2BZT	DLP 3189	Wild Slip		Jamaica	Maschester	LandRace	18.02 N	77.30 W	618
CIP 400009	400009	10.18730/2C2X	NIAR 221	221	19910928	Mexico		LandRace
CIP 400010	400010	10.18730/2C3Y	NIAR 226	226	19910928	Mexico		LandRace				y	y
CIP 400011	400011	10.18730/2C4Z	BRA Santo Amaro	Santo Amaro	19900809	Brazil		LandRace
CIP 400012	400012	10.18730/2C5*	BRA Vicosa	Vicosa	19900809	Brazil		LandRace
CIP 400013	400013	10.18730/2C6~	I00092	PI 308208	19910927	Colombia		LandRace
CIP 400014	400014	10.18730/2C7$	I00055	Camote Amarillo	19910927	USA		LandRace
CIP 400015	400015	10.18730/2C8=	CNPH 1	Brazlandia Roxa	19911216	Brazil	Brasilia D.f.	ImpVariety			1094
CIP 400016	400016	10.18730/2C9U	CNPH 4	Brazlandia Branca	19911216	Brazil	Brasilia D.f.	ImpVariety			1094
CIP 400017	400017	10.18730/2CA0	CNPH 3	Princesa	19911216	Brazil	Brasilia D.f.	ImpVariety			1094	y
CIP 400018	400018	10.18730/2CB1	CNPH 10	Coquinho	19911216	Brazil		ImpVariety				y
CIP 400019	400019	10.18730/2CC2	PI 508513	Simon 1	19910927	Brazil		ImpVariety
CIP 400020	400020	10.18730/2CD3	I01388	No 2743	19930515	Venezuela		LandRace
CIP 400021	400021	10.18730/2CE4	I01374	Col. 1403	19910927	Ecuador		LandRace
CIP 400022	400022	10.18730/P7GZ3	INIVIT 106	CEMSA Yabu-8	19940201	Cuba		ImpVariety				y
CIP 400023	400023	10.18730/2CF5	I01436	Col. 633	19910927	Guatemala		LandRace				y	y
CIP 400024	400024	10.18730/2CG6	SVG 1	Barbados	19930920	Vatican City State		LandRace
CIP 400025	400025	10.18730/2CH7	SVG 24	LOVERs NAME	19930920	Vatican City State		LandRace
CIP 400026	400026	10.18730/2CJ8	SVG 26	Rhode Vine	19930920	Vatican City State		LandRace				y	y
CIP 400027	400027	10.18730/P7A02	CNPH 9	Brazlandia Rosada	19911216	Brazil	Brasilia D.f.	ImpVariety			1094
CIP 400028	400028	10.18730/2CK9	SOSA V-09	Violaceo (Puerto Rico)	19871125	Dominican Republic		LandRace				y
CIP 400029	400029	10.18730/2CMA	SOSA 26	Tela de Cebolla	19871125	Dominican Republic		LandRace
CIP 400030	400030	10.18730/2CNB	PRYAN 1	Brasilera	19930601	Paraguay	Central	LandRace	0.00	0.00	224
CIP 400031	400031	10.18730/2CPC	DLP 4232	Yety Manduvi	19900508	Paraguay	Pdte Hayes	LandRace	24.05 S	59.10 W	117	y	y
CIP 400032	400032	10.18730/2CQD	DLP 5207	Yety Aba		Paraguay	Misiones	LandRace	26.49 S	56.54 W	150	y	y
CIP 400033	400033	10.18730/2CRE	DLP 5265	Batata Abobora		Brazil	Mato Grosso Sur	LandRace	23.57 S	55.02 W	360
CIP 400034	400034	10.18730/2CSF	CESDA 63	Unknown	19860812	Dominican Republic		LandRace
CIP 400035	400035	10.18730/2CTG	RCB IF- 5	IAC-85-17	19850927	Brazil		BredLine
CIP 400036	400036	10.18730/P79V$	INIVIT 255	CEMSA 78-354	19940619	Cuba		ImpVariety
CIP 400037	400037		INIVIT 359	CEMSA 85-48	19940619	Cuba		ImpVariety				y
CIP 400038	400038		INIVIT1739	INIVIT B-88	19940619	Cuba		Bredline				y
CIP 400039	400039	10.18730/2CVH	DOM 10-C-1	10-C-1	19901130	Dominican Republic		BredLine
CIP 400041	400041	10.18730/2CXK	DLP 3246	UWI-JAM 2	19880300	Jamaica	Catherin	Bredline	18.00 N	77.00 W	11	y
CIP 400042	400042	10.18730/2CYM	CATIE 8464	Wenhdll	19860618	Argentina	cuman	LandRace			459
CIP 400043	400043	10.18730/2CZN	CATIE 8465	Brasilera Blanca	19860618	Argentina		LandRace
CIP 400044	400044	10.18730/2D0P	DLP 3320	Criolla Colorada		Argentina	Stgo Del Estero	LandRace	27.50 S	63.40 W	180
CIP 400048	400048	10.18730/2D1Q	DLP 3973	Colorada	19920401	Argentina	Corrientes	LandRace	27.30 S	58.50 W	61
CIP 400049	400049	10.18730/2D2R	DLP 3974	Blanca	19920401	Argentina	Corrientes	LandRace	27.30 S	58.50 W	61	y	y
CIP 400050	400050	10.18730/2D3S	DLP 3975	Brasilera	19920401	Argentina	Corrientes	LandRace	27.30 S	58.50 W	61
CIP 400051	400051	10.18730/2D4T	DLP 3977	Blanca		Argentina	Corrientes	LandRace	27.20 S	58.50 W	97
CIP 400052	400052	10.18730/2D5V	DLP 3978	Batata Papa	19920401	Argentina	Corrientes	LandRace	27.20 S	58.50 W	97
CIP 400053	400053	10.18730/2D6W	DLP 3979	Batata Papa	19920401	Argentina	Corrientes	LandRace	27.30 S	58.35 W	63
CIP 400054	400054	10.18730/2D7X	DLP 3998	Blanca Narino	19920401	Argentina	Corrientes	LandRace	28.10 S	58.50 W	64
CIP 400055	400055	10.18730/2D8Y	DLP 3999	Amarilla Vallejos	19920401	Argentina	Corrientes	LandRace	28.10 S	58.50 W	64
CIP 400056	400056	10.18730/2D9Z	DLP 4002	Nina San Miguel	19920401	Argentina	Corrientes	LandRace	28.10 S	58.50 W	64
CIP 400057	400057	10.18730/2DA*	DLP 4006	Blanca	19920401	Argentina	Corrientes	LandRace	28.30 S	59.05 W	40
CIP 400058	400058	10.18730/2DB~	DLP 4008	Batata Papa o Bola	19920401	Argentina	Corrientes	LandRace	28.28 S	59.05 W	40
CIP 400059	400059	10.18730/2DC$	DLP 4010	Blanca	19920401	Argentina	Corrientes	LandRace	28.28 S	59.05 W	40
CIP 400060	400060	10.18730/2DD=	DLP 4013	Coloroda	19920401	Argentina	Corrientes	LandRace	28.26 S	59.05 W	40
CIP 400061	400061	10.18730/2DEU	DLP 4016	Blanca Palomita	19920401	Argentina	Corrientes	LandRace	27.50 S	57.35 W	75
CIP 400062	400062	10.18730/2DF0	DLP 4017	unknown	19920401	Argentina	Corrientes	LandRace	27.50 S	57.35 W	75	y
CIP 400064	400064	10.18730/2DG1	DLP 4019	unknown	19920401	Argentina	Corrientes	LandRace	27.50 S	57.35 W	75
CIP 400068	400068	10.18730/2DH2	DLP 4024	Remolacha	19920401	Argentina	Corrientes	LandRace	27.50 S	57.35 W	75	y
CIP 400069	400069	10.18730/2DJ3	DLP 4025	unknown	19920401	Argentina	Corrientes	LandRace	27.50 S	57.35 W	75	y	y
CIP 400070	400070	10.18730/2DK4	DLP 4026	Yetimandio	19920401	Argentina	Corrientes	LandRace	27.50 S	57.35 W	75
CIP 400071	400071	10.18730/2DM5	DLP 4029	Blanca	19920401	Argentina	Corrientes	LandRace	28.02 S	57.40 W	71
CIP 400072	400072	10.18730/2DN6	DLP 4030	unknown	19920401	Argentina	Corrientes	LandRace	28.02 S	57.40 W	71	y
CIP 400073	400073	10.18730/2DP7	DLP 4035	Bolivar	19920401	Argentina	Corrientes	LandRace	28.15 S	57.58 W	180
CIP 400074	400074	10.18730/2DQ8	DLP 4040	Blanca	19920401	Argentina	Misiones	LandRace	27.30 S	55.35 W	120
CIP 400075	400075	10.18730/2DR9	DLP 4042	Batata Mani	19920401	Argentina	Misiones	LandRace	27.30 S	55.35 W	130	y	y
CIP 400076	400076	10.18730/2DSA	DLP 4047	Blanca	19920401	Argentina	Misiones	LandRace	27.20 S	55.30 W	120	y	y
CIP 400077	400077	10.18730/2DTB	DLP 4048	Colorada	19920401	Argentina	Misiones	LandRace	27.20 S	55.30 W	120	y	y
CIP 400078	400078	10.18730/2DVC	DLP 4050	Rosada	19920401	Argentina	Misiones	LandRace	27.40 S	55.40 W	255
CIP 400079	400079	10.18730/2DWD	DLP 4055	Zanahoria	19920401	Argentina	Misiones	LandRace	27.40 S	55.40 W	255
CIP 400080	400080	10.18730/2DXE	DLP 4056	Pata De Gallina	19920401	Argentina	Misiones	LandRace	27.40 S	55.40 W	255	y	y
CIP 400081	400081	10.18730/2DYF	DLP 4065	Yety Carai	19920401	Argentina	Misiones	LandRace	27.12 S	54.56 W	417
CIP 400082	400082	10.18730/2DZG	DLP 4066	Yety Manio	19920401	Argentina	Misiones	LandRace	27.12 S	54.56 W	417	y	y
CIP 400083	400083	10.18730/2E0H	DLP 4070	Yety Carau Guazu	19920401	Argentina	Misiones	LandRace	27.30 S	54.40 W	310	y	y
CIP 400084	400084	10.18730/2E1J	DLP 4071	Yety Carai	19920401	Argentina	Misiones	LandRace	27.30 S	54.40 W	130
CIP 400085	400085	10.18730/2E2K	DLP 4076	Blanco	19920401	Argentina	Misiones	LandRace	26.15 S	54.40 W	817
CIP 400087	400087	10.18730/2E3M	DLP 4081	Colorada	19920401	Argentina	Misiones	LandRace	26.10 S	54.40 W	760	y	y
CIP 400088	400088	10.18730/2E4N	DLP 4083	Batata Tallo Blanco	19920401	Argentina	Misiones	LandRace	26.06 S	54.45 W	760
CIP 400089	400089	10.18730/2E5P	DLP 4087	Rosada	19920401	Argentina	Misiones	LandRace	26.04 S	54.45 W	760
CIP 400090	400090	10.18730/2E6Q	DLP 4088	Blanca	19920401	Argentina	Misiones	LandRace	26.04 S	54.45 W	760
CIP 400091	400091	10.18730/2E7R	DLP 4089	Brazo de Negro	19920401	Argentina	Misiones	LandRace	26.04 S	54.45 W	760
CIP 400092	400092	10.18730/2E8S	DLP 4090	unknown	19920401	Argentina	Misiones	LandRace	26.04 S	54.45 W	760	y
CIP 400093	400093	10.18730/2E9T	DLP 4098	unknown	19920401	Argentina	Misiones	LandRace	26.30 S	54.30 W	266
CIP 400094	400094	10.18730/2EAV	DLP 4100	Yety Moro	19920401	Argentina	Misiones	LandRace	26.22 S	53.50 W	760	y	y
CIP 400095	400095	10.18730/2EBW	DLP 4101	Yety Guazu	19920401	Argentina	Misiones	LandRace	26.22 S	53.50 W	760	y
CIP 400096	400096	10.18730/2ECX	DLP 4103	Yety Carai	19920401	Argentina	Misiones	LandRace	26.22 S	53.50 W	760	y	y
CIP 400097	400097	10.18730/2EDY	DLP 4104	Yety Vira	19920401	Argentina	Misiones	LandRace	26.22 S	53.50 W	760
CIP 400098	400098	10.18730/2EEZ	DLP 4114	Yety Pyta	19920401	Argentina	Misiones	LandRace	27.02 S	55.03 W	185
CIP 400099	400099	10.18730/2EF*	DLP 4115	Yety Pyta-i	19920401	Argentina	Misiones	LandRace	27.02 S	55.03 W	185
CIP 400100	400100	10.18730/2EG~	DLP 4117	Pata De Rana	19920401	Argentina	Misiones	LandRace	27.02 S	55.03 W	185
CIP 400101	400101	10.18730/2EH$	DLP 4118	unknown	19920401	Argentina	Misiones	LandRace	27.02 S	55.03 W	185
CIP 400102	400102	10.18730/2EJ=	DLP 4119	Yety Carau	19920401	Argentina	Misiones	LandRace	27.02 S	55.03 W	185	y
CIP 400103	400103	10.18730/2EKU	DLP 4124	Senorita	19920401	Argentina	Misiones	LandRace	26.59 S	55.08 W	189
CIP 400104	400104	10.18730/2EM0	DLP 4126	unknown	19920401	Argentina	Misiones	LandRace	26.59 S	55.08 W	189
CIP 400105	400105	10.18730/2EN1	DLP 4130	unknown	19920401	Argentina	Misiones	LandRace	27.15 S	55.30 W	167
CIP 400106	400106	10.18730/2EP2	DLP 4131	Amarilla	19920401	Argentina	Corrientes	LandRace	27.20 S	58.20 W	69	y
CIP 400107	400107	10.18730/2EQ3	DLP 4133	unknown	19920401	Argentina	Corrientes	LandRace	27.20 S	58.20 W	69
CIP 400108	400108	10.18730/2ER4	DLP 4139	Cubano	19920401	Argentina	Chaco	LandRace	26.50 S	59.08 W	120
CIP 400109	400109	10.18730/2ES5	DLP 4140	unknown	19920401	Argentina	Chaco	LandRace	26.50 S	59.08 W	120
CIP 400110	400110	10.18730/2ET6	DLP 4142	Cubana	19920401	Argentina	Chaco	LandRace	26.35 S	59.23 W	584
CIP 400111	400111	10.18730/2EV7	INTA 1	Px 8326 A.jones Selection	19880512	Argentina		BredLine
CIP 400112	400112	10.18730/2EW8	INTA 2	TIS 2544 IITA Selection	19880512	Argentina		BredLine
CIP 400113	400113	10.18730/2EX9	INTA 3	TIS IITA Selection	19880512	Argentina		BredLine				y
CIP 400114	400114	10.18730/2EYA	INTA 4	Morada Hoja Entera	19880512	Argentina		LandRace
CIP 400115	400115	10.18730/2EZB	INTA 5	SM A 421 San Pedro Select	19880512	Argentina		BredLine
CIP 400116	400116	10.18730/2F0C	INTA 6	PX A 562 San Pedro Select	19880512	Argentina		BredLine
CIP 400117	400117	10.18730/2F1D	INTA 7	SM A 2341 San Pedro Selec	19880512	Argentina		BredLine				y
CIP 400118	400118	10.18730/2F2E	INTA 8	TIB9(86-1) IITA Selection	19880512	Argentina		BredLine				y
CIP 400119	400119	10.18730/2F3F	INTA 10	TIB9(86-2) IITA Selection	19880512	Argentina		BredLine				y
CIP 400120	400120	10.18730/2F4G	INTA 11	TIB9(86-3) IITA Selection	19880512	Argentina		BredLine				y
CIP 400121	400121	10.18730/2F5H	INTA 12	XP 4 A. Jones Selection	19880512	Argentina		BredLine				y
CIP 400122	400122	10.18730/2F6J	INTA 13	Clon 202 Criolla Colorada	19880512	Argentina		LandRace
CIP 400123	400123	10.18730/2F7K	INTA 14	SM A 2342 San Pedro Selec	19880512	Argentina		BredLine				y
CIP 400124	400124	10.18730/2F8M	INTA 15	TIB 2532 Iita Selection	19880512	Argentina		BredLine
CIP 400125	400125	10.18730/2F9N	INTA 16	Blanca de Brasil	19880512	Argentina		LandRace					y
CIP 400126	400126	10.18730/2FAP	INTA 17	SM A 43 San Pedro Select	19880512	Argentina		BredLine
CIP 400127	400127	10.18730/2FBQ	INTA 18	TIB 10 IITA Selection	19880512	Argentina		BredLine
CIP 400128	400128	10.18730/2FCR	INTA 20	Famailla 6(Folquer Selec)	19880512	Argentina	Tucuman	BredLine			322
CIP 400129	400129	10.18730/2FDS	INTA 21	Morada INTA - Mutacion	19880512	Argentina		BredLine				y
CIP 400130	400130	10.18730/2FET	INTA 22	Bolivar	19880512	Argentina		LandRace
CIP 400131	400131	10.18730/2FFV	INTA 23	Morada	19880512	Argentina		LandRace
CIP 400138	400138	10.18730/2FGW	UNT 6	Brasilera Blanca	19880512	Argentina	Tucumam	LandRace	26.50 S	65.00 W	459
CIP 400139	400139	10.18730/2FHX	UNT 7	Cuello Rosado Pipo	19880512	Argentina	Tucumam	LandRace	26.50 S	65.00 W	459
CIP 400141	400141	10.18730/2FJY	UNT 10	Tis-s/n	19880512	Argentina	Tucumam	BredLine	26.50 S	65.00 W	459
CIP 400142	400142	10.18730/2FKZ	UNT 12	Rojo Blanco	19880512	Argentina	Tucumam	LandRace	26.50 S	65.00 W	459
CIP 400143	400143	10.18730/2FM*	UNT 16	Seedling 15	19880512	Argentina	Tucumam	BredLine	26.50 S	65.00 W	459	y
CIP 400145	400145	10.18730/2FP$	DLP 1325	Blanco		Bolivia	La Paz	LandRace	16.10 S	67.50 W	3865
CIP 400146	400146	10.18730/2FQ=	DLP 1327	Huila Apichu		Bolivia	La Paz	LandRace	16.10 S	67.50 W	4054	y	y
CIP 400147	400147	10.18730/2FRU	DLP 1328	Apichu Amarillo		Bolivia	La Paz	LandRace	16.10 S	67.50 W	4054	y
CIP 400148	400148	10.18730/2FS0	DLP 1330	Apichu Rojo		Bolivia	La Paz	LandRace	16.08 S	67.50 W	3397	y	y
CIP 400149	400149	10.18730/2FT1	DLP 1331	unknown		Bolivia	La Paz	LandRace	16.30 S	67.30 W	1494
CIP 400150	400150	10.18730/2FV2	DLP 1332	unknown		Bolivia	La Paz	LandRace	16.30 S	67.30 W	1494
CIP 400151	400151	10.18730/2FW3	DLP 1333	unknown		Bolivia	La Paz	LandRace	16.30 S	67.30 W	1494	y	y
CIP 400152	400152	10.18730/2FX4	DLP 1334	Guindo		Bolivia	La Paz	LandRace	16.20 S	67.30 W	1500
CIP 400154	400154	10.18730/2FY5	DLP 1347	Camote		Bolivia	Cochabamba	LandRace	17.40 S	66.20 W	2633
CIP 400155	400155	10.18730/2FZ6	DLP 1348	Rojo		Bolivia	Cochabamba	LandRace	17.40 S	66.20 W	2633
CIP 400156	400156	10.18730/2G07	DLP 1349	Amarillo		Bolivia	Cochabamba	LandRace	17.40 S	66.20 W	2633
CIP 400157	400157	10.18730/2G18	DLP 1350	Amarillo		Bolivia	Cochabamba	LandRace	17.40 S	66.20 W	2633	y
CIP 400158	400158	10.18730/2G29	DLP 1351	Morado		Bolivia	Cochabamba	LandRace	17.40 S	66.20 W	2633
CIP 400159	400159	10.18730/2G3A	DLP 1352	Guindo		Bolivia	Cochabamba	LandRace	17.40 S	66.20 W	2633
CIP 400160	400160	10.18730/2G4B	DLP 1353	Rosado		Bolivia	Cochabamba	LandRace	17.40 S	66.20 W	2633
CIP 400161	400161	10.18730/2G5C	DLP 1354	Amarillo		Bolivia	Cochabamba	LandRace	17.10 S	65.30 W	490	y	y
CIP 400162	400162	10.18730/2G6D	DLP 1355	Blanco Papa		Bolivia	Cochabamba	LandRace	17.05 S	65.40 W	205
CIP 400163	400163	10.18730/2G7E	DLP 1356	Peruano		Bolivia	Cochabamba	LandRace	17.15 S	65.40 W	201
CIP 400164	400164	10.18730/2G8F	DLP 1359	Rosado		Bolivia	Cochabamba	LandRace	17.00 S	65.40 W	2727
CIP 400165	400165	10.18730/2G9G	DLP 1360	unknown		Bolivia	Cochabamba	LandRace	17.00 S	65.40 W	210
CIP 400166	400166	10.18730/2GAH	DLP 1362	Blanco		Bolivia	Cochabamba	LandRace	17.00 S	65.40 W	210
CIP 400167	400167	10.18730/2GBJ	DLP 1363	Amarillo		Bolivia	Cochabamba	LandRace	16.45 S	65.35 W	400
CIP 400168	400168	10.18730/2GCK	DLP 1366	Cruzena		Bolivia	Chuquisaca	LandRace	18.40 S	64.50 W	1490	y
CIP 400169	400169	10.18730/2GDM	DLP 1368	Morado		Bolivia	Chuquisaca	LandRace	18.40 S	64.50 W	1490
CIP 400170	400170	10.18730/2GEN	DLP 1370	Apichu		Bolivia	Chuquisaca	LandRace	18.40 S	64.50 W	2336	y	y
CIP 400171	400171	10.18730/2GFP	DLP 1372	Amarillo		Bolivia	Chuquisaca	LandRace	18.50 S	64.55 W	2494
CIP 400172	400172	10.18730/2GGQ	DLP 1373	unknown		Bolivia	Chuquisaca	LandRace	18.50 S	64.55 W	2494
CIP 400173	400173	10.18730/2GHR	DLP 1374	unknown		Bolivia	Chuquisaca	LandRace	18.50 S	64.55 W	2494	y	y
CIP 400174	400174	10.18730/2GJS	DLP 1375	unknown		Bolivia	Chuquisaca	LandRace	18.50 S	64.55 W	2494
CIP 400175	400175	10.18730/2GKT	DLP 1376	Morado		Bolivia	Chuquisaca	LandRace	18.50 S	64.55 W	2494
CIP 400176	400176	10.18730/2GMV	DLP 1377	Oglliri o Camote Humedo		Bolivia	Chuquisaca	LandRace	19.20 S	65.10 W	1434
CIP 400177	400177	10.18730/2GNW	DLP 1378	Aguela Manuchia		Bolivia	Chuquisaca	LandRace	19.10 S	65.10 W	1434
CIP 400178	400178	10.18730/2GPX	DLP 1379	Morado		Bolivia	Chuquisaca	LandRace	19.10 S	65.10 W	1434
CIP 400179	400179	10.18730/2GQY	DLP 1380	Oriental		Bolivia	Chuquisaca	LandRace	19.05 S	65.15 W	2355
CIP 400180	400180	10.18730/2GRZ	DLP 1381	Quebradeno		Bolivia	Chuquisaca	LandRace	18.50 S	64.50 W	2336
CIP 400181	400181	10.18730/2GS*	DLP 1382	Amarillo		Bolivia	Chuquisaca	LandRace	19.05 S	65.15 W	2355
CIP 400182	400182	10.18730/2GT~	DLP 1383	Blanco Pintado		Bolivia	Chuquisaca	LandRace	19.05 S	65.15 W	2355
CIP 400183	400183	10.18730/2GV$	DLP 1384	Amarillo		Bolivia	Chuquisaca	LandRace	19.05 S	65.15 W	2355
CIP 400184	400184	10.18730/2GW=	DLP 1386	Morado		Bolivia	La Paz	LandRace	16.40 S	68.10 W	2627	y	y
CIP 400185	400185	10.18730/2GXU	DLP 1387	Blanco		Bolivia	La Paz	LandRace	16.45 S	68.15 W	2627	y	y
CIP 400186	400186	10.18730/2GY0	DLP 1600	Amarillo		Bolivia	Andres Ibanes	LandRace	17.40 S	63.05 W	460
CIP 400187	400187	10.18730/2GZ1	DLP 1602	Brasilero		Bolivia	Andres Ibanes	LandRace	17.06 S	63.07 W	500
CIP 400188	400188	10.18730/2H02	DLP 1612	Blanco		Bolivia	Ichilo	LandRace	17.28 S	63.20 W	300	y	y
CIP 400189	400189	10.18730/2H13	DLP 1613	Morada		Bolivia	Ichilo	LandRace	0.00 S	63.20 W	315	y	y
CIP 400190	400190	10.18730/2H24	DLP 1618	Colorado		Bolivia	Cordillera	LandRace	18.02 S	65.52 W	474
CIP 400191	400191	10.18730/2H35	DLP 1619	Blanco		Bolivia	Cordillera	LandRace	18.02 S	65.52 W	474
CIP 400192	400192	10.18730/2H46	DLP 1621	Morado		Bolivia	Cordillera	LandRace	18.10 S	63.52 W	438
CIP 400193	400193	10.18730/2H57	DLP 1622	Amarilla		Bolivia	Cordillera	LandRace	18.10 S	63.52 W	438
CIP 400194	400194	10.18730/2H68	DLP 1625	Blanco		Bolivia	Cordillera	LandRace	18.55 S	63.10 W	953
CIP 400195	400195	10.18730/2H79	DLP 1626	Japones		Bolivia	Cordillera	LandRace	18.55 S	63.10 W	953
CIP 400196	400196	10.18730/2H8A	DLP 1627	Ojiri		Bolivia	Cordillera	LandRace	18.56 S	63.12 W	635
CIP 400197	400197	10.18730/2H9B	DLP 1633	Del Morado		Bolivia	Andres Ibanez	LandRace	17.52 S	63.12 W	588	y	y
CIP 400198	400198	10.18730/2HAC	DLP 1634	Camirino		Bolivia	Andres Ibanez	LandRace	17.54 S	63.14 W	410	y	y
CIP 400199	400199	10.18730/2HBD	DLP 1635	Corridor		Bolivia	Andres Ibanez	LandRace	17.55 S	63.14 W	400
CIP 400200	400200	10.18730/2HCE	DLP 1636	Blanco		Bolivia	Andres Ibanez	LandRace	17.58 S	63.15 W	528
CIP 400201	400201	10.18730/2HDF	DLP 1637	Morado		Bolivia	Andres Ibanez	LandRace	18.00 S	63.17 W	422
CIP 400202	400202	10.18730/2HEG	DLP 1638	Japones		Bolivia	Andres Ibanez	LandRace	18.00 S	63.18 W	422
CIP 400203	400203	10.18730/2HFH	DLP 1649	Blanco		Bolivia	Nor Yungas	LandRace	15.30 S	67.28 W	4084	y	y
CIP 400204	400204	10.18730/2HGJ	DLP 1650	Rosado		Bolivia	Nor Yungas	LandRace	15.28 S	67.26 W	4572	y	y
CIP 400205	400205	10.18730/2HHK	DLP 1652	Morado		Bolivia	Alto Beni	LandRace	15.30 S	67.30 W	280	y	y
CIP 400206	400206	10.18730/2HJM	DLP 1653	Rosado		Bolivia	Alto Beni	LandRace	15.28 S	67.30 W	390	y	y
CIP 400207	400207	10.18730/2HKN	DLP 1658	Camote Blanco		Bolivia	Sur Yungas	LandRace	15.28 S	67.26 W	400
CIP 400208	400208	10.18730/2HMP	DLP 1659	Morado		Bolivia	Alto Beni	LandRace	15.31 S	67.27 W	440
CIP 400211	400211	10.18730/2HNQ	DLP 1666	Blanco		Bolivia	Nor Yungas	LandRace	15.38 S	67.35 W	990	y
CIP 400212	400212	10.18730/2HPR	DLP 1667	Amarillo		Bolivia	Nor Yungas	LandRace	15.40 S	67.35 W	1674	y	y
CIP 400213	400213	10.18730/2HQS	DLP 1668	Rojo		Bolivia	Nor Yungas	LandRace	15.42 S	67.36 W	1674
CIP 400214	400214	10.18730/2HRT	DLP 1669	Rosado		Bolivia	Nor Yungas	LandRace	15.38 S	67.26 W	1344	y
CIP 400215	400215	10.18730/2HSV	DLP 2704	Colorado		Bolivia	Tarija	LandRace	22.20 S	64.10 W	1293
CIP 400216	400216	10.18730/2HTW	DLP 2705	Batata Blanca		Bolivia	Tarija	LandRace	22.20 S	64.10 W	1293
CIP 400217	400217	10.18730/2HVX	DLP 2708	Morada		Bolivia	Tarija	LandRace	22.20 S	64.10 W	683
CIP 400218	400218	10.18730/2HWY	DLP 2721	Tarijeno		Bolivia	Tarija	LandRace	22.20 S	64.35 W	707	y	y
CIP 400219	400219	10.18730/2HXZ	DLP 2723	Carne Amarilla		Bolivia	Tarija	LandRace	22.20 S	64.35 W	707
CIP 400220	400220	10.18730/2HY*	DLP 2726	Colorada		Bolivia	Tarija	LandRace	22.10 S	63.30 W	564
CIP 400221	400221	10.18730/2HZ~	DLP 2733	Morado		Bolivia	Tarija	LandRace	22.45 S	64.15 W	1360
CIP 400222	400222	10.18730/2J0$	DLP 5264	Batata Vermella		Brazil	Mato Grosso Sur	LandRace	23.57 S	55.02 W	360	y
CIP 400223	400223	10.18730/2J1=	DPW 2543	unknown		Brazil	Mato Grosso	Landrace	15.50 S	52.40 W	380	y
CIP 400225	400225	10.18730/2J2U	DPW 2545	unknown		Brazil	Mato Grosso	Landrace	15.50 S	52.40 W	380
CIP 400226	400226	10.18730/2J30	DPW 2546	Branca		Brazil	Mato Grosso	Landrace	15.55 S	52.45 W	390	y
CIP 400227	400227	10.18730/2J41	DPW 2547	Reyna		Brazil	Mato Grosso	Landrace	15.30 S	54.05 W	469
CIP 400228	400228	10.18730/2J52	DPW 2548	Batata de Ceara		Brazil	Mato Grosso	Landrace	15.30 S	54.05 W	469	y	y
CIP 400229	400229	10.18730/2J63	DPW 2549	Batata de Ababora		Brazil	Mato Grosso	Landrace	15.30 S	54.05 W	469
CIP 400230	400230	10.18730/2J74	DPW 2550	Rio Grandense		Brazil	Mato Grosso	Landrace	15.35 S	54.40 W	120
CIP 400231	400231	10.18730/2J85	DPW 2551	Roxa		Brazil	Mato Grosso	Landrace	15.35 S	54.40 W	120
CIP 400232	400232	10.18730/2J96	DPW 2552	Branca		Brazil	Mato Grosso	Landrace	15.35 S	54.40 W	120	y	y
CIP 400233	400233	10.18730/2JA7	DPW 2555	Roxa		Brazil	Mato Grosso	Landrace	16.20 S	57.20 W	153	y	y
CIP 400234	400234	10.18730/2JB8	DPW 2556	Branca		Brazil	Mato Grosso	Landrace	16.20 S	57.20 W	153	y	y
CIP 400235	400235	10.18730/2JC9	DPW 2557	unknown		Brazil	Mato Grosso	Landrace	16.05 S	57.40 W	123	y	y
CIP 400236	400236	10.18730/2JDA	DPW 2558	unknown		Brazil	Mato Grosso	Landrace	16.05 S	57.40 W	123	y	y
CIP 400237	400237	10.18730/2JEB	DPW 2559	Roxinha		Brazil	Mato Grosso	Landrace	15.50 S	58.10 W	100	y	y
CIP 400238	400238	10.18730/2JFC	DPW 2560	Amarelha		Brazil	Mato Grosso	Landrace	15.50 S	58.10 W	100
CIP 400239	400239	10.18730/2JGD	DPW 2561	unknown		Brazil	Mato Grosso	Landrace	15.45 S	58.15 W	120	y	y
CIP 400241	400241	10.18730/2JHE	DPW 2563	Branca		Brazil	Mato Grosso	Landrace	15.40 S	58.20 W	290
CIP 400242	400242	10.18730/2JJF	DPW 2564	Roxa-roxa		Brazil	Mato Grosso	Landrace	15.40 S	58.20 W	290	y
CIP 400243	400243	10.18730/2JKG	DPW 2565	Branca		Brazil	Mato Grosso	Landrace	15.10 S	59.05 W	253
CIP 400244	400244	10.18730/2JMH	DPW 2566	Roxa		Brazil	Mato Grosso	Landrace	15.10 S	59.02 W	190
CIP 400245	400245	10.18730/2JNJ	DPW 2568	Roxa		Brazil	Mato Grosso	Landrace	13.55 S	59.32 W	460
CIP 400246	400246	10.18730/2JPK	DPW 2569	Roxa		Brazil	Mato Grosso	Landrace	13.50 S	59.40 W	320
CIP 400247	400247	10.18730/2JQM	DPW 2570	Branca		Brazil	Mato Grosso	Landrace	13.50 S	59.40 W	320	y	y
CIP 400248	400248	10.18730/2JRN	DPW 2571	Branca		Brazil	Mato Grosso	Landrace	13.45 S	59.40 W	310		y
CIP 400249	400249	10.18730/2JSP	DPW 2572	Roxa		Brazil	Mato Grosso	Landrace	13.40 S	59.40 W	360	y	y
CIP 400250	400250	10.18730/2JTQ	DPW 2573	Branca		Brazil	Mato Grosso	Landrace	13.40 S	59.40 W	360	y	y
CIP 400251	400251	10.18730/2JVR	DPW 2575	Amarelha		Brazil	Rondonia	Landrace	12.35 S	60.15 W	120
CIP 400252	400252	10.18730/2JWS	DPW 2576	Branca		Brazil	Rondonia	Landrace	12.35 S	60.15 W	120	y	y
CIP 400253	400253	10.18730/2JXT	DPW 2577	Branca		Brazil	Rondonia	Landrace	12.40 S	60.20 W	160
CIP 400254	400254	10.18730/2JYV	DPW 2578	Pe de Galinha		Brazil	Rondonia	Landrace	13.05 S	60.40 W	300	y	y
CIP 400256	400256	10.18730/2JZW	DPW 2580	Amarelha		Brazil	Rondonia	Landrace	13.05 S	60.40 W	300
CIP 400257	400257	10.18730/2K0X	DPW 2581	Branca		Brazil	Rondonia	Landrace	13.05 S	60.40 W	300
CIP 400258	400258	10.18730/2K1Y	DPW 2582	Branca		Brazil	Rondonia	Landrace	13.05 S	60.40 W	300	y
CIP 400259	400259	10.18730/2K2Z	DPW 2583	unknown		Brazil	Rondonia	Landrace	13.05 S	60.40 W	300
CIP 400260	400260	10.18730/2K3*	DPW 2584	Japones		Brazil	Rondonia	Landrace	13.00 S	60.35 W	210
CIP 400261	400261	10.18730/2K4~	DPW 2585	Italiano		Brazil	Rondonia	Landrace	13.00 S	60.35 W	210	y	y
CIP 400262	400262	10.18730/2K5$	DPW 2586	Paulista		Brazil	Rondonia	Landrace	13.00 S	60.35 W	210	y	y
CIP 400263	400263	10.18730/2K6=	DPW 2587	Bahiana		Brazil	Rondonia	Landrace	13.00 S	60.35 W	210
CIP 400264	400264	10.18730/2K7U	DPW 2588	Batata Roxa		Brazil	Rondonia	Landrace	13.40 S	61.10 W	240
CIP 400265	400265	10.18730/2K80	DPW 2589	Vermelha		Brazil	Rondonia	Landrace	13.45 S	61.15 W	179	y	y
CIP 400266	400266	10.18730/2K91	DPW 2591	Branca Douce		Brazil	Rondonia	Landrace	13.30 S	61.10 W	110	y	y
CIP 400267	400267	10.18730/2KA2	DPW 2592	Guatingha		Brazil	Rondonia	Landrace	13.21 S	61.00 W	140	y	y
CIP 400268	400268	10.18730/2KB3	DPW 2594	Vermelha		Brazil	Rondonia	Landrace	13.20 S	61.10 W	178	y	y
CIP 400269	400269	10.18730/2KC4	DPW 2595	Branca		Brazil	Rondonia	Landrace	13.20 S	61.10 W	178
CIP 400270	400270	10.18730/2KD5	DPW 2596	unknown		Brazil	Rondonia	Landrace	13.20 S	61.10 W	178	y	y
CIP 400271	400271	10.18730/2KE6	DPW 2598	Branca		Brazil	Rondonia	Landrace	13.30 S	61.13 W	120
CIP 400272	400272	10.18730/2KF7	DPW 2599	Roxa		Brazil	Rondonia	Landrace	13.30 S	61.13 W	120	y
CIP 400273	400273	10.18730/2KG8	DPW 2600	Branca		Brazil	Rondonia	Landrace	13.30 S	61.13 W	120
CIP 400274	400274	10.18730/2KH9	DPW 2601	Branca		Brazil	Rondonia	Landrace	11.40 S	61.20 W	177	y	y
CIP 400275	400275	10.18730/2KJA	DPW 2602	Roxa		Brazil	Rondonia	Landrace	11.42 S	61.20 W	130
CIP 400276	400276	10.18730/2KKB	DPW 2603	Amarelha		Brazil	Rondonia	Landrace	11.42 S	61.20 W	130
CIP 400277	400277	10.18730/2KMC	DPW 2604	Roxa		Brazil	Rondonia	Landrace	11.42 S	61.20 W	130
CIP 400278	400278	10.18730/2KND	DPW 2605	Roxa		Brazil	Rondonia	Landrace	11.40 S	61.50 W	170
CIP 400279	400279	10.18730/2KPE	DPW 2606	Branca		Brazil	Rondonia	Landrace	11.40 S	61.52 W	100
CIP 400280	400280	10.18730/2KQF	DPW 2607	Vermelha		Brazil	Rondonia	Landrace	11.40 S	61.52 W	100
CIP 400281	400281	10.18730/2KRG	DPW 2608	Reinha		Brazil	Rondonia	Landrace	11.40 S	61.54 W	160	y
CIP 400282	400282	10.18730/2KSH	DPW 2609	Branca		Brazil	Rondonia	Landrace	11.40 S	61.56 W	110
CIP 400283	400283	10.18730/2KTJ	DPW 2610	Roxa		Brazil	Rondonia	Landrace	11.40 S	61.56 W	110
CIP 400284	400284	10.18730/2KVK	DPW 2612	unknown		Brazil	Rondonia	Landrace	11.55 S	62.35 W	244
CIP 400285	400285	10.18730/2KWM	DPW 2613	Rosada		Brazil	Rondonia	Landrace	11.50 S	62.40 W	220
CIP 400286	400286	10.18730/2KXN	DPW 2614	Roxa		Brazil	Rondonia	Landrace	9.55 S	63.10 W	160
CIP 400287	400287	10.18730/2KYP	DPW 2615	Branca		Brazil	Rondonia	Landrace	9.55 S	63.10 W	160
CIP 400288	400288	10.18730/2KZQ	DPW 2616	unknown		Brazil	Rondonia	Landrace	9.40 S	63.10 W	140	y
CIP 400289	400289	10.18730/2M0R	DPW 2617	unknown		Brazil	Rondonia	Landrace	9.40 S	63.10 W	140
CIP 400291	400291	10.18730/2M1S	DPW 2622	unknown		Brazil	Rondonia	Landrace	9.13 S	63.56 W	85
CIP 400292	400292	10.18730/2M2T	DPW 2624	Douce Vermelia		Brazil	Rondonia	Landrace	9.12 S	61.55 W	112
CIP 400293	400293	10.18730/2M3V	DPW 2625	Vermelha		Brazil	Rondonia	Landrace	9.12 S	61.50 W	60	y
CIP 400294	400294	10.18730/2M4W	DPW 2626	Amarelha		Brazil	Rondonia	Landrace	9.12 S	61.52 W	126
CIP 400295	400295	10.18730/2M5X	DPW 2627	Roxa		Brazil	Rondonia	Landrace	9.12 S	61.52 W	126
CIP 400296	400296	10.18730/2M6Y	DPW 2628	Branca		Brazil	Rondonia	Landrace	9.12 S	61.40 W	101	y	y
CIP 400297	400297	10.18730/2M7Z	DPW 2629	Amarela		Brazil	Rondonia	Landrace	9.12 S	61.40 W	101
CIP 400298	400298	10.18730/2M8*	DPW 2630	Folha de Rosa		Brazil	Rondonia	Landrace	9.12 S	61.43 W	160	y	y
CIP 400299	400299	10.18730/2M9~	DPW 2631	Amarelha		Brazil	Rondonia	Landrace	9.12 S	61.43 W	160
CIP 400300	400300	10.18730/2MA$	DPW 2632	Roxinha		Brazil	Rondonia	Landrace	9.12 S	61.43 W	160
CIP 400302	400302	10.18730/2MB=	DPW 2634	unknown		Brazil	Rondonia	Landrace	9.30 S	64.10 W	120	y	y
CIP 400303	400303	10.18730/2MCU	DPW 2636	Roxa		Brazil	Rondonia	Landrace	9.38 S	64.50 W	100	y
CIP 400304	400304	10.18730/2MD0	DPW 2637	unknown		Brazil	Rondonia	Landrace	9.40 S	64.52 W	150	y	y
CIP 400305	400305	10.18730/2ME1	DPW 2638	Amarela		Brazil	Rondonia	Landrace	10.04 S	65.10 W	119
CIP 400306	400306	10.18730/2MF2	DPW 2639	unknown		Brazil	Rondonia	Landrace	10.10 S	65.10 W	200	y	y
CIP 400307	400307	10.18730/2MG3	DPW 2640	Roxa		Brazil	Rondonia	Landrace	10.40 S	65.10 W	140
CIP 400308	400308	10.18730/2MH4	DPW 2641	Roxa Pintada		Brazil	Rondonia	Landrace	10.45 S	65.05 W	190
CIP 400309	400309	10.18730/2MJ5	DPW 2642	Branca		Brazil	Rondonia	Landrace	10.45 S	65.05 W	136
CIP 400310	400310	10.18730/2MK6	DPW 2644	Amarelhina		Brazil	Rondonia	Landrace	10.42 S	65.05 W	150
CIP 400311	400311	10.18730/2MM7	DPW 2645	Roxa		Brazil	Rondonia	Landrace	10.42 S	65.05 W	150
CIP 400312	400312	10.18730/2MN8	DPW 2646	Vermelha		Brazil	Rondonia	Landrace	10.44 S	65.07 W	180
CIP 400313	400313	10.18730/2MP9	DPW 2647	Roxa		Brazil	Rondonia	Landrace	10.44 S	65.07 W	180
CIP 400314	400314	10.18730/2MQA	DPW 2648	Branca		Brazil	Rondonia	Landrace	10.45 S	65.08 W	180
CIP 400315	400315	10.18730/2MRB	DPW 2649	Roxa		Brazil	Rondonia	Landrace	10.45 S	65.08 W	180
CIP 400317	400317	10.18730/2MSC	DPW 2652	Blanco		Brazil	Amazonas	Landrace	9.05 S	63.50 W	120
CIP 400318	400318	10.18730/2MTD	DPW 2653	Branca		Brazil	Amazonas	Landrace	8.00 S	63.40 W	120	y	y
CIP 400319	400319	10.18730/2MVE	DPW 2655	Roxa		Brazil	Amazonas	Landrace	7.48 S	63.35 W	195
CIP 400320	400320	10.18730/2MWF	DPW 2656	unknown		Brazil	Amazonas	Landrace	7.20 S	63.10 W	40	y	y
CIP 400321	400321	10.18730/2MXG	DPW 2657	unknown		Brazil	Amazonas	Landrace	7.20 S	63.10 W	40	y
CIP 400322	400322	10.18730/2MYH	DPW 2660	unknown		Brazil	Amazonas	Landrace	7.20 S	63.10 W	40	y	y
CIP 400323	400323	10.18730/2MZJ	DPW 2661	unknown		Brazil	Amazonas	Landrace	7.20 S	63.10 W	40
CIP 400324	400324	10.18730/2N0K	DPW 2662	Vermelha		Brazil	Amazonas	Landrace	3.50 S	63.30 W	90
CIP 400325	400325	10.18730/2N1M	DPW 2664	unknown		Brazil	Amazonas	Landrace	3.48 S	60.28 W	50	y	y
CIP 400326	400326	10.18730/2N2N	DPW 2665	unknown		Brazil	Amazonas	Landrace	3.50 S	59.55 W	34	y
CIP 400327	400327	10.18730/2N3P	DPW 2666	unknown		Brazil	Amazonas	Landrace	3.02 S	60.04 W	34	y	y
CIP 400328	400328	10.18730/2N4Q	DPW 2667	unknown		Brazil	Amazonas	Landrace	2.55 S	59.50 W	34
CIP 400329	400329	10.18730/2N5R	DPW 2670	Branca		Brazil	Amazonas	Landrace	2.55 S	59.42 W	220
CIP 400331	400331	10.18730/2N6S	DPW 2672	unknown		Brazil	Amazonas	Landrace	2.55 S	59.41 W	34	y	y
CIP 400332	400332	10.18730/2N7T	DPW 2673	Reyna		Brazil	Amazonas	Landrace	2.55 S	59.40 W	220
CIP 400333	400333	10.18730/2N8V	DPW 2674	Roxa		Brazil	Amazonas	Landrace	2.55 S	59.38 W	34	y	y
CIP 400334	400334	10.18730/2N9W	DPW 2675	unknown		Brazil	Amazonas	Landrace	2.57 S	59.20 W	180
CIP 400335	400335	10.18730/2NAX	DPW 2676	unknown		Brazil	Amazonas	Landrace	2.57 S	59.20 W	180
CIP 400336	400336	10.18730/2NBY	DPW 2677	unknown		Brazil	Amazonas	Landrace	2.57 S	59.20 W	180	y
CIP 400337	400337	10.18730/2NCZ	DPW 2678	Batata Arana		Brazil	Amazonas	Landrace	3.10 S	60.20 W	24
CIP 400338	400338	10.18730/2ND*	DPW 2680	Balon		Brazil	Amazonas	Landrace	3.10 S	60.22 W	24
CIP 400339	400339	10.18730/2NE~	DPW 2681	unknown		Brazil	Amazonas	Landrace	3.10 S	60.22 W	24	y	y
CIP 400340	400340	10.18730/2NF$	DPW 2682	unknown		Brazil	Amazonas	Landrace	3.10 S	60.22 W	24	y	y
CIP 400342	400342	10.18730/2NG=	I00441	Brazil Native	19910927	Brazil		LandRace				y
CIP 400345	400345	10.18730/2NHU	PDRAL 2780	unknown	19900528	Brazil	Mato Grosso	LandRace	15.13 S	59.19 W	290
CIP 400346	400346	10.18730/2NJ0	PDRAL 2781	unknown	19900528	Brazil	Mato Grosso	LandRace	15.13 S	59.19 W	290	y	y
CIP 400347	400347	10.18730/2NK1	PDRAL 2812	unknown	19900528	Brazil	Rondonia	LandRace	13.30 S	61.13 W	190
CIP 400348	400348	10.18730/2NM2	PDRAL 2831	unknown	19900528	Brazil	Rondonia	LandRace	13.30 S	61.13 W	190
CIP 400349	400349	10.18730/2NN3	PDRAL 2834	unknown	19900528	Brazil	Rondonia	LandRace	13.30 S	61.13 W	127	y	y
CIP 400350	400350	10.18730/2NP4	PDRAL 2852	unknown	19900528	Brazil	Rondonia	LandRace	11.55 S	62.35 W	244
CIP 400351	400351	10.18730/2NQ5	PDRAL 2853	unknown	19900528	Brazil	Rondonia	LandRace	11.55 S	62.35 W	244
CIP 400353	400353	10.18730/2NR6	PDRAL 2864	unknown	19900528	Brazil	Rondonia	LandRace	8.45 S	64.10 W	111
CIP 400354	400354	10.18730/2NS7	PDRAL 2898	unknown	19900528	Brazil	Rondonia	LandRace	14.45 S	64.50 W	136
CIP 400355	400355	10.18730/2NT8	PDRAL 2911	unknown	19900528	Brazil	Amazonas	LandRace	3.05 S	60.00 W	36
CIP 400356	400356	10.18730/2NV9	DLP 960	Amarillo		Colombia	Cordoba	LandRace	8.45 N	75.45 W	15	y	y
CIP 400357	400357	10.18730/2NWA	DLP 962	Morado		Colombia	Cordoba	LandRace	9.20 N	75.50 W	100	y
CIP 400358	400358	10.18730/2NXB	DLP 971	Blanca		Colombia	Cordoba	LandRace	8.45 N	76.40 W	51	y	y
CIP 400359	400359	10.18730/2NYC	DLP 972	unknown		Colombia	Cordoba	LandRace	8.45 N	76.50 W	30
CIP 400360	400360	10.18730/2NZD	DLP 976	unknown		Colombia	Cordoba	LandRace	8.40 N	76.40 W	50	y	y
CIP 400361	400361	10.18730/2P0E	DLP 977	unknown		Colombia	Cordoba	LandRace	8.50 N	75.40 W	61	y
CIP 400362	400362	10.18730/2P1F	DLP 978	unknown		Colombia	Cordoba	LandRace	8.50 N	75.40 W	61	y	y
CIP 400363	400363	10.18730/2P2G	DLP 979	Yema de Huevo		Colombia	Cordoba	LandRace	8.50 N	75.45 W	55	y	y
CIP 400364	400364	10.18730/2P3H	DLP 981	De Leche		Colombia	Cordoba	LandRace	8.45 N	75.40 W	61
CIP 400365	400365	10.18730/2P4J	DLP 984	unknown		Colombia	Cordoba	LandRace	8.45 N	75.40 W	61	y
CIP 400366	400366	10.18730/2P5K	DLP 990	Blanco		Colombia	Cordoba	LandRace	8.45 N	76.40 W	20
CIP 400367	400367	10.18730/2P6M	DLP 992	unknown		Colombia	Cordoba	LandRace	9.20 N	75.50 W	152	y
CIP 400368	400368	10.18730/2P7N	DLP 1001	Morado		Colombia	Cordoba	LandRace	8.40 N	76.40 W	78	y	y
CIP 400369	400369	10.18730/2P8P	DLP 1011	Morado		Colombia	Cordoba	LandRace	8.45 N	75.40 W	78
CIP 400370	400370	10.18730/2P9Q	DLP 1014	Roja		Colombia	Cordoba	LandRace	9.20 N	75.20 W	107
CIP 400371	400371	10.18730/2PAR	DLP 1015	Blanca		Colombia	Cordoba	LandRace	9.20 N	75.20 W	107
CIP 400372	400372	10.18730/2PBS	DLP 1016	Morado		Colombia	Cordoba	LandRace	9.10 N	75.30 W	109	y	y
CIP 400373	400373	10.18730/2PCT	DLP 1017	Blanco		Colombia	Sucre	LandRace	8.10 N	75.40 W	198	y	y
CIP 400374	400374	10.18730/2PDV	DLP 1023	unknown		Colombia	Sucre	LandRace	9.20 N	75.15 W	256
CIP 400375	400375	10.18730/2PEW	DLP 1025	Mariquitena		Colombia	Sucre	LandRace	9.20 N	75.15 W	260
CIP 400376	400376	10.18730/2PFX	DLP 1037	Amarilla		Colombia	Bolivar	LandRace	9.30 N	74.50 W	210
CIP 400377	400377	10.18730/2PGY	DLP 1045	unknown		Colombia	Atlantico	LandRace	9.55 N	75.20 W	21	y	y
CIP 400378	400378	10.18730/2PHZ	DLP 1046	Ubre de Vaca		Colombia	Bolivar	LandRace	9.45 N	75.25 W	197
CIP 400379	400379	10.18730/2PJ*	DLP 1047	Morada Blanca		Colombia	Bolivar	LandRace	9.45 N	75.25 W	197	y	y
CIP 400380	400380	10.18730/2PK~	DLP 1051	Rosada Amarilla		Colombia	Magdalena	LandRace	10.55 N	74.30 W	10
CIP 400381	400381	10.18730/2PM$	DLP 1052	Rosada		Colombia	Magdalena	LandRace	10.55 N	75.30 W	10	y	y
CIP 400382	400382	10.18730/2PN=	DLP 1058	unknown		Colombia	Magdalena	LandRace	11.30 N	72.50 W	54	y	y
CIP 400383	400383	10.18730/2PPU	DLP 1061	De Dulce		Colombia	Cundinamarca	LandRace	4.30 N	74.20 W	2450	y	y
CIP 400384	400384	10.18730/2PQ0	DLP 1062	De Sal		Colombia	Cundinamarca	LandRace	4.30 N	74.20 W	2450
CIP 400385	400385	10.18730/2PR1	DLP 1684	Amarilla		Colombia	Huila	LandRace	2.46 N	75.28 W	1340	y	y
CIP 400387	400387	10.18730/2PS2	DLP 1691	unknown		Colombia	Huila	LandRace	2.34 N	75.40 W	923
CIP 400389	400389	10.18730/2PT3	DLP 1697	Huasca		Colombia	Huila	LandRace	1.52 N	76.05 W	2190
CIP 400390	400390	10.18730/2PV4	DLP 1698	Batata		Colombia	Huila	LandRace	1.50 N	76.15 W	1680
CIP 400391	400391	10.18730/2PW5	DLP 1699	unknown		Colombia	Huila	LandRace	1.49 N	76.16 W	1740
CIP 400392	400392	10.18730/2PX6	DLP 1700	unknown		Colombia	Huila	LandRace	1.49 N	76.16 W	1740
CIP 400393	400393	10.18730/2PY7	DLP 1701	Roja		Colombia	Huila	LandRace	1.49 N	76.16 W	1740	y
CIP 400394	400394	10.18730/2PZ8	DLP 1702	Blanca		Colombia	Huila	LandRace	1.49 N	76.16 W	1740	y	y
CIP 400395	400395	10.18730/2Q09	DLP 1705	Blanca		Colombia	Huila	LandRace	1.55 N	76.22 W	1700
CIP 400396	400396	10.18730/2Q1A	DLP 1706	unknown		Colombia	Huila	LandRace	1.55 N	76.22 W	1700	y	y
CIP 400397	400397	10.18730/2Q2B	DLP 1714	Amarilla		Colombia	Huila	LandRace	2.25 N	75.52 W	1799
CIP 400398	400398	10.18730/2Q3C	DLP 1715	Morada		Colombia	Huila	LandRace	2.26 N	75.54 W	2100	y	y
CIP 400399	400399	10.18730/2Q4D	DLP 1718	Batata		Colombia	Cauca	LandRace	2.32 N	76.38 W	1880
CIP 400400	400400	10.18730/2Q5E	DLP 1719	unknown		Colombia	Cauca	LandRace	2.32 N	76.38 W	1880	y	y
CIP 400402	400402	10.18730/2Q6F	DLP 1722	unknown		Colombia	Narino	LandRace	1.15 N	77.18 W	2017	y	y
CIP 400403	400403	10.18730/2Q7G	DLP 1723	Villana		Colombia	Narino	LandRace	1.30 N	77.20 W	1841	y
CIP 400404	400404	10.18730/2Q8H	DLP 1724	Blanca		Colombia	Narino	LandRace	1.30 N	77.20 W	1841	y	y
CIP 400405	400405	10.18730/2Q9J	DLP 1725	Sotero		Colombia	Narino	LandRace	1.30 N	77.20 W	1841
CIP 400406	400406	10.18730/2QAK	DLP 1726	unknown		Colombia	Narino	LandRace	1.32 N	77.20 W	1458
CIP 400407	400407	10.18730/2QBM	DLP 1727	unknown		Colombia	Narino	LandRace	1.32 N	77.20 W	1458
CIP 400408	400408	10.18730/2QCN	DLP 1728	Morada Larga		Colombia	Narino	LandRace	1.32 N	77.16 W	1438	y	y
CIP 400409	400409	10.18730/2QDP	DLP 1729	Codisalida		Colombia	Narino	LandRace	1.32 N	77.16 W	1438	y	y
CIP 400411	400411	10.18730/2QEQ	DLP 1731	Blanca		Colombia	Narino	LandRace	1.32 N	77.15 W	1738
CIP 400412	400412	10.18730/2QFR	DLP 1732	Codisalida		Colombia	Narino	LandRace	1.32 N	77.15 W	1738	y
CIP 400413	400413	10.18730/2QGS	DLP 1733	Logrera		Colombia	Narino	LandRace	1.34 N	77.14 W	2033
CIP 400414	400414	10.18730/2QHT	DLP 1734	Leonarda		Colombia	Narino	LandRace	1.34 N	77.17 W	1841
CIP 400415	400415	10.18730/2QJV	DLP 1735	Tijereta		Colombia	Narino	LandRace	1.34 N	77.17 W	1841	y	y
CIP 400416	400416	10.18730/2QKW	DLP 1736	Exquisita		Colombia	Narino	LandRace	1.34 N	77.17 W	1841	y	y
CIP 400417	400417	10.18730/2QMX	DLP 1737	Blanca		Colombia	Narino	LandRace	1.34 N	77.17 W	1841	y	y
CIP 400418	400418	10.18730/2QNY	DLP 1738	unknown		Colombia	Narino	LandRace	1.30 N	77.20 W	2113	y	y
CIP 400419	400419	10.18730/2QPZ	DLP 1739	unknown		Colombia	Narino	LandRace	1.30 N	77.20 W	2113	y	y
CIP 400420	400420	10.18730/2QQ*	DLP 1740	unknown		Colombia	Narino	LandRace	1.30 N	77.20 W	2113
CIP 400421	400421	10.18730/2QR~	DLP 1741	Corre Huasca		Colombia	Narino	LandRace	1.18 N	77.10 W	1787	y	y
CIP 400422	400422	10.18730/2QS$	DLP 1743	Sevillana		Colombia	Narino	LandRace	1.18 N	77.10 W	1787	y	y
CIP 400423	400423	10.18730/2QT=	DLP 1744	Blanca		Colombia	Narino	LandRace	1.18 N	77.10 W	1787	y	y
CIP 400424	400424	10.18730/2QVU	DLP 1746	unknown		Colombia	Narino	LandRace	1.18 N	77.08 W	1637
CIP 400425	400425	10.18730/2QW0	DLP 1750	unknown		Colombia	Narino	LandRace	1.18 N	77.06 W	1637	y	y
CIP 400426	400426	10.18730/2QX1	DLP 1751	unknown		Colombia	Narino	LandRace	1.18 N	77.06 W	1637	y	y
CIP 400428	400428	10.18730/2QY2	DLP 1753	Amarilla		Colombia	Narino	LandRace	1.40 N	77.00 W	1650
CIP 400429	400429	10.18730/2QZ3	DLP 1754	Batatilla		Colombia	Narino	LandRace	1.40 N	77.00 W	1650	y	y
CIP 400430	400430	10.18730/2R04	DLP 1755	Huilenza		Colombia	Narino	LandRace	1.40 N	76.58 W	2091
CIP 400431	400431	10.18730/2R15	DLP 1756	Calentana		Colombia	Narino	LandRace	1.40 N	76.58 W	2091	y
CIP 400432	400432	10.18730/2R26	DLP 1757	Batatilla		Colombia	Narino	LandRace	1.38 N	76.56 W	1978	y	y
CIP 400433	400433	10.18730/2R37	DLP 1758	Batatilla		Colombia	Narino	LandRace	1.38 N	76.57 W	1978	y	y
CIP 400434	400434	10.18730/2R48	DLP 1759	Morena		Colombia	Narino	LandRace	1.38 N	76.57 W	1978	y	y
CIP 400435	400435	10.18730/2R59	DLP 1760	Negra o Morena		Colombia	Narino	LandRace	1.36 N	76.56 W	1740
CIP 400436	400436	10.18730/2R6A	DLP 1762	Froilana		Colombia	Narino	LandRace	1.36 N	76.55 W	1740	y
CIP 400437	400437	10.18730/2R7B	DLP 1764	Blanca		Colombia	Narino	LandRace	1.34 N	76.56 W	1750	y	y
CIP 400438	400438	10.18730/2R8C	DLP 1766	Morada		Colombia	Narino	LandRace	1.32 N	77.10 W	1754
CIP 400439	400439	10.18730/2R9D	DLP 1767	unknown		Colombia	Narino	LandRace	1.30 N	77.10 W	2267
CIP 400440	400440	10.18730/2RAE	DLP 1768	Roja		Colombia	Narino	LandRace	1.30 N	77.10 W	2267
CIP 400441	400441	10.18730/2RBF	DLP 1769	unknown		Colombia	Narino	LandRace	1.30 N	77.10 W	2267	y	y
CIP 400442	400442	10.18730/2RCG	DLP 1770	unknown		Colombia	Narino	LandRace	1.30 N	77.10 W	2267	y	y
CIP 400443	400443	10.18730/2RDH	DLP 1771	Camota		Colombia	Narino	LandRace	1.28 N	77.35 W	2060
CIP 400444	400444	10.18730/2REJ	DLP 1772	unknown		Colombia	Narino	LandRace	1.28 N	77.35 W	2060
CIP 400445	400445	10.18730/2RFK	DLP 1773	unknown		Colombia	Narino	LandRace	1.28 N	77.35 W	2060
CIP 400446	400446	10.18730/2RGM	DLP 1774	Camota		Colombia	Narino	LandRace	1.28 N	77.35 W	206	y	y
CIP 400447	400447	10.18730/2RHN	DLP 1776	unknown		Colombia	Narino	LandRace	1.30 N	77.34 W	1980	y	y
CIP 400448	400448	10.18730/2RJP	DLP 1777	Morado		Colombia	Narino	LandRace	1.31 N	77.34 W	1731
CIP 400449	400449	10.18730/2RKQ	DLP 1780	unknown		Colombia	Narino	LandRace	1.14 N	77.26 W	1576	y	y
CIP 400450	400450	10.18730/2RMR	DLP 1781	Bogotana		Colombia	Narino	LandRace	1.10 N	77.35 W	1618	y	y
CIP 400451	400451	10.18730/2RNS	DLP 1782	Batata		Colombia	Narino	LandRace	1.12 N	77.36 W	1680	y
CIP 400452	400452	10.18730/2RPT	DLP 1784	unknown		Colombia	Narino	LandRace	1.14 N	77.24 W	1792
CIP 400453	400453	10.18730/2RQV	DLP 1785	unknown		Colombia	Narino	LandRace	1.14 N	77.24 W	1792
CIP 400454	400454	10.18730/2RRW	DLP 1786	Batata Dulce		Colombia	Narino	LandRace	1.14 N	77.24 W	1792	y	y
CIP 400455	400455	10.18730/2RSX	DLP 1787	Morada		Colombia	Narino	LandRace	1.10 N	77.34 W	1810
CIP 400456	400456	10.18730/2RTY	DLP 1788	unknown		Colombia	Narino	LandRace	1.12 N	77.35 W	1760
CIP 400457	400457	10.18730/2RVZ	DLP 1789	Morado Dulce		Colombia	Narino	LandRace	1.10 N	77.32 W	1740
CIP 400458	400458	10.18730/2RW*	DLP 1790	Blanca de Sal		Colombia	Narino	LandRace	1.10 N	77.32 W	1740	y	y
CIP 400459	400459	10.18730/2RX~	DLP 1791	Morada Pequena		Colombia	Narino	LandRace	1.15 N	77.15 W	2926	y	y
CIP 400460	400460	10.18730/2RY$	DLP 1792	Blanca		Colombia	Narino	LandRace	1.16 N	77.15 W	2536
CIP 400461	400461	10.18730/2RZ=	DLP 1793	Morada		Colombia	Narino	LandRace	1.16 N	77.15 W	2536
CIP 400462	400462	10.18730/2S0U	DLP 1800	Batatilla		Colombia	Cauca	LandRace	2.15 N	76.40 W	1947	y	y
CIP 400464	400464	10.18730/2S10	DLP 1823	unknown		Colombia	Valle De Cauca	LandRace	3.25 N	76.35 W	1180
CIP 400466	400466	10.18730/2S21	DLP 1852	Blanca		Colombia	Quindio	LandRace	4.23 N	75.26 W	1284	y	y
CIP 400467	400467	10.18730/2S32	DLP 1853	Rojo		Colombia	Quindio	LandRace	4.22 N	75.26 W	1284	y	y
CIP 400468	400468	10.18730/2S43	DLP 1856	unknown		Colombia	Quindio	LandRace	4.26 N	75.20 W	1250
CIP 400469	400469	10.18730/2S54	DLP 1858	unknown		Colombia	Quindio	LandRace	4.25 N	75.25 W	1165
CIP 400470	400470	10.18730/2S65	DLP 1861	unknown		Colombia	Quindio	LandRace	4.26 N	75.25 W	1112	y	y
CIP 400471	400471	10.18730/2S76	DLP 1862	Morado		Colombia	Quindio	LandRace	4.24 N	75.26 W	1240	y
CIP 400472	400472	10.18730/2S87	DLP 1865	unknown		Colombia	Quindio	LandRace	4.26 N	75.24 W	1280	y	y
CIP 400473	400473	10.18730/2S98	DLP 1866	unknown		Colombia	Valle De Cauca	LandRace	4.20 N	75.50 W	2791	y	y
CIP 400474	400474	10.18730/2SA9	DLP 1867	unknown		Colombia	Valle De Cauca	LandRace	4.18 N	75.50 W	2605	y
CIP 400475	400475	10.18730/2SBA	DLP 1868	unknown		Colombia	Valle De Cauca	LandRace	4.16 N	75.52 W	1169	y	y
CIP 400476	400476	10.18730/2SCB	DLP 1869	Batata Roja		Colombia	Valle De Cauca	LandRace	4.14 N	75.55 W	1440	y	y
CIP 400477	400477	10.18730/2SDC	DLP 1870	unknown		Colombia	Valle De Cauca	LandRace	4.14 N	75.56 W	1440	y	y
CIP 400478	400478	10.18730/2SED	DLP 1871	unknown		Colombia	Valle De Cauca	LandRace	4.20 N	75.55 W	1282	y	y
CIP 400479	400479	10.18730/2SFE	DLP 1872	unknown		Colombia	Quindio	LandRace	4.30 N	75.45 W	1430	y	y
CIP 400480	400480	10.18730/2SGF	DLP 1873	unknown		Colombia	Quindio	LandRace	4.28 N	75.46 W	1420	y	y
CIP 400481	400481	10.18730/2SHG	DLP 1879	unknown		Colombia	Tolima	LandRace	4.25 N	75.20 W	1738	y	y
CIP 400483	400483	10.18730/2SJH	DLP 1887	Batata		Colombia	Tolima	LandRace	4.28 N	75.18 W	2233
CIP 400484	400484	10.18730/2SKJ	DLP 1894	unknown		Colombia	Cundinamarca	LandRace	5.02 N	74.50 W	702	y	y
CIP 400487	400487	10.18730/2SMK	DLP 1898	unknown		Colombia	Cundinamarca	LandRace	4.54 N	74.24 W	1121
CIP 400491	400491	10.18730/2SNM	DLP 2054	Batata		Colombia	Atlantico	LandRace	10.16 N	75.37 W	130	y
CIP 400492	400492	10.18730/2SPN	DLP 2058	Batata		Colombia	Magdalena	LandRace	11.23 N	74.11 W	180
CIP 400493	400493	10.18730/2SQP	DLP 2061	Batatas		Colombia	Magdalena	LandRace	11.15 N	73.37 W	106
CIP 400494	400494	10.18730/2SRQ	DLP 2064	unknown		Colombia	La Guajira	LandRace	11.15 N	73.36 W	1046	y	y
CIP 400495	400495	10.18730/2SSR	DLP 2065	unknown		Colombia	La Guajira	LandRace	11.15 N	73.36 W	1046
CIP 400496	400496	10.18730/2STS	DLP 2067	unknown		Colombia	La Guajira	LandRace	11.16 N	73.24 W	40
CIP 400497	400497	10.18730/2SVT	DLP 2074	Batata		Colombia	La Guajira	LandRace	10.50 N	72.50 W	177	y	y
CIP 400498	400498	10.18730/2SWV	DLP 2076	unknown		Colombia	La Guajira	LandRace	10.48 N	72.51 W	177
CIP 400499	400499	10.18730/2SXW	DLP 2079	Amarilla		Colombia	La Guajira	LandRace	10.48 N	72.54 W	190	y	y
CIP 400500	400500	10.18730/2SYX	DLP 2080	Morado		Colombia	La Guajira	LandRace	10.46 N	72.55 W	199	y	y
CIP 400501	400501	10.18730/2SZY	DLP 2081	Blanco		Colombia	La Guajira	LandRace	10.46 N	72.55 W	199	y	y
CIP 400502	400502	10.18730/2T0Z	DLP 2082	Amarilla		Colombia	La Guajira	LandRace	10.46 N	72.55 W	199	y	y
CIP 400503	400503	10.18730/2T1*	DLP 2091	unknown		Colombia	Cesar	LandRace	10.17 N	72.12 W	130
CIP 400504	400504	10.18730/2T2~	DLP 2092	Amarilla		Colombia	Cesar	LandRace	10.16 N	72.13 W	126	y	y
CIP 400505	400505	10.18730/2T3$	DLP 2093	Morada		Colombia	Cesar	LandRace	10.16 N	72.13 W	126	y	y
CIP 400506	400506	10.18730/2T4=	DLP 2095	Morada		Colombia	Cesar	LandRace	10.16 N	72.13 W	126	y	y
CIP 400507	400507	10.18730/2T5U	DLP 2102	Morada		Colombia	Cesar	LandRace	10.21 N	73.16 W	190	y	y
CIP 400508	400508	10.18730/2T60	DLP 2104	unknown		Colombia	Cesar	LandRace	10.20 N	73.18 W	810	y	y
CIP 400509	400509	10.18730/2T71	DLP 2108	Blanca		Colombia	Cesar	LandRace	10.25 N	73.45 W	1087	y	y
CIP 400510	400510	10.18730/2T82	DLP 2113	Amarilla		Colombia	Cesar	LandRace	10.15 N	73.35 W	99
CIP 400511	400511	10.18730/2T93	DLP 2114	Blanca		Colombia	Cesar	LandRace	10.15 N	73.35 W	99
CIP 400512	400512	10.18730/2TA4	DLP 2145	unknown		Colombia	Cesar	LandRace	8.21 N	73.31 W	40	y	y
CIP 400514	400514	10.18730/2TB5	DLP 2151	La Venezolana		Colombia	Norte Santander	LandRace	8.05 N	73.03 W	1375
CIP 400515	400515	10.18730/2TC6	DLP 2152	Tuna		Colombia	Norte Santander	LandRace	8.05 N	73.03 W	1375	y	y
CIP 400516	400516	10.18730/2TD7	DLP 2153	Morada		Colombia	Norte Santander	LandRace	8.05 N	73.03 W	1375
CIP 400517	400517	10.18730/2TE8	DLP 2154	De La Fina		Colombia	Norte Santander	LandRace	8.04 N	73.00 W	1150	y	y
CIP 400518	400518	10.18730/2TF9	DLP 2156	Batata Amarilla		Colombia	Cesar	LandRace	8.20 N	73.26 W	879
CIP 400519	400519	10.18730/2TGA	DLP 2158	unknown		Colombia	Norte Santander	LandRace	7.25 N	72.30 W	1047	y	y
CIP 400520	400520	10.18730/2THB	DLP 2159	unknown		Colombia	Norte Santander	LandRace	7.28 N	72.40 W	1047	y	y
CIP 400521	400521	10.18730/2TJC	DLP 2164	Amarilla Ubre De Vaca		Colombia	Norte Santander	LandRace	7.20 N	72.35 W	1644	y
CIP 400522	400522	10.18730/2TKD	DLP 2165	Amarilla de Sal		Colombia	Norte Santander	LandRace	7.21 N	72.36 W	2000	y
CIP 400523	400523	10.18730/2TME	DLP 2166	Amarilla de Dulce		Colombia	Norte Santander	LandRace	7.19 N	72.34 W	1633
CIP 400524	400524	10.18730/2TNF	DLP 2167	unknown		Colombia	Norte Santander	LandRace	7.18 N	72.36 W	1075
CIP 400525	400525	10.18730/2TPG	DLP 2168	unknown		Colombia	Norte Santander	LandRace	7.30 N	72.35 W	1270	y	y
CIP 400526	400526	10.18730/2TQH	LOP 87-1791	Batata Blanca	19880505	Colombia	Bolivar	LandRace			19
CIP 400527	400527	10.18730/2TRJ	LOP 87-1799	Batata	19880505	Colombia	Bolivar	LandRace			13
CIP 400528	400528	10.18730/2TSK	LOP 87-1809	Batata	19880505	Colombia	Antioquia	LandRace			100	y	y
CIP 400529	400529	10.18730/2TTM	CATIE 6075	Unknown	19860618	Costa Rica		LandRace
CIP 400530	400530	10.18730/2TVN	CATIE 6312	Unknown	19860618	Costa Rica		LandRace
CIP 400531	400531	10.18730/2TWP	CATIE 6579	Unknown	19860618	Costa Rica		LandRace
CIP 400532	400532	10.18730/2TXQ	CATIE 7044	Unknown	19860618	Costa Rica		LandRace				y	y
CIP 400533	400533	10.18730/2TYR	CATIE 7045	Unknown	19860618	Costa Rica		LandRace
CIP 400534	400534	10.18730/2TZS	CATIE 7137	Unknown	19860618	Costa Rica		LandRace
CIP 400535	400535	10.18730/2V0T	CATIE 7138	Unknown	19860618	Costa Rica		LandRace
CIP 400536	400536	10.18730/2V1V	CATIE 7721	Unknown	19860618	Costa Rica		LandRace
CIP 400537	400537	10.18730/2V2W	CATIE 8086	Unknown	19860618	Costa Rica		LandRace				y	y
CIP 400538	400538	10.18730/2V3X	CATIE 8447	Unknown	19860618	Costa Rica		LandRace				y
CIP 400539	400539	10.18730/2V4Y	CATIE 8448	Unknown	19860618	Costa Rica		LandRace
CIP 400540	400540	10.18730/2V5Z	CATIE 8449	Unknown	19860618	Costa Rica		LandRace				y	y
CIP 400541	400541	10.18730/2V6*	CATIE 8452	Puerto Rico-2	19860618	Costa Rica		LandRace				y	y
CIP 400542	400542	10.18730/2V7~	CATIE 8454	Puerto Rico-2	19860618	Costa Rica		LandRace				y	y
CIP 400543	400543	10.18730/2V8$	CATIE 8455	Variedad Local	19860618	Costa Rica		LandRace
CIP 400544	400544	10.18730/2V9=	CATIE 8456	Unknown	19860618	Costa Rica		LandRace
CIP 400545	400545	10.18730/2VAU	CATIE 8458	Selec. Puerto Rico-2	19860618	Costa Rica		BredLine				y
CIP 400547	400547	10.18730/2VB0	CATIE 8466	Unknown	19860618	Costa Rica		LandRace
CIP 400548	400548	10.18730/2VC1	CATIE 8467	Unknown	19860618	Costa Rica		LandRace
CIP 400549	400549	10.18730/2VD2	CATIE 8469	Unknown	19860618	Costa Rica		LandRace
CIP 400550	400550	10.18730/2VE3	CATIE 8474	Unknown	19860618	Costa Rica		LandRace				y	y
CIP 400551	400551	10.18730/2VF4	CATIE 8510	Unknown	19860618	Costa Rica		LandRace				y	y
CIP 400552	400552	10.18730/2VG5	CATIE 8511	Unknown	19860618	Costa Rica		LandRace				y
CIP 400553	400553	10.18730/2VH6	CATIE 8514	Unknown	19860618	Costa Rica		LandRace				y
CIP 400555	400555	10.18730/2VJ7	CATIE 8516	Unknown	19860618	Costa Rica		LandRace
CIP 400556	400556	10.18730/2VK8	CATIE 8517	Unknown	19860618	Costa Rica		LandRace				y	y
CIP 400557	400557	10.18730/2VM9	CATIE 8518	Unknown	19860618	Costa Rica		LandRace
CIP 400558	400558	10.18730/2VNA	CATIE 8520	Unknown	19860618	Costa Rica		LandRace
CIP 400559	400559	10.18730/2VPB	CATIE 8521	Unknown	19860618	Costa Rica		LandRace
CIP 400560	400560	10.18730/2VQC	CATIE 8522	Unknown	19860618	Costa Rica		LandRace
CIP 400561	400561	10.18730/2VRD	CATIE 8523	Unknown	19860618	Costa Rica		LandRace				y
CIP 400562	400562	10.18730/2VSE	CATIE 8524	Unknown	19860618	Costa Rica		LandRace
CIP 400563	400563	10.18730/2VTF	CATIE 8545	Unknown	19860618	Costa Rica		LandRace				y
CIP 400564	400564	10.18730/2VVG	CATIE 8587	Unknown	19860618	Costa Rica		LandRace
CIP 400565	400565	10.18730/2VWH	CATIE 8988	Unknown	19860618	Costa Rica		LandRace
CIP 400566	400566	10.18730/2VXJ	CATIE11753	Unknown	19860618	Costa Rica		LandRace
CIP 400567	400567	10.18730/2VYK	I01410	Unknown	19910927	Costa Rica		LandRace
CIP 400568	400568	10.18730/2VZM	I01411	Unknown	19910927	Costa Rica		LandRace
CIP 400569	400569	10.18730/2W0N	CTX 1	Blanco Especial	19871025	Cuba		LandRace				y	y
CIP 400570	400570	10.18730/2W1P	CTX 2	Baracutey	19871025	Cuba		LandRace
CIP 400571	400571	10.18730/2W2Q	CTX 3	Cuba 1	19871025	Cuba		LandRace
CIP 400572	400572	10.18730/2W3R	CTX 4	Cuba 2	19871025	Cuba		LandRace				y	y
CIP 400573	400573	10.18730/2W4S	CTX 5	Cuba 3	19871025	Cuba		LandRace				y	y
CIP 400574	400574	10.18730/2W5T	CTX 6	Cuba 6	19871025	Cuba		LandRace				y	y
CIP 400575	400575	10.18730/2W6V	CTX 34	Cuba 9	19871025	Cuba		LandRace				y	y
CIP 400576	400576	10.18730/2W7W	CTX 35	Haiti	19871025	Cuba		LandRace				y	y
CIP 400577	400577	10.18730/P7F0E	INIVIT 2	Alquicita Camagueyana	19940201	Cuba		Landrace
CIP 400578	400578	10.18730/P66MH	INIVIT 3	Aparecido Manchado	19940201	Cuba		Landrace
CIP 400579	400579	10.18730/P7F1F	INIVIT 4	Argollita Colorada	19940201	Cuba		Landrace
CIP 400580	400580	10.18730/P7F2G	INIVIT 5	Argollita Blanca	19940201	Cuba		Landrace
CIP 400581	400581		INIVIT 6	Baracoa 1	19940201	Cuba		Landrace				y	y
CIP 400582	400582	10.18730/P7F3H	INIVIT 8	Blanco Ciego de Avila	19940201	Cuba		Landrace				y	y
CIP 400583	400583	10.18730/P7F4J	INIVIT 14	Boca De Saco	19940201	Cuba		Landrace
CIP 400584	400584	10.18730/P66NJ	INIVIT 15	Bonito	19940201	Cuba		Landrace				y
CIP 400585	400585	10.18730/P7F5K	INIVIT 16	Bolo Carracedo	19940201	Cuba		Landrace
CIP 400586	400586	10.18730/P7F6M	INIVIT 17	Bolo Colorado	19940201	Cuba		Landrace
CIP 400587	400587	10.18730/P7F7N	INIVIT 18	Buen Amigo	19940201	Cuba		Landrace
CIP 400588	400588	10.18730/P7F8P	INIVIT 19	Camagueyano	19940201	Cuba		Landrace				y	y
CIP 400589	400589	10.18730/P66PK	INIVIT 20	Camarioca	19940201	Cuba		Landrace
CIP 400590	400590	10.18730/P7F9Q	INIVIT 21	Campanilla	19940201	Cuba		Landrace				y	y
CIP 400591	400591	10.18730/P7FAR	INIVIT 22	Canario	19940201	Cuba		Landrace				y	y
CIP 400592	400592	10.18730/P7FBS	INIVIT 23	Canzola	19940201	Cuba		Landrace
CIP 400593	400593	10.18730/P7FCT	INIVIT 24	Carenero	19940201	Cuba		Landrace
CIP 400594	400594	10.18730/P7FDV	INIVIT 26	Carolina 3	19940201	Cuba		Landrace
CIP 400595	400595	10.18730/P7FEW	INIVIT 27	Catalina	19940201	Cuba		Landrace				y	y
CIP 400596	400596	10.18730/P7FFX	INIVIT 28	Almendron Morado	19940201	Cuba		Landrace				y	y
CIP 400597	400597	10.18730/P7FGY	INIVIT 29	Nicaragua	19940201	Cuba		Landrace
CIP 400598	400598	10.18730/P7FHZ	INIVIT 31	Chupa Y Traga	19940201	Cuba		Landrace				y	y
CIP 400599	400599	10.18730/P7FJ*	INIVIT 33	Cuero de Lola	19940201	Cuba		Landrace				y	y
CIP 400600	400600	10.18730/P7FK~	INIVIT 34	Dorado	19940201	Cuba		Landrace
CIP 400601	400601	10.18730/P7FM$	INIVIT 35	Engorda Habana	19940201	Cuba		Landrace
CIP 400602	400602	10.18730/P66QM	INIVIT 36	Engorda Villareno	19940201	Cuba		Landrace
CIP 400603	400603	10.18730/P7FN=	INIVIT 37	Engorda Villareno Amarill	19940201	Cuba		Landrace				y	y
CIP 400604	400604	10.18730/P7FPU	INIVIT 39	Felito	19940201	Cuba		Landrace
CIP 400605	400605	10.18730/P7FQ0	INIVIT 40	Fumero	19940201	Cuba		Landrace
CIP 400606	400606	10.18730/P7FR1	INIVIT 43	Guaimaro 2	19940201	Cuba		Landrace
CIP 400607	400607	10.18730/P7FS2	INIVIT 45	Guantanamero	19940201	Cuba		Landrace				y	y
CIP 400608	400608	10.18730/P66RN	INIVIT 48	Haiti	19940201	Cuba		Landrace				y
CIP 400609	400609	10.18730/P7FT3	INIVIT 51	Jiquima	19940201	Cuba		Landrace
CIP 400610	400610	10.18730/P7FV4	INIVIT 53	La Paz Verde	19940201	Cuba		Landrace				y	y
CIP 400611	400611	10.18730/P7FW5	INIVIT 54	Amandado	19940201	Cuba		Landrace				y	y
CIP 400612	400612	10.18730/P7FX6	INIVIT 57	Leo 2	19940201	Cuba		Landrace				y	y
CIP 400615	400615	10.18730/P66SP	INIVIT 59	Martinica de Matojo	19940201	Cuba		Landrace
CIP 400616	400616	10.18730/P7FY7	INIVIT 60	Miguel Estrada	19940201	Cuba		Landrace				y	y
CIP 400617	400617	10.18730/P7FZ8	INIVIT 62	Morado 39	19940201	Cuba		Landrace				y	y
CIP 400618	400618	10.18730/P7G09	INIVIT 63	Nigua	19940201	Cuba		Landrace				y	y
CIP 400619	400619	10.18730/P7G1A	INIVIT 64	Negro Congo	19940201	Cuba		Landrace				y	y
CIP 400620	400620	10.18730/P7G2B	INIVIT 65	Morado X	19940201	Cuba		Landrace				y	y
CIP 400621	400621	10.18730/P66TQ	INIVIT 66	Palenque	19940201	Cuba		Landrace
CIP 400622	400622	10.18730/P66VR	INIVIT 67	Pan Con Vino	19940201	Cuba		Landrace
CIP 400623	400623		INIVIT 68	Matojito	19940201	Cuba		Landrace				y
CIP 400625	400625	10.18730/P7G3C	INIVIT 71	Pablo	19940201	Cuba		Landrace				y	y
CIP 400626	400626	10.18730/P7G4D	INIVIT 72	Papa Blanca	19940201	Cuba		Landrace				y	y
CIP 400627	400627	10.18730/P7G5E	INIVIT 74	Pata De Gallina	19940201	Cuba		Landrace				y	y
CIP 400628	400628	10.18730/P66WS	INIVIT 75	Peralejo Rojo	19940201	Cuba		Landrace				y	y
CIP 400629	400629	10.18730/P7G6F	INIVIT 77	Punti Blanco	19940201	Cuba		Landrace
CIP 400630	400630	10.18730/P7G7G	INIVIT 78	Santa Clara	19940201	Cuba		Landrace
CIP 400631	400631	10.18730/P7G8H	INIVIT 79	Roca Negra	19940201	Cuba		Landrace				y	y
CIP 400632	400632	10.18730/P66XT	INIVIT 83	Santiaguero	19940201	Cuba		Landrace
CIP 400633	400633	10.18730/P7G9J	INIVIT 84	Santa Lucia	19940201	Cuba		Landrace				y	y
CIP 400634	400634	10.18730/P7GAK	INIVIT 85	Santo Domingo 1	19940201	Cuba		Landrace				y	y
CIP 400635	400635	10.18730/P7GBM	INIVIT 86	Santa Isabel	19940201	Cuba		Landrace				y	y
CIP 400636	400636	10.18730/P7GCN	INIVIT 87	Seleccion Roja	19940201	Cuba		Landrace				y
CIP 400637	400637	10.18730/P7GDP	INIVIT 89	Solitario	19940201	Cuba		Landrace				y	y
CIP 400638	400638	10.18730/P7GEQ	INIVIT 91	Torres Blanco	19940201	Cuba		Landrace				y	y
CIP 400639	400639	10.18730/P7GFR	INIVIT 92	Tunas	19940201	Cuba		Landrace				y	y
CIP 400640	400640		INIVIT 93	Valiente	19940201	Cuba		Landrace
CIP 400641	400641	10.18730/P7GGS	INIVIT 94	Voluntario	19940201	Cuba		Landrace				y
CIP 400642	400642	10.18730/P7GHT	INIVIT 95	Venezuela	19940201	Cuba		Landrace				y
CIP 400643	400643	10.18730/P7GJV	INIVIT 96	Vino 1	19940201	Cuba		Landrace
CIP 400644	400644	10.18730/P7GKW	INIVIT 98	Vueltas	19940201	Cuba		Landrace				y
CIP 400645	400645		INIVIT 100	Mario	19940201	Cuba		Landrace
CIP 400646	400646	10.18730/P7GMX	INIVIT 103	Tucuman	19940201	Cuba		Landrace				y
CIP 400776	400776	10.18730/2W8X	CENDA 1	317-nc	19860812	Dominican Republic		BredLine				y
CIP 400777	400777	10.18730/2W9Y	CENDA 2	548-3	19860812	Dominican Republic		BredLine				y
CIP 400778	400778	10.18730/2WAZ	CENDA 3	W - 119	19860812	Dominican Republic		Bredline
CIP 400779	400779	10.18730/2WB*	CENDA 4	Milita	19860812	Dominican Republic		LandRace
CIP 400780	400780	10.18730/2WC~	CENDA 7	La Moradita	19860812	Dominican Republic		LandRace
CIP 400781	400781	10.18730/2WD$	CENDA 10	Prieto 1	19860812	Dominican Republic		LandRace
CIP 400782	400782	10.18730/2WE=	CENDA 11	Pichilin 4	19860812	Dominican Republic		LandRace				y	y
CIP 400783	400783	10.18730/2WFU	CENDA 12	Jasper (Puerto Rico)	19860812	Dominican Republic		ImpVariety
CIP 400784	400784	10.18730/2WG0	CENDA 15	La Loquita	19860812	Dominican Republic		LandRace
CIP 400785	400785	10.18730/2WH1	CENDA 16	C-3 (Costa Rica)	19860812	Dominican Republic		BredLine				y
CIP 400786	400786	10.18730/2WJ2	CENDA 17	Copela	19860812	Dominican Republic		LandRace					y
CIP 400787	400787	10.18730/2WK3	CENDA 18	Nina 12	19860812	Dominican Republic		LandRace
CIP 400788	400788	10.18730/2WM4	CENDA 19	Miguela 8	19860812	Dominican Republic		LandRace				y	y
CIP 400789	400789	10.18730/2WN5	CENDA 20	Jacobina 5	19860812	Dominican Republic		LandRace
CIP 400790	400790	10.18730/2WP6	CENDA 22	Ela 23	19860812	Dominican Republic		LandRace				y	y
CIP 400791	400791	10.18730/2WQ7	CENDA 24	Ela 15	19860812	Dominican Republic		LandRace				y	y
CIP 400792	400792	10.18730/2WR8	CESDA 1	Corredora	19860812	Dominican Republic		LandRace
CIP 400793	400793	10.18730/2WS9	CESDA 5	Mata Hambre	19860812	Dominican Republic		LandRace
CIP 400794	400794	10.18730/2WTA	CESDA 7	Ile	19860812	Dominican Republic		LandRace				y	y
CIP 400795	400795	10.18730/2WVB	CESDA 8	Bellaniris-i	19860812	Dominican Republic		LandRace
CIP 400796	400796	10.18730/2WWC	CESDA 9	Sola No Estan	19860812	Dominican Republic		LandRace
CIP 400797	400797	10.18730/2WXD	CESDA 11	Canolia Parada	19860812	Dominican Republic		LandRace
CIP 400798	400798	10.18730/2WYE	CESDA 12	Creta de Burra	19860812	Dominican Republic		LandRace
CIP 400800	400800	10.18730/2WZF	CESDA 17	Unknown	19860812	Dominican Republic		LandRace				y
CIP 400801	400801	10.18730/2X0G	CESDA 21	Unknown	19860812	Dominican Republic		LandRace				y	y
CIP 400802	400802	10.18730/2X1H	CESDA 22	Unknown	19860812	Dominican Republic		LandRace				y
CIP 400803	400803	10.18730/2X2J	CESDA 28	Unknown	19860812	Dominican Republic		LandRace
CIP 400804	400804	10.18730/2X3K	CESDA 33	Unknown	19860812	Dominican Republic		LandRace				y	y
CIP 400805	400805	10.18730/2X4M	CESDA 36	Unknown	19860812	Dominican Republic		LandRace
CIP 400806	400806	10.18730/2X5N	CESDA 38	Unknown	19860812	Dominican Republic		LandRace
CIP 400807	400807	10.18730/2X6P	CESDA 39	Unknown	19860812	Dominican Republic		LandRace				y
CIP 400808	400808	10.18730/2X7Q	CESDA 47	Unknown	19860812	Dominican Republic		LandRace
CIP 400809	400809	10.18730/2X8R	CESDA 51	Unknown	19860812	Dominican Republic		LandRace
CIP 400810	400810	10.18730/2X9S	CESDA 52	Unknown	19860812	Dominican Republic		LandRace
CIP 400811	400811	10.18730/2XAT	CESDA 56	Unknown	19860812	Dominican Republic		LandRace
CIP 400812	400812	10.18730/2XBV	CESDA 57	Unknown	19860812	Dominican Republic		LandRace				y	y
CIP 400813	400813	10.18730/2XCW	CESDA 62	Unknown	19860812	Dominican Republic		LandRace
CIP 400814	400814	10.18730/2XDX	DLP 1557	Blanquita		Dominican Republic	ravia	LandRace	18.40 N	70.45 W	952	y	y
CIP 400815	400815	10.18730/2XEY	DLP 1560	Brujita		Dominican Republic	ravia	LandRace	18.40 N	70.45 W	952	y	y
CIP 400817	400817	10.18730/2XFZ	DLP 1562	Varga		Dominican Republic	ravia	LandRace	18.40 N	70.45 W	952	y	y
CIP 400819	400819	10.18730/2XG*	DLP 1567	Tunita		Dominican Republic	ravia	LandRace	18.55 N	70.42 W	1198	y	y
CIP 400820	400820	10.18730/2XH~	DLP 1570	Moena		Dominican Republic	cey Al Medio	LandRace	19.40 N	70.50 W	205
CIP 400821	400821	10.18730/2XJ$	DLP 1571	Telacebolla		Dominican Republic	cey Al Medio	LandRace	19.40 N	70.50 W	205	y	y
CIP 400822	400822	10.18730/2XK=	DLP 1573	Canabacoa		Dominican Republic	cey Al Medio	LandRace	19.40 N	70.50 W	205	y	y
CIP 400823	400823	10.18730/2XMU	DLP 1577	Mocanita		Dominican Republic	ca	LandRace	19.38 N	70.50 W	212
CIP 400824	400824	10.18730/2XN0	DLP 1579	Victor		Dominican Republic	Vega	LandRace	19.36 N	70.30 W	684
CIP 400825	400825	10.18730/2XP1	DLP 1580	La Cheche - Moradita		Dominican Republic	Vega	LandRace	19.36 N	70.30 W	684	y	y
CIP 400826	400826	10.18730/2XQ2	DLP 1584	unknown		Dominican Republic	nsenor Nouel	LandRace	19.34 N	70.32 W	433
CIP 400827	400827	10.18730/2XR3	DLP 1586	Andariega - A		Dominican Republic	nsenor Nouel	LandRace	19.34 N	70.32 W	433	y	y
CIP 400828	400828	10.18730/2XS4	DLP 1588	Andariega - B		Dominican Republic	nsenor Nouel	LandRace	19.34 N	70.32 W	433
CIP 400830	400830	10.18730/2XT5	DLP 1591	Hoja de Pancho		Dominican Republic	nsenor Nouel	LandRace	19.10 N	70.30 W	184	y	y
CIP 400832	400832	10.18730/2XV6	SOSA 2	Rinconera	19871125	Dominican Republic		LandRace				y	y
CIP 400833	400833	10.18730/2XW7	SOSA 6	Cincuenta Dias	19871125	Dominican Republic		LandRace				y
CIP 400834	400834	10.18730/2XX8	SOSA 8	Rabicana	19871125	Dominican Republic		LandRace
CIP 400835	400835	10.18730/2XY9	SOSA 9	Macorisana	19871125	Dominican Republic		LandRace				y
CIP 400836	400836	10.18730/2XZA	SOSA 10	Petronila	19871125	Dominican Republic		LandRace
CIP 400837	400837	10.18730/2Y0B	SOSA 12	Gurabera	19871125	Dominican Republic		LandRace
CIP 400838	400838	10.18730/2Y1C	SOSA 13	Roja de La Reforma	19871125	Dominican Republic		LandRace				y	y
CIP 400839	400839	10.18730/2Y2D	SOSA 14	Caco de Paloma	19871125	Dominican Republic		LandRace
CIP 400840	400840	10.18730/2Y3E	SOSA 15	Davo	19871125	Dominican Republic		LandRace				y
CIP 400841	400841	10.18730/2Y4F	SOSA 18	Crucita	19871125	Dominican Republic		LandRace
CIP 400842	400842	10.18730/2Y5G	SOSA 19	Moradita de Peralta	19871125	Dominican Republic		LandRace				y	y
CIP 400843	400843	10.18730/2Y6H	SOSA 20	Lorenzo	19871125	Dominican Republic		LandRace				y	y
CIP 400844	400844	10.18730/2Y7J	SOSA 21	Mantequilla	19871125	Dominican Republic		LandRace				y
CIP 400845	400845	10.18730/2Y8K	SOSA 22	Cantinera	19871125	Dominican Republic		LandRace
CIP 400846	400846	10.18730/2Y9M	SOSA 23	Envicia Raton	19871125	Dominican Republic		LandRace
CIP 400847	400847	10.18730/2YAN	SOSA 24	Pata De Gallina	19871125	Dominican Republic		LandRace
CIP 400848	400848	10.18730/2YBP	SOSA 25	La Amarillita	19871125	Dominican Republic		LandRace
CIP 400849	400849	10.18730/2YCQ	SOSA 28	Cano	19871125	Dominican Republic		LandRace				y	y
CIP 400850	400850	10.18730/2YDR	SOSA 29	Jaguita	19871125	Dominican Republic		LandRace				y	y
CIP 400851	400851	10.18730/2YES	SOSA 30	Chambrita	19871125	Dominican Republic		LandRace
CIP 400852	400852	10.18730/2YFT	SOSA 32	Mata Hambre	19871125	Dominican Republic		LandRace
CIP 400853	400853	10.18730/2YGV	SOSA 33	Yema de Huevo	19871125	Dominican Republic		LandRace
CIP 400854	400854	10.18730/2YHW	SOSA 34	Rabo de Mulo	19871125	Dominican Republic		LandRace
CIP 400855	400855	10.18730/2YJX	SOSA 35	Cornelia	19871125	Dominican Republic		LandRace
CIP 400856	400856	10.18730/2YKY	SOSA 36	Cuero de Maco	19871125	Dominican Republic		LandRace
CIP 400857	400857	10.18730/2YMZ	SOSA 38	Payera	19871125	Dominican Republic		LandRace
CIP 400858	400858	10.18730/2YN*	SOSA 40	Colora	19871125	Dominican Republic		LandRace				y	y
CIP 400859	400859	10.18730/2YP~	SOSA 41	Cibaita	19871125	Dominican Republic		LandRace				y	y
CIP 400860	400860	10.18730/2YQ$	SOSA 42	San Cristobera	19871125	Dominican Republic		LandRace				y
CIP 400861	400861	10.18730/2YR=	SOSA 44	Ubre de Vaca	19871125	Dominican Republic		LandRace
CIP 400862	400862	10.18730/2YSU	SOSA 46	Auxilio	19871125	Dominican Republic		LandRace
CIP 400863	400863	10.18730/2YT0	SOSA 47	Amina	19871125	Dominican Republic		LandRace				y	y
CIP 400864	400864	10.18730/2YV1	SOSA 48	La Palana Morada	19871125	Dominican Republic		LandRace				y	y
CIP 400865	400865	10.18730/2YW2	SOSA 49	Celestina	19871125	Dominican Republic		LandRace
CIP 400866	400866	10.18730/2YX3	SOSA 51	La Blanca	19871125	Dominican Republic		LandRace
CIP 400867	400867	10.18730/2YY4	SOSA 52	Agua Tibia	19871125	Dominican Republic		LandRace
CIP 400868	400868	10.18730/2YZ5	SOSA 54	Catalina	19871125	Dominican Republic		LandRace				y	y
CIP 400869	400869	10.18730/2Z06	SOSA 55	Chalona	19871125	Dominican Republic		LandRace
CIP 400870	400870	10.18730/2Z17	SOSA 56	La Piragua	19871125	Dominican Republic		LandRace
CIP 400871	400871	10.18730/2Z28	SOSA 57	Anama	19871125	Dominican Republic		LandRace				y	y
CIP 400872	400872	10.18730/2Z39	SOSA 58	La Chaco	19871125	Dominican Republic		LandRace				y	y
CIP 400873	400873	10.18730/2Z4A	SOSA 61	Variedad 61	19871125	Dominican Republic		LandRace
CIP 400874	400874	10.18730/2Z5B	SOSA 62	Variedad 62	19871125	Dominican Republic		LandRace
CIP 400875	400875	10.18730/2Z6C	SOSA 64	Variedad 64	19871125	Dominican Republic		LandRace
CIP 400876	400876	10.18730/2Z7D	SOSA 65	Variedad 65	19871125	Dominican Republic		LandRace
CIP 400877	400877	10.18730/2Z8E	SOSA V-13	Madame Sentado	19871125	Dominican Republic		LandRace				y
CIP 400878	400878	10.18730/2Z9F	SOSA V-15	W - 50 (Georgia-USA)	19871125	Dominican Republic		ImpVariety				y
CIP 400881	400881	10.18730/2ZAG	DLP 558	Cochinilla o Gallinazo	19850915	Ecuador	Pichincha	LandRace	0.10 S	79.20 W	1000
CIP 400883	400883	10.18730/2ZBH	DLP 560	Cargamento	19850915	Ecuador	Pichincha	LandRace	0.10 S	79.20 W	1000
CIP 400884	400884	10.18730/2ZCJ	DLP 562	Cargamento de Sal	19850915	Ecuador	Pichincha	LandRace	0.10 S	79.20 W	1000
CIP 400886	400886	10.18730/2ZDK	DLP 568	Jumbo	19850915	Ecuador	Pichincha	LandRace	0.20 S	79.30 W	1403
CIP 400887	400887	10.18730/2ZEM	DLP 574	unknown	19850915	Ecuador	Esmeralda	LandRace	0.20 N	79.30 W	7	y	y
CIP 400888	400888	10.18730/2ZFN	DLP 582	Amarillo	19850915	Ecuador	Esmeralda	LandRace	0.50 N	79.40 W	30
CIP 400889	400889	10.18730/2ZGP	DLP 599	Terremoto	19850915	Ecuador	Pichincha	LandRace	0.10 S	79.30 W	280	y	y
CIP 400893	400893	10.18730/2ZHQ	DLP 617	Morado	19850915	Ecuador	Guayas	LandRace	0.10 S	79.40 W	80	y	y
CIP 400894	400894	10.18730/2ZJR	DLP 622	unknown	19850915	Ecuador	Los Rios	LandRace	0.55 S	79.10 W	49	y
CIP 400895	400895	10.18730/2ZKS	DLP 627	unknown	19850915	Ecuador	Los Rios	LandRace	0.15 S	79.35 W	6	y	y
CIP 400896	400896	10.18730/2ZMT	DLP 628	unknown	19850915	Ecuador	Los Rios	LandRace	0.15 S	79.35 W	6
CIP 400897	400897	10.18730/2ZNV	DLP 631	Amarillo	19850915	Ecuador	Guayas	LandRace	0.22 S	79.30 W	10	y
CIP 400898	400898	10.18730/2ZPW	DLP 633	Morado	19850915	Ecuador	Guayas	LandRace	0.24 S	79.40 W	37
CIP 400899	400899	10.18730/2ZQX	DLP 1149	De Dulce		Ecuador	Napo	LandRace	0.10 S	77.40 W	1554
CIP 400900	400900	10.18730/2ZRY	DLP 1150	De Sal		Ecuador	Napo	LandRace	0.10 S	77.40 W	1554	y
CIP 400902	400902	10.18730/2ZSZ	DLP 1156	Amarilla		Ecuador	Napo	LandRace	0.10 S	76.55 W	321	y	y
CIP 400904	400904	10.18730/2ZT*	DLP 1158	Dulce		Ecuador	Napo	LandRace	0.10 S	76.55 W	314	y	y
CIP 400905	400905	10.18730/2ZV~	DLP 1160	Camotillo		Ecuador	Napo	LandRace	0.05 S	76.50 W	298	y
CIP 400906	400906	10.18730/2ZW$	DLP 1161	Jibaro		Ecuador	Napo	LandRace	0.05 S	77.30 W	481	y	y
CIP 400907	400907	10.18730/2ZX=	DLP 1162	Morado - Jibaro		Ecuador	Napo	LandRace	0.05 S	77.30 W	481	y	y
CIP 400908	400908	10.18730/2ZYU	DLP 1163	Blanco Dulce		Ecuador	Napo	LandRace	0.50 S	77.30 W	481
CIP 400909	400909	10.18730/2ZZ0	DLP 1164	Morado De Sal		Ecuador	Napo	LandRace	0.05 S	77.20 W	1290	y	y
CIP 400910	400910	10.18730/3001	DLP 1165	Dulce Blanco		Ecuador	Napo	LandRace	0.05 S	77.20 W	1290	y
CIP 400911	400911	10.18730/3012	DLP 1166	unknown		Ecuador	Napo	LandRace	0.05 S	76.50 W	1602	y	y
CIP 400912	400912	10.18730/3023	DLP 1168	Irizo		Ecuador	Napo	LandRace	0.40 S	77.50 W	2062
CIP 400913	400913	10.18730/3034	DLP 1169	Blanco de Dulce		Ecuador	Napo	LandRace	0.40 S	77.50 W	2062
CIP 400914	400914	10.18730/3045	DLP 1174	unknown		Ecuador	Napo	LandRace	1.00 S	77.58 W	583	y
CIP 400915	400915	10.18730/3056	DLP 1179	unknown		Ecuador	Napo	LandRace	1.15 S	77.58 W	517	y	y
CIP 400917	400917	10.18730/3067	DLP 1182	Comal		Ecuador	Napo	LandRace	1.00 S	77.55 W	771
CIP 400919	400919	10.18730/3078	DLP 1188	Amarillo		Ecuador	Napo	LandRace	0.50 S	77.50 W	410	y	y
CIP 400920	400920	10.18730/3089	DLP 1189	unknown		Ecuador	Napo	LandRace	0.50 S	77.52 W	512	y	y
CIP 400921	400921	10.18730/309A	DLP 1191	Amarillo		Ecuador	Napo	LandRace	1.10 S	77.50 W	334
CIP 400924	400924	10.18730/30AB	DLP 1199	Dulce		Ecuador	Pastaza	LandRace	1.34 S	77.54 W	1015	y	y
CIP 400925	400925	10.18730/30BC	DLP 1203	Blanco de Dulce		Ecuador	Pastaza	LandRace	1.30 S	78.06 W	943	y	y
CIP 400926	400926	10.18730/30CD	DLP 1204	De Dulce		Ecuador	Pastaza	LandRace	1.30 S	78.06 W	943	y	y
CIP 400927	400927	10.18730/30DE	DLP 1205	De Sal		Ecuador	Pastaza	LandRace	1.30 S	78.06 W	943	y	y
CIP 400929	400929	10.18730/30EF	DLP 1207	De Dulce		Ecuador	Pastaza	LandRace	1.28 S	78.08 W	960	y	y
CIP 400930	400930	10.18730/30FG	DLP 1208	De Sal		Ecuador	Pastaza	LandRace	1.28 S	78.08 W	960	y
CIP 400931	400931	10.18730/30GH	DLP 1209	unknown		Ecuador	Tungurahua	LandRace	1.28 S	78.08 W	1558	y	y
CIP 400933	400933	10.18730/30HJ	DLP 1211	unknown		Ecuador	Tungurahua	LandRace	1.28 S	78.08 W	1558	y
CIP 400935	400935	10.18730/30JK	DLP 1213	unknown		Ecuador	Tungurahua	LandRace	1.30 S	78.30 W	2084	y
CIP 400936	400936	10.18730/30KM	DLP 1215	Morado		Ecuador	Tungurahua	LandRace	1.35 S	78.35 W	2200		y
CIP 400939	400939	10.18730/30MN	DLP 1223	unknown		Ecuador	Canar	LandRace	2.35 S	79.30 W	63	y
CIP 400941	400941	10.18730/30PQ	DLP 1231	Camote de Dulce		Ecuador	Morona	LandRace	3.30 S	78.35 W	986	y	y
CIP 400942	400942	10.18730/30QR	DLP 1233	unknown		Ecuador	Morona	LandRace	3.30 S	78.35 W	779
CIP 400943	400943	10.18730/30RS	DLP 1235	unknown		Ecuador	Zamora	LandRace	3.40 S	78.30 W	851	y	y
CIP 400945	400945	10.18730/30ST	DLP 1239	Dulce		Ecuador	Zamora	LandRace	3.50 S	78.50 W	1037	y	y
CIP 400947	400947	10.18730/30TV	DLP 1243	unknown		Ecuador	Zamora	LandRace	3.35 S	78.40 W	872	y
CIP 400948	400948	10.18730/30VW	DLP 1249	unknown		Ecuador	Zamora	LandRace	4.05 S	78.55 W	941	y	y
CIP 400949	400949	10.18730/30WX	DLP 1257	unknown		Ecuador	Loja	LandRace	3.40 S	79.35 W	2077	y	y
CIP 400950	400950	10.18730/30XY	DLP 1258	Morado		Ecuador	Loja	LandRace	3.40 S	79.40 W	1650
CIP 400951	400951	10.18730/30YZ	DLP 1264	Camote Dulce		Ecuador	El Oro	LandRace	3.40 S	79.55 W	610
CIP 400953	400953	10.18730/30Z*	DLP 1266	De Dulce		Ecuador	El Oro	LandRace	3.35 S	79.45 W	256
CIP 400954	400954	10.18730/310~	DLP 1274	Amarillo		Ecuador	El Oro	LandRace	3.38 S	79.45 W	17
CIP 400955	400955	10.18730/311$	DLP 1275	Blanco De Sal		Ecuador	El Oro	LandRace	3.40 S	79.45 W	1084	y	y
CIP 400956	400956	10.18730/312=	DLP 1276	Morado		Ecuador	El Oro	LandRace	3.40 S	79.45 W	1084	y	y
CIP 400957	400957	10.18730/313U	DLP 1278	Blanco		Ecuador	El Oro	LandRace	3.40 S	79.50 W	331	y	y
CIP 400958	400958	10.18730/3140	DLP 1292	Camote		Ecuador	Los Rios	LandRace	2.10 S	79.40 W	140
CIP 400960	400960	10.18730/3162	DLP 1296	unknown		Ecuador	Pichincha	LandRace	0.30 S	79.25 W	280	y	y
CIP 400962	400962	10.18730/3173	DLP 1390	Blanco		Ecuador	Ibabura	LandRace	0.40 S	78.10 W	1880	y	y
CIP 400963	400963	10.18730/3184	DLP 1392	Irizo		Ecuador	Carchi	LandRace	0.30 N	78.10 W	2480
CIP 400964	400964	10.18730/3195	DLP 1394	Cascabel		Ecuador	Carchi	LandRace	0.30 N	78.10 W	2480	y	y
CIP 400965	400965	10.18730/31A6	DLP 1396	Irizo Blanco		Ecuador	Carchi	LandRace	0.30 N	78.10 W	2480
CIP 400966	400966	10.18730/31B7	DLP 1397	Niguilla		Ecuador	Carchi	LandRace	0.30 N	78.10 W	2480	y	y
CIP 400967	400967	10.18730/31C8	DLP 1399	Papa Negra		Ecuador	Carchi	LandRace	0.35 S	78.30 W	2869	y
CIP 400968	400968	10.18730/31D9	DLP 1400	Vera		Ecuador	Carchi	LandRace	0.35 N	71.30 W	2869	y	y
CIP 400969	400969	10.18730/31EA	DLP 1401	Papa Amarilla		Ecuador	Carchi	LandRace	0.35 N	71.30 W	2869	y
CIP 400970	400970	10.18730/31FB	DLP 1403	Vasquez		Ecuador	Carchi	LandRace	0.35 N	71.30 W	2869	y
CIP 400971	400971	10.18730/31GC	DLP 1404	Morado		Ecuador	Carchi	LandRace	0.35 N	71.30 W	2869	y	y
CIP 400972	400972	10.18730/31HD	DLP 1405	Irizo Blanco		Ecuador	Carchi	LandRace	0.55 N	78.15 W	2374	y	y
CIP 400973	400973	10.18730/31JE	DLP 1406	Blanco		Ecuador	Imbabura	LandRace	0.20 N	78.05 W	2850	y	y
CIP 400974	400974	10.18730/31KF	DLP 1407	Camote Papa		Ecuador	Imbabura	LandRace	0.20 N	78.05 W	2850	y	y
CIP 400975	400975	10.18730/31MG	DLP 1408	Camote Leche		Ecuador	Imbabura	LandRace	0.20 N	78.05 W	2850	y
CIP 400976	400976	10.18730/31NH	DLP 1409	Moradilla		Ecuador	Imbabura	LandRace	0.20 N	78.05 W	2850	y
CIP 400977	400977	10.18730/31PJ	DLP 1410	Morado		Ecuador	Imbabura	LandRace	0.30 N	77.50 W	2703	y	y
CIP 400978	400978	10.18730/31QK	DLP 1411	Cascabel		Ecuador	Imbabura	LandRace	0.30 N	77.50 W	2703
CIP 400979	400979	10.18730/31RM	DLP 1412	El Virrey		Ecuador	Imbarura	LandRace	0.30 N	77.55 W	1810
CIP 400981	400981	10.18730/31SN	DLP 1416	Irizo Colorado		Ecuador	Carchi	LandRace	0.30 N	78.05 W	2869	y	y
CIP 400982	400982	10.18730/31TP	DLP 1417	Tresmesino		Ecuador	Carchi	LandRace	0.30 N	78.05 W	2869	y	y
CIP 400983	400983	10.18730/31VQ	DLP 1418	Zancudo Blanco		Ecuador	Carchi	LandRace	0.30 N	78.05 W	2869	y	y
CIP 400984	400984	10.18730/31WR	DLP 1419	Alvarito		Ecuador	Carchi	LandRace	0.30 N	78.00 W	2869	y	y
CIP 400985	400985	10.18730/31XS	DLP 1420	Pata De Gallo		Ecuador	Pichincha	LandRace	0.10 S	78.20 W	2728	y	y
CIP 400986	400986	10.18730/31YT	DLP 1421	Jumbo		Ecuador	Pichincha	LandRace	0.10 S	78.20 W	2728	y
CIP 400987	400987	10.18730/31ZV	DLP 1422	Guayaco		Ecuador	Pichincha	LandRace	0.10 S	78.20 W	2728	y	y
CIP 400988	400988	10.18730/320W	DLP 1423	Jumbo		Ecuador	Pichincha	LandRace	0.10 S	78.20 W	2728
CIP 400989	400989	10.18730/321X	DLP 1424	Ibarreno		Ecuador	Pichincha	LandRace	0.10 S	78.20 W	2728
CIP 400990	400990	10.18730/322Y	DLP 1425	unknown		Ecuador	Pichincha	LandRace	0.10 S	78.20 W	2728	y	y
CIP 400991	400991	10.18730/323Z	DLP 1426	Polvarron		Ecuador	Pichincha	LandRace	0.50 S	78.10 W	1816	y	y
CIP 400992	400992	10.18730/324*	DLP 1427	Manteco		Ecuador	Pichincha	LandRace	0.05 S	78.10 W	1816
CIP 400993	400993	10.18730/325~	DLP 1429	Porotillo		Ecuador	Pichincha	LandRace	0.05 S	78.10 W	1816
CIP 400994	400994	10.18730/326$	DLP 1430	Coleno		Ecuador	Pichincha	LandRace	0.05 S	78.10 W	1816	y
CIP 400995	400995	10.18730/327=	DLP 1431	Zapallo		Ecuador	Pichincha	LandRace	0.05 S	78.10 W	1816	y	y
CIP 400996	400996	10.18730/328U	DLP 1433	Coleno		Ecuador	Pichincha	LandRace	0.05 S	78.10 W	1816
CIP 400997	400997	10.18730/3290	DLP 1434	Negro		Ecuador	Pichincha	LandRace	0.10 S	78.20 W	2809	y	y
CIP 400998	400998	10.18730/32A1	DLP 1435	Blanco Papa		Ecuador	Pichincha	LandRace	0.10 S	78.20 W	2809	y	y
CIP 400999	400999	10.18730/32B2	DLP 1437	Morado Dulce		Ecuador	Imbabura	LandRace	0.10 S	78.10 W	3139
CIP 401000	401000	10.18730/32C3	DLP 1438	Morado		Ecuador	Pichincha	LandRace	0.10 S	78.20 W	3080
CIP 401001	401001	10.18730/32D4	DLP 1439	Camote Dulce		Ecuador	Pichincha	LandRace	0.10 S	78.25 W	2328	y	y
CIP 401002	401002	10.18730/32E5	DLP 1440	Inteno Negro		Ecuador	Pichincha	LandRace	0.05 S	78.30 W	2095	y
CIP 401003	401003	10.18730/32F6	DLP 1441	Camote De Sal		Ecuador	Pichincha	LandRace	0.05 S	78.30 W	2095	y	y
CIP 401004	401004	10.18730/32G7	DLP 1442	Cargamento		Ecuador	Pichincha	LandRace	1.10 N	78.25 W	2142	y	y
CIP 401005	401005	10.18730/32H8	DLP 1443	Jumbo Dulce o Tanda		Ecuador	Pichincha	LandRace	1.10 N	78.25 W	2142
CIP 401006	401006	10.18730/32J9	DLP 1444	unknown		Ecuador	Pichincha	LandRace	1.10 N	78.25 W	2142
CIP 401007	401007	10.18730/32KA	DLP 1445	Zapallo Dulce		Ecuador	Pichincha	LandRace	1.10 N	78.25 W	2142
CIP 401008	401008	10.18730/32MB	DLP 1446	Banos		Ecuador	Pichincha	LandRace	1.10 N	78.25 W	2142
CIP 401009	401009	10.18730/32NC	DLP 1447	unknown		Ecuador	Pichincha	LandRace	1.15 N	78.35 W	2198	y	y
CIP 401010	401010	10.18730/32PD	DLP 1449	Gallinazo		Ecuador	Pichincha	LandRace	1.15 N	78.35 W	2198	y
CIP 401011	401011	10.18730/32QE	DLP 1450	Cargamento Dulce		Ecuador	Pichincha	LandRace	0.03 N	78.30 W	2009	y	y
CIP 401012	401012	10.18730/32RF	DLP 1451	Camote Papa		Ecuador	Pichincha	LandRace	0.03 N	78.30 W	2009
CIP 401013	401013	10.18730/32SG	DLP 1452	Peseta		Ecuador	Pichincha	LandRace	0.05 N	78.25 W	2110
CIP 401014	401014	10.18730/32TH	DLP 1453	Blanco		Ecuador	Tungurahua	LandRace	1.20 S	78.30 W	2337	y	y
CIP 401015	401015	10.18730/32VJ	DLP 1454	Morado		Ecuador	Tungurahua	LandRace	1.20 S	78.30 W	2337	y	y
CIP 401016	401016	10.18730/32WK	DLP 1455	Amarillo		Ecuador	Tungurahua	LandRace	1.20 S	78.30 W	2337	y	y
CIP 401017	401017	10.18730/32XM	DLP 1456	unknown		Ecuador	Tungurahua	LandRace	1.25 S	78.25 W	2205	y
CIP 401018	401018	10.18730/32YN	DLP 1457	La Leona		Ecuador	Tungurahua	LandRace	1.20 S	78.30 W	2948
CIP 401019	401019	10.18730/32ZP	DLP 1458	Baneno		Ecuador	Tungurahua	LandRace	1.20 S	78.20 W	2399	y	y
CIP 401020	401020	10.18730/330Q	DLP 1459	Camote Dulce		Ecuador	Tungurahua	LandRace	1.25 S	78.35 W	2210	y	y
CIP 401021	401021	10.18730/331R	DLP 1460	De Sal		Ecuador	Bolivar	LandRace	1.40 S	79.05 W	2466	y	y
CIP 401022	401022	10.18730/332S	DLP 1463	Blanco Dulce		Ecuador	Chimborazo	LandRace	2.10 S	78.50 W	3135	y	y
CIP 401023	401023	10.18730/333T	DLP 1466	Coto		Ecuador	Chimborazo	LandRace	2.10 S	78.55 W	1296	y	y
CIP 401024	401024	10.18730/334V	DLP 1467	Guabalqueno		Ecuador	Chimborazo	LandRace	2.10 S	78.55 W	1296
CIP 401025	401025	10.18730/335W	DLP 1468	Dulce		Ecuador	Chimborazo	LandRace	2.10 S	78.55 W	1296	y	y
CIP 401026	401026	10.18730/336X	DLP 1475	De Sal		Ecuador	Azuay	LandRace	2.50 S	78.40 W	2190
CIP 401027	401027	10.18730/337Y	DLP 1476	De Dulce		Ecuador	Azuay	LandRace	2.50 S	78.40 W	2190	y	y
CIP 401028	401028	10.18730/338Z	DLP 1477	Cochinilla		Ecuador	Azuay	LandRace	2.45 S	78.40 W	2398
CIP 401029	401029	10.18730/339*	DLP 1478	Manga		Ecuador	Azuay	LandRace	2.45 S	78.40 W	2398	y	y
CIP 401030	401030	10.18730/33A~	DLP 1479	Chilca Dulce		Ecuador	Azuay	LandRace	2.45 S	78.40 W	2398
CIP 401031	401031	10.18730/33B$	DLP 1480	Cambray Dulce		Ecuador	Azuay	LandRace	2.45 S	78.40 W	2398	y	y
CIP 401032	401032	10.18730/33C=	DLP 1484	Bunuelo		Ecuador	Azuay	LandRace	3.10 S	79.05 W	2391
CIP 401033	401033	10.18730/33DU	DLP 1485	Algodoncito		Ecuador	Azuay	LandRace	3.10 S	79.05 W	2391	y
CIP 401034	401034	10.18730/33E0	DLP 1486	Morado de Dulce		Ecuador	Azuay	LandRace	3.10 S	79.05 W	2391	y	y
CIP 401035	401035	10.18730/33F1	DLP 1487	Morado de Dulce		Ecuador	Azuay	LandRace	3.10 S	79.10 W	2391
CIP 401036	401036	10.18730/33G2	DLP 1488	Blanco de Dulce		Ecuador	Azuay	LandRace	3.10 S	79.10 W	2391	y	y
CIP 401037	401037	10.18730/33H3	DLP 1489	Amarillo de Dulce		Ecuador	Azuay	LandRace	3.10 S	79.10 W	2391
CIP 401038	401038	10.18730/33J4	DLP 1490	Blanco De Sal		Ecuador	Azuay	LandRace	3.10 S	79.10 W	2391	y	y
CIP 401039	401039	10.18730/33K5	DLP 1491	Colorado de Sal		Ecuador	Azuay	LandRace	3.10 S	79.10 W	2391	y	y
CIP 401040	401040	10.18730/33M6	DLP 1493	Morado Sal		Ecuador	Azuay	LandRace	3.20 S	79.20 W	1040
CIP 401041	401041	10.18730/33N7	DLP 1494	Blanco Dulce		Ecuador	Azuay	LandRace	3.20 S	79.20 W	1040	y	y
CIP 401042	401042	10.18730/33P8	DLP 1495	De Sal		Ecuador	Azuay	LandRace	3.20 S	79.25 W	740	y
CIP 401043	401043	10.18730/33Q9	DLP 1498	Camote Dulce		Ecuador	El Oro	LandRace	3.25 S	79.38 W	154
CIP 401045	401045	10.18730/33RA	DLP 1500	Manaba de Dulce		Ecuador	Los Rios	LandRace	0.55 S	79.25 W	420
CIP 401046	401046	10.18730/33SB	DLP 1501	unknown		Ecuador	Pichincha	LandRace	0.20 S	79.10 W	577	y	y
CIP 401048	401048	10.18730/33TC	CATIE 6080	Unknown	19860618	Guatemala		LandRace
CIP 401049	401049	10.18730/33VD	CATIE 6645	Unknown	19860618	Guatemala		LandRace
CIP 401050	401050	10.18730/33WE	CATIE 7722	Unknown	19860618	Guatemala		LandRace
CIP 401051	401051	10.18730/33XF	CATIE 7723	Unknown	19860618	Guatemala		LandRace
CIP 401052	401052	10.18730/33YG	GTM 57	Camote Morado	19890225	Guatemala	Santa Rosa	LandRace	14.23 N	90.17 W	1038	y	y
CIP 401053	401053	10.18730/33ZH	GTM 75	Camote Morado	19890225	Guatemala	Progreso	LandRace	14.54 N	89.53 W	246	y	y
CIP 401054	401054	10.18730/340J	GTM 143	Unknown	19890225	Guatemala	Progreso	LandRace	14.44 N	90.07 W	794
CIP 401055	401055	10.18730/341K	GTM 313	Camote Blanco	19890225	Guatemala	Jutiapa	LandRace	14.17 N	89.49 W	1295	y	y
CIP 401056	401056	10.18730/342M	GTM 326	Camote Blanco	19890225	Guatemala	Jutiapa	LandRace	14.20 N	89.42 W	549	y	y
CIP 401057	401057	10.18730/343N	GTM 333	Unknown	19890225	Guatemala	Jutiapa	LandRace	14.20 N	89.42 W	549
CIP 401060	401060	10.18730/344P	GTM 367	Camote Morado	19890225	Guatemala	Peten	LandRace	16.48 N	89.58 W	207
CIP 401062	401062	10.18730/345Q	GTM 384	Camote Moral	19890225	Guatemala	Peten	LandRace	16.32 N	90.18 W	496
CIP 401065	401065	10.18730/346R	GTM 391	Camote Blanco	19890225	Guatemala	Peten	LandRace	17.02 N	89.55 W	115	y	y
CIP 401066	401066	10.18730/347S	GTM 392	Camote Morado	19890225	Guatemala	Peten	LandRace	17.02 N	89.55 W	115
CIP 401067	401067	10.18730/348T	GTM 406	Camote Morado	19890225	Guatemala	Peten	LandRace	17.09 N	89.09 W	365	y	y
CIP 401068	401068	10.18730/349V	GTM 411	Camote Morado	19890225	Guatemala	Peten	LandRace	16.27 N	89.17 W	390	y	y
CIP 401069	401069	10.18730/34AW	GTM 412	Camote Morado	19890225	Guatemala	Peten	LandRace	16.27 N	89.17 W	390	y	y
CIP 401071	401071	10.18730/34BX	GTM 434	Camote Morado	19890225	Guatemala	Izabal	LandRace	15.32 N	88.43 W	15
CIP 401072	401072	10.18730/34CY	GTM 440	Camote Morado	19890225	Guatemala	Izabal	LandRace	15.46 N	89.81 W	10	y	y
CIP 401073	401073	10.18730/34DZ	GTM 441	Camote Remola	19890225	Guatemala	Izabal	LandRace	15.46 N	89.81 W	10
CIP 401074	401074	10.18730/34E*	GTM 443	Camote Morado	19890225	Guatemala	Izabal	LandRace	15.46 N	89.81 W	10	y	y
CIP 401075	401075	10.18730/34F~	GTM 445	Camote Morado	19890225	Guatemala	Izabal	LandRace	15.46 N	89.08 W	7
CIP 401076	401076	10.18730/34G$	GTM 459	Camote Amarillo	19890225	Guatemala	Izabal	LandRace	15.31 N	89.20 W	100
CIP 401077	401077	10.18730/34H=	GTM 469	Camote Morado	19890225	Guatemala	Alta Verapaz	LandRace	15.23 N	89.43 W	585	y	y
CIP 401078	401078	10.18730/34JU	GTM 476	Camote Morado	19890225	Guatemala	Alta Verapaz	LandRace	15.25 N	89.45 W	110	y	y
CIP 401079	401079	10.18730/34K0	GTM 494	Camote Blanco	19890225	Guatemala	Sacatepequez	LandRace	14.32 N	90.46 W	1473
CIP 401081	401081	10.18730/34M1	GTM 504	Camote Amarillo	19890225	Guatemala	Chimaltenango	LandRace	14.37 N	90.50 W	1982	y	y
CIP 401082	401082	10.18730/34N2	GTM 507	Camote Morado	19890225	Guatemala	Baja Verapaz	LandRace			1319	y
CIP 401083	401083	10.18730/34P3	GTM 508	Camote	19890225	Guatemala	Santa Rosa	LandRace			1004
CIP 401084	401084	10.18730/34Q4	GTM 512	Camote Morado	19890225	Guatemala	Peten	LandRace	16.20 N	90.15 W	180	y	y
CIP 401085	401085	10.18730/34R5	GTM 514	Unknown	19890225	Guatemala	Peten	LandRace	16.20 N	90.15 W	180
CIP 401086	401086	10.18730/34S6	GTM 516	Camote Morado	19890225	Guatemala	Peten	LandRace	16.20 N	90.15 W	180	y
CIP 401087	401087	10.18730/34T7	GTM 530	Camote Morado	19890225	Guatemala	Peten	LandRace	16.40 N	90.16 W	120
CIP 401088	401088	10.18730/34V8	GTM 531	Camote Blanco	19890225	Guatemala	Peten	LandRace	16.39 N	90.45 W	140	y	y
CIP 401089	401089	10.18730/34W9	GTM 540	Camote Injerto	19890225	Guatemala	Peten	LandRace	16.30 N	90.11 W	220	y	y
CIP 401090	401090	10.18730/34XA	GTM 543	Unknown	19890225	Guatemala	Peten	LandRace	16.30 N	90.11 W	220
CIP 401091	401091	10.18730/34YB	GTM 568	Unknown	19890225	Guatemala	Peten	LandRace	16.30 N	90.11 W	220
CIP 401092	401092	10.18730/34ZC	GTM 573	Camote Blanco	19890225	Guatemala	Peten	LandRace	17.00 N	89.28 W	180
CIP 401093	401093	10.18730/350D	GTM 578	Camote Morado	19890225	Guatemala	Peten	LandRace	17.00 N	89.26 W	286	y
CIP 401094	401094	10.18730/351E	GTM 593	Camote Amarillo	19890225	Guatemala	Peten	LandRace	16.57 N	89.29 W	400
CIP 401095	401095	10.18730/352F	GTM 594	Camote Morado	19890225	Guatemala	Peten	LandRace	16.57 N	89.29 W	400
CIP 401096	401096	10.18730/353G	GTM 600	Camote Blanco	19890225	Guatemala	Peten	LandRace	16.15 N	89.24 W	472
CIP 401097	401097	10.18730/354H	GTM 609	Camote Morado	19890225	Guatemala	Peten	LandRace	16.20 N	90.12 W	126	y
CIP 401099	401099	10.18730/355J	GTM 623	Camote Blanco	19890225	Guatemala	Izabal	LandRace	15.32 N	88.40 W	37
CIP 401100	401100	10.18730/356K	GTM 624	Camote Blanco	19890225	Guatemala	Izabal	LandRace	15.28 N	89.49 W	40	y	y
CIP 401101	401101	10.18730/357M	GTM 625	Camote Rojo	19890225	Guatemala	Izabal	LandRace	15.28 N	88.49 W	40
CIP 401103	401103	10.18730/358N	GTM 644	Unknown	19890225	Guatemala	Guatemala	LandRace	15.28 N	88.49 W		y
CIP 401104	401104	10.18730/359P	GTM 646	Camote Naranja	19890225	Guatemala	Guatemala	LandRace	14.31 N	90.35 W	1935
CIP 401105	401105	10.18730/35AQ	GTM 682	Camote Morado	19890225	Guatemala	Chimaltenango	LandRace	14.29 N	90.57 W	1778	y
CIP 401106	401106	10.18730/35BR	GTM 704	Camote Morado	19890225	Guatemala	Chimaltenango	LandRace	14.49 N	90.54 W	1950	y
CIP 401107	401107	10.18730/35CS	GTM 707	Unknown	19890225	Guatemala	Chimaltenango	LandRace	14.49 N	90.54 W		y
CIP 401108	401108	10.18730/35DT	GTM 709	Camote Morado	19890225	Guatemala	El Progreso	LandRace	14.45 N	90.13 W	924
CIP 401109	401109	10.18730/35EV	GTM 754	Unknown	19890225	Guatemala	El Progreso	LandRace	14.45 N	90.13 W	924	y	y
CIP 401110	401110	10.18730/35FW	GTM 832	Camote Morado	19890225	Guatemala	San Marcos	LandRace	14.50 N	92.08 W	129
CIP 401111	401111	10.18730/35GX	GTM 842	Camote Morado	19890225	Guatemala	San Marcos	LandRace	14.30 N	91.50 W	117
CIP 401112	401112	10.18730/35HY	GTM 895	Camote Morado	19890225	Guatemala	Escuintla	LandRace	14.11 N	91.18 W	60	y
CIP 401113	401113	10.18730/35JZ	GTM 914	Camote Amarillo	19890225	Guatemala	Suchitepequez	LandRace	14.23 N	90.35 W	95	y	y
CIP 401114	401114	10.18730/35K*	GTM 922	Is	19890225	Guatemala	Alta Verapaz	LandRace	15.19 N	89.54 W	93	y	y
CIP 401115	401115	10.18730/35M~	GTM 934	Camote Morado	19890225	Guatemala	Alta Verapaz	LandRace	15.50 N	89.44 W	200
CIP 401116	401116	10.18730/35N$	GTM 940	Camote Morado	19890225	Guatemala	Quiche	LandRace	15.56 N	90.47 W	220
CIP 401117	401117	10.18730/35P=	GTM 941	Camote Rosado	19890225	Guatemala	Quiche	LandRace	15.56 N	90.47 W	220
CIP 401118	401118	10.18730/35QU	GTM 946	Camote Morado	19890225	Guatemala	Baja Verapaz	LandRace	15.14 N	90.14 W	2001
CIP 401119	401119	10.18730/35R0	GTM 948	Camote Morado	19890225	Guatemala	Baja Verapaz	LandRace	15.03 N	90.14 W	1097
CIP 401120	401120	10.18730/35S1	GTM 949	Camote Blanco	19890225	Guatemala	Baja Verapaz	LandRace	15.03 N	90.14 W	1097
CIP 401121	401121	10.18730/35T2	GTM 950	Camote Morado	19890225	Guatemala	Baja Verapaz	LandRace	15.03 N	90.14 W	1097	y	y
CIP 401122	401122	10.18730/35V3	GTM 959	Camote Blanco	19890225	Guatemala	Baja Verapaz	LandRace	15.04 N	90.39 W	1000	y	y
CIP 401123	401123	10.18730/35W4	GTM 983	Camote Anaranjado	19890225	Guatemala	Chimaltenango	LandRace	14.33 N	91.06 W	1036	y	y
CIP 401124	401124	10.18730/35X5	GTM 993	Camote Blanco	19890225	Guatemala	Solola	LandRace	14.38 N	91.12 W	1624	y	y
CIP 401125	401125	10.18730/35Y6	GTM 1021	Camote Morado	19890225	Guatemala	Escuintla	LandRace	13.02 N	90.57 W	14
CIP 401126	401126	10.18730/35Z7	GTM 1029	Camote Morado	19890225	Guatemala	Alta Verapaz	LandRace	15.47 N	90.18 W	777
CIP 401127	401127	10.18730/3608	GTM 1033	Camote Morado	19890225	Guatemala	Alta Verapaz	LandRace	15.53 N	90.13 W	306	y	y
CIP 401128	401128	10.18730/3619	GTM 1034	Camote Morado	19890225	Guatemala	Alta Verapaz	LandRace	15.53 N	90.13 W	306
CIP 401129	401129	10.18730/362A	GTM 1042	Camote Blanco	19890225	Guatemala	Alta Verapaz	LandRace	15.26 N	90.17 W	1371	y
CIP 401130	401130	10.18730/363B	GTM 1108	Camote Morado	19890225	Guatemala	Quiche	LandRace	14.59 N	90.59 W	1914	y
CIP 401132	401132	10.18730/364C	GTM 1120	Camote Amarillo	19890225	Guatemala	Quiche	LandRace	15.18 N	91.04 W	1914	y	y
CIP 401134	401134	10.18730/365D	GTM 1134	Camote Morado	19890225	Guatemala	Huehuetenango	LandRace	15.54 N	91.57 W	1080
CIP 401135	401135	10.18730/366E	GTM 1172	Camote Blanco	19890225	Guatemala	Quiche	LandRace	15.10 N	90.51 W	1231	y
CIP 401136	401136	10.18730/367F	GTM 1176	Is Blanco	19890225	Guatemala	Solola	LandRace	14.31 N	91.15 W	1600	y	y
CIP 401137	401137	10.18730/368G	GTM CAMP	Campana Cahabon	19890225	Guatemala		LandRace
CIP 401138	401138	10.18730/369H	GTM CHNA	China A	19890225	Guatemala		LandRace
CIP 401139	401139	10.18730/36AJ	GTM CHNB	Chino B	19890225	Guatemala		LandRace				y	y
CIP 401140	401140	10.18730/36BK	GTM MORA	Morado Progreso	19890225	Guatemala		LandRace
CIP 401141	401141	10.18730/36CM	GTM SANS	Sansare	19890225	Guatemala		LandRace				y
CIP 401142	401142	10.18730/36DN	GTM STRA	Santa Rosa A	19890225	Guatemala		LandRace				y	y
CIP 401143	401143	10.18730/36EP	I00078	PI 259164	19910927	Guatemala		LandRace
CIP 401144	401144	10.18730/36FQ	I00175	I 78-2	19910927	Guatemala		LandRace				y
CIP 401145	401145	10.18730/36GR	I01385	Unknown	19910927	Guatemala		LandRace
CIP 401146	401146	10.18730/36HS	I01435	Col. 540	19910927	Guatemala		LandRace				y
CIP 401147	401147	10.18730/36JT	CATIE10880	Unknown	19860618	Honduras		LandRace				y	y
CIP 401148	401148	10.18730/36KV	CATIE10996	Unknown	19860618	Honduras		LandRace				y	y
CIP 401149	401149	10.18730/36MW	CATIE12177	Unknown	19860618	Honduras		LandRace
CIP 401150	401150	10.18730/36NX	DLP 4494	Dos Semanas		Honduras	Atlantida	LandRace	15.48 N	87.23 W	162	y	y
CIP 401151	401151	10.18730/36PY	DLP 4521	Morado		Honduras	Atlantida	LandRace	15.48 N	87.36 W	48	y	y
CIP 401152	401152	10.18730/36QZ	DLP 4540	Rojo		Honduras	Atlantida	LandRace	15.48 N	87.38 W	9
CIP 401153	401153	10.18730/36R*	DLP 4545	Amarillo		Honduras	Atlantida	LandRace	15.48 N	87.38 W	9	y	y
CIP 401154	401154	10.18730/36S~	DLP 4558	Unknown		Honduras	Cortes	LandRace	15.37 N	87.56 W	41	y	y
CIP 401169	401169	10.18730/36T$	DLP 3180	Herbie		Jamaica	An	LandRace	18.20 N	77.10 W	477	y
CIP 401170	401170	10.18730/36V=	DLP 3182	Watson		Jamaica	An	LandRace	18.20 N	77.10 W	477	y	y
CIP 401171	401171	10.18730/36WU	DLP 3183	Round Slip		Jamaica	An	LandRace	18.35 N	77.15 W	510	y	y
CIP 401172	401172	10.18730/36X0	DLP 3185	Browns Town		Jamaica	An	LandRace	18.35 N	77.15 W	510	y
CIP 401173	401173	10.18730/36Y1	DLP 3190	Amos		Jamaica	Maschester	LandRace	18.02 N	77.30 W	645	y
CIP 401174	401174	10.18730/36Z2	DLP 3191	Big Leaf Blue Bud		Jamaica	Maschester	LandRace	18.02 N	77.30 W	731	y	y
CIP 401175	401175	10.18730/3703	DLP 3192	Ten Weeks		Jamaica	Maschester	LandRace	18.02 N	77.30 W	731	y	y
CIP 401176	401176	10.18730/3714	DLP 3193	Blue Bud		Jamaica	Maschester	LandRace	18.02 N	77.30 W	731	y	y
CIP 401177	401177	10.18730/3725	DLP 3194	Facey		Jamaica	Maschester	LandRace	18.02 N	77.30 W	814	y	y
CIP 401178	401178	10.18730/3736	DLP 3195	Cock Up		Jamaica	Maschester	LandRace	18.02 N	77.30 W	814
CIP 401179	401179	10.18730/3747	DLP 3196	Flogall		Jamaica	. Elizabeth	LandRace	18.10 N	77.40 W	17	y	y
CIP 401180	401180	10.18730/3758	DLP 3197	unknown		Jamaica	. Elizabeth	LandRace	18.10 N	77.40 W	17	y
CIP 401181	401181	10.18730/3769	DLP 3198	Pickney Mother		Jamaica	. Elizabeth	LandRace	18.15 N	77.40 W	40
CIP 401182	401182	10.18730/377A	DLP 3199	Santa Cruz		Jamaica	. Elizabeth	LandRace	18.15 N	77.40 W	40	y
CIP 401183	401183	10.18730/378B	DLP 3205	Horse Money		Jamaica	Clarendon	LandRace	18.05 N	77.10 W	401	y	y
CIP 401184	401184	10.18730/379C	DLP 3206	Sigies Short Internode		Jamaica	Clarendon	LandRace	18.05 N	77.10 W	401
CIP 401185	401185	10.18730/37AD	DLP 3207	Scissors		Jamaica	Clarendon	LandRace	18.05 N	77.10 W	401	y
CIP 401186	401186	10.18730/37BE	DLP 3209	Matty		Jamaica	Clarendon	LandRace	18.05 N	77.10 W	401	y	y
CIP 401187	401187	10.18730/37CF	DLP 3210	Sigies Long Internode		Jamaica	Clarendon	LandRace	18.05 N	77.10 W	401
CIP 401188	401188	10.18730/37DG	DLP 3211	Clipper		Jamaica	Clarendon	LandRace	18.00 N	77.05 W	544
CIP 401189	401189	10.18730/37EH	DLP 3213	Mother Edward		Jamaica	Clarendon	LandRace	18.02 N	77.00 W	823	y	y
CIP 401190	401190	10.18730/37FJ	DLP 3215	Pearl		Jamaica	Clarendon	LandRace	18.02 N	77.00 W	823	y	y
CIP 401191	401191	10.18730/37GK	DLP 3216	Flog a Dog		Jamaica	Clarendon	LandRace	18.02 N	77.00 W	823
CIP 401192	401192	10.18730/37HM	DLP 3217	Nylon		Jamaica	Clarendon	LandRace	18.02 N	77.00 W	823	y	y
CIP 401193	401193	10.18730/37JN	DLP 3222	Finney		Jamaica	Catherin	LandRace	18.00 N	77.00 W	11	y
CIP 401194	401194	10.18730/37KP	DLP 3231	Six Weeks		Jamaica	Catherin	LandRace	18.00 N	77.00 W	11	y	y
CIP 401195	401195	10.18730/37MQ	DLP 3240	V. White		Jamaica	Catherin	LandRace	18.00 N	77.00 W	11	y	y
CIP 401196	401196	10.18730/37NR	DLP 3255	unknown		Jamaica	Catherin	LandRace	17.55 N	77.02 W	160	y	y
CIP 401197	401197	10.18730/37PS	DLP 3256	Hawk		Jamaica	Catherin	LandRace	17.55 N	77.02 W	160
CIP 401198	401198	10.18730/37QT	DLP 3257	unknown		Jamaica	Catherin	LandRace	17.50 N	77.02 W	226
CIP 401199	401199	10.18730/37RV	DLP 3258	Clarendon Coby		Jamaica	Catherin	LandRace	17.50 N	77.02 W	226	y	y
CIP 401200	401200	10.18730/37SW	DLP 3260	Rhoden		Jamaica	Catherin	LandRace	17.50 N	77.02 W	226	y	y
CIP 401201	401201	10.18730/37TX	DLP 3261	Yellow Coby		Jamaica	Catherin	LandRace	17.50 N	77.02 W	226	y
CIP 401204	401204	10.18730/37VY	CATIE 9232	Unknown	19860618	Mexico	Campeche	LandRace				y	y
CIP 401205	401205	10.18730/37WZ	CATIE 9257	Unknown	19860618	Mexico	Chiapas	LandRace				y	y
CIP 401206	401206	10.18730/37X*	CATIE 9360	Unknown	19860618	Mexico	Veracruz	LandRace			1396	y	y
CIP 401207	401207	10.18730/37Y~	CTX 14	Santa Sofia	19871025	Mexico		LandRace				y	y
CIP 401208	401208	10.18730/37Z$	CTX 18	Mesquita	19871025	Mexico		LandRace				y
CIP 401209	401209	10.18730/380=	CTX 21	Catemaco	19871025	Mexico		LandRace				y
CIP 401210	401210	10.18730/381U	CTX 23	Cuitzeo	19871025	Mexico		LandRace
CIP 401211	401211	10.18730/3820	CTX 24	Criollo de Veracruz	19871025	Mexico		LandRace
CIP 401212	401212	10.18730/3831	CTX 27	Regional de Tehuantepec	19871025	Mexico		LandRace
CIP 401213	401213	10.18730/3842	CTX 29	Tinto	19871025	Mexico		LandRace				y	y
CIP 401214	401214	10.18730/3853	CTX 31	Criollo Cacahuatan,chis.	19871025	Mexico		LandRace				y	y
CIP 401215	401215	10.18730/3864	CTX 32	Coleccion Tierra Blanca	19871025	Mexico		LandRace
CIP 401216	401216	10.18730/3875	CTX 33	Coleccion Bajo Papaloapan	19871025	Mexico		LandRace
CIP 401217	401217	10.18730/3886	I00079	PI 267946	19910927	Mexico		LandRace
CIP 401218	401218	10.18730/3897	I00088	Morado-de-yucatan	19920420	Mexico		LandRace				y
CIP 401219	401219	10.18730/38A8	I01375	Unknown	19930624	Mexico		LandRace				y	y
CIP 401220	401220	10.18730/38B9	I01408	Catemaco	19910927	Mexico		LandRace
CIP 401221	401221	10.18730/38CA	I01409	Cuitzo	19910927	Mexico		LandRace				y	y
CIP 401222	401222	10.18730/38DB	I01438	Cuitzo Col. 8463	19930624	Mexico		LandRace				y	y
CIP 401223	401223	10.18730/38EC	DLP 4617	Cubano		Nicaragua	Esteli	LandRace	13.21 N	86.26 W	540
CIP 401224	401224	10.18730/38FD	DLP 4675	Camote		Nicaragua	Rio San Juan	LandRace	11.35 N	84.49 W	859
CIP 401225	401225	10.18730/38GE	DLP 4678	Camote		Nicaragua	Rio San Juan	LandRace	11.27 N	84.46 W	200	y	y
CIP 401226	401226	10.18730/38HF	DLP 4684	C-15	19910200	Nicaragua	Managua	ImpVariety	12.18 N	86.22 W	120	y
CIP 401227	401227	10.18730/38JG	DLP 4686	CEMSA-74-228	19910200	Nicaragua	Managua	ImpVariety	12.18 N	86.22 W	120	y
CIP 401228	401228	10.18730/38KH	DLP 4689	Batata Morada		Nicaragua	Managua	LandRace	12.18 N	83.80 W	120
CIP 401230	401230	10.18730/38MJ	RGNIC 1433	Batata Blanca Barcelona	19910314	Nicaragua		LandRace				y	y
CIP 401231	401231	10.18730/38NK	RGNIC 1437	Batata Morada Barcelona	19910314	Nicaragua		LandRace				y	y
CIP 401232	401232	10.18730/38PM	RGNIC 2166	Camote Amarillo Ocotal	19910314	Nicaragua		LandRace
CIP 401233	401233	10.18730/38QN	RGNIC 2362	Camote Esteli	19910314	Nicaragua		LandRace				y	y
CIP 401234	401234	10.18730/38RP	CATIE12448	Unknown	19860618	Panama		LandRace				y	y
CIP 401235	401235	10.18730/38SQ	DLP 3829	unknown	19920905	Panama	Panama	LandRace	8.32 N	79.58 W	202	y	y
CIP 401236	401236	10.18730/38TR	DLP 3830	Blanco	19920905	Panama	Panama	LandRace	8.35 N	79.58 W	202	y
CIP 401237	401237	10.18730/38VS	DLP 3834	unknown	19890803	Panama	Herrera	LandRace	7.48 N	80.43 W	140
CIP 401238	401238	10.18730/38WT	DLP 3836	Batata	19920905	Panama	Herrera	LandRace	7.45 N	80.43 W	345	y	y
CIP 401239	401239	10.18730/38XV	DLP 3837	unknown	19920905	Panama	Herrera	LandRace	7.48 N	80.42 W	338	y	y
CIP 401240	401240	10.18730/38YW	DLP 3838	unknown	19920905	Panama	Herrera	LandRace	7.48 N	80.42 W	338
CIP 401241	401241	10.18730/38ZX	DLP 3839	Blanca	19890803	Panama	Herrera	LandRace	7.48 N	80.42 W	338
CIP 401242	401242	10.18730/390Y	DLP 3840	unknown	19920905	Panama	Herrera	LandRace	7.48 N	80.40 W	338	y
CIP 401243	401243	10.18730/391Z	DLP 3844	Amarilla	19920905	Panama	Los Santos	LandRace	7.56 N	80.24 W	24	y
CIP 401244	401244	10.18730/392*	DLP 3845	Amarilla	19920905	Panama	Veraguas	LandRace	8.18 N	81.05 W	82	y	y
CIP 401245	401245	10.18730/393~	DLP 3849	Amarillo	19920905	Panama	Veraguas	LandRace	8.22 N	81.10 W	99
CIP 401246	401246	10.18730/394$	DLP 3850	unknown	19890803	Panama	Veraguas	LandRace	8.23 N	81.11 W	107
CIP 401247	401247	10.18730/395=	DLP 3851	Amarillo	19920905	Panama	Veraguas	LandRace	8.22 N	81.14 W	250
CIP 401248	401248	10.18730/396U	DLP 3852	Amarillo	19920905	Panama	Veraguas	LandRace	8.22 N	81.14 W	250	y	y
CIP 401249	401249	10.18730/3970	DLP 3854	Morada	19920905	Panama	Veraguas	LandRace	8.28 N	81.15 W	434	y	y
CIP 401250	401250	10.18730/3981	DLP 3855	Blanca	19920905	Panama	Veraguas	LandRace	8.08 N	81.02 W	119
CIP 401251	401251	10.18730/3992	DLP 3856	Morado	19920905	Panama	Veraguas	LandRace	8.06 N	81.02 W	45
CIP 401252	401252	10.18730/39A3	DLP 3857	unknown	19920905	Panama	Veraguas	LandRace	8.04 N	81.16 W	65	y	y
CIP 401253	401253	10.18730/39B4	DLP 3858	Camote	19890803	Panama	Veraguas	LandRace	7.52 N	81.16 W	12	y	y
CIP 401254	401254	10.18730/39C5	DLP 3859	Amarilla	19920905	Panama	Chiriqui	LandRace	6.24 N	82.34 W	37
CIP 401255	401255	10.18730/39D6	DLP 3863	Batatilla	19920905	Panama	Chiriqui	LandRace	8.28 N	82.48 W	239
CIP 401256	401256	10.18730/39E7	DLP 3865	unknown	19920905	Panama	Chiriqui	LandRace	8.28 N	82.50 W	239	y
CIP 401257	401257	10.18730/39F8	DLP 3868	Camote	19920905	Panama	Chiriqui	LandRace	8.12 N	81.38 W	224	y
CIP 401258	401258	10.18730/39G9	DLP 3870	Blanca	19920905	Panama	Veraguas	LandRace	8.10 N	80.26 W	52
CIP 401259	401259	10.18730/39HA	DLP 3871	Roja	19920905	Panama	Veraguas	LandRace	8.10 N	80.26 W	52
CIP 401260	401260	10.18730/39JB	DLP 3872	Camote	19890803	Panama	Herrera	LandRace	8.11 N	80.30 W	25
CIP 401261	401261	10.18730/39KC	DLP 3873	Morada	19920905	Panama	Cocle	LandRace	8.12 N	80.38 W	31
CIP 401262	401262	10.18730/39MD	DLP 3874	unknown	19920905	Panama	Cocle	LandRace	8.18 N	80.31 W	13	y	y
CIP 401263	401263	10.18730/39NE	DLP 3878	Morado		Panama	Panama	LandRace	8.58 N	79.30 W	110	y
CIP 401264	401264	10.18730/39PF	DLP 3879	Batata Roja		Panama	Panama	LandRace	9.05 N	78.55 W		y
CIP 401265	401265	10.18730/39QG	DLP 3880	Morada		Panama	Darien	LandRace	8.55 N	78.35 W	34	y	y
CIP 401266	401266	10.18730/39RH	DLP 3881	unknown		Panama	Darien	LandRace	8.50 N	78.33 W	5	y
CIP 401267	401267	10.18730/39SJ	DLP 3882	Blanco		Panama	Darien	LandRace	8.48 N	78.30 W	23	y	y
CIP 401268	401268	10.18730/39TK	DLP 3884	Blanca		Panama	Darien	LandRace	8.47 N	78.30 W	23
CIP 401269	401269	10.18730/39VM	DLP 3885	unknown		Panama	Darien	LandRace	8.45 N	78.28 W	5
CIP 401270	401270	10.18730/39WN	DLP 3887	unknown		Panama	Darien	LandRace	8.43 N	78.26 W	5
CIP 401271	401271	10.18730/39XP	DLP 3890	unknown		Panama	Darien	LandRace	8.09 N	78.02 W	53
CIP 401272	401272	10.18730/39YQ	DLP 3891	Colorado		Panama	Darien	LandRace	8.08 N	78.02 W	16	y
CIP 401273	401273	10.18730/39ZR	DLP 3892	Colorado		Panama	Darien	LandRace	8.07 N	78.01 W	10
CIP 401274	401274	10.18730/3A0S	DLP 3894	unknown		Panama	Panama	LandRace	9.10 N	78.50 W	215	y	y
CIP 401275	401275	10.18730/3A1T	DLP 3895	Amarillo		Panama	Panama	LandRace	9.09 N	78.55 W	75
CIP 401276	401276	10.18730/3A2V	DLP 3896	unknown		Panama	Panama	LandRace	9.08 N	78.54 W	80
CIP 401277	401277	10.18730/3A3W	DLP 3898	Rojo-kinit		Panama	Panama	LandRace	9.08 N	79.02 W	23
CIP 401278	401278	10.18730/3A4X	DLP 3899	unknown		Panama	Panama	LandRace	8.44 N	78.52 W	8
CIP 401279	401279	10.18730/3A5Y	DLP 3902	unknown		Panama	Panama	LandRace	8.36 N	79.53 W	109
CIP 401280	401280	10.18730/3A6Z	DLP 3903	unknown		Panama	Panama	LandRace	8.54 N	79.44 W	141	y	y
CIP 401281	401281	10.18730/3A7*	CATIE 8415	Unknown	19860618	Puerto Rico		LandRace
CIP 401284	401284	10.18730/3A8~	I00077	PI 208886	19910927	Puerto Rico		LandRace				y
CIP 401285	401285	10.18730/3A9$	I01192	Ninety-nine	19910927	Puerto Rico		ImpVariety
CIP 401286	401286	10.18730/3AA=	I01194	Hes 50	19910927	Puerto Rico		LandRace				y
CIP 401287	401287	10.18730/3ABU	I01196	Hes 33	19910927	Puerto Rico		LandRace				y
CIP 401288	401288	10.18730/3AC0	I01198	Hes 35	19910927	Puerto Rico		LandRace
CIP 401289	401289	10.18730/3AD1	I01199	Puerto Rico Local Cv. Ii	19910927	Puerto Rico		LandRace				y	y
CIP 401290	401290	10.18730/3AE2	I01346	Viola	19910927	Puerto Rico		ImpVariety
CIP 401292	401292	10.18730/3AF3	I01351	Limonette	19930515	Puerto Rico		ImpVariety
CIP 401293	401293	10.18730/3AG4	SPV 70	Margarita	19860720	Puerto Rico	yaguez	ImpVariety
CIP 401294	401294	10.18730/3AH5	SPV 71	Tapato	19860720	Puerto Rico	yaguez	ImpVariety				y
CIP 401300	401300	10.18730/3AJ6	DLP 4174	Yety-i	19900508	Paraguay	Alto Parana	LandRace	25.10 S	55.22 W	191	y	y
CIP 401301	401301	10.18730/3AK7	DLP 4176	Yety (Abayybo)	19900508	Paraguay	Alto Parana	LandRace	25.10 S	55.22 W	191
CIP 401302	401302	10.18730/3AM8	DLP 4178	Roxa	19900508	Paraguay	Alto Parana	LandRace	25.30 S	55.30 W	255	y	y
CIP 401303	401303	10.18730/3AN9	DLP 4181	Batata Bobora	19900508	Paraguay	Alto Parana	LandRace	25.30 S	55.30 W	255
CIP 401304	401304	10.18730/3APA	DLP 4188	Yety Pyta	19900508	Paraguay	Alto Parana	LandRace	25.32 S	55.30 W	260
CIP 401305	401305	10.18730/3AQB	DLP 4234	unknown	19900508	Paraguay	Pdte Hayes	LandRace	24.03 S	59.08 W	117	y
CIP 401306	401306	10.18730/3ARC	DLP 4235	Yety Pyto-i	19900508	Paraguay	Pdte Hayes	LandRace	24.03 S	59.08 W	140
CIP 401307	401307	10.18730/3ASD	DLP 4242	Boliviana	19900508	Paraguay	Boqueron	LandRace	22.50 S	59.50 W	130	y	y
CIP 401308	401308	10.18730/3ATE	DLP 5206	Yety Losa		Paraguay	Misiones	LandRace	26.49 S	56.54 W	150
CIP 401309	401309	10.18730/3AVF	DLP 5208	Caramelo o Carao		Paraguay	Misiones	LandRace	26.49 S	56.54 W	150	y	y
CIP 401310	401310	10.18730/3AWG	DLP 5209	Yety Pyta		Paraguay	Misiones	LandRace	26.49 S	56.54 W	150	y	y
CIP 401311	401311	10.18730/3AXH	DLP 5210	Yety Say Yu		Paraguay	Misiones	LandRace	26.49 S	54.54 W	150
CIP 401312	401312	10.18730/3AYJ	DLP 5211	Yety Senorita		Paraguay	Misiones	LandRace	26.49 S	56.57 W	121	y	y
CIP 401313	401313	10.18730/3AZK	DLP 5214	Unknown		Paraguay	Neembucu	LandRace	26.27 S	58.11 W	66
CIP 401314	401314	10.18730/3B0M	DLP 5217	Yety Puta		Paraguay	Neembucu	LandRace	26.40 S	58.14 W	50
CIP 401315	401315	10.18730/3B1N	DLP 5220	Yety Mandioc		Paraguay	Neembucu	LandRace	27.10 S	58.28 W	50	y
CIP 401316	401316	10.18730/3B2P	DLP 5221	Yety Panambi		Paraguay	Neembucu	LandRace	27.00 S	58.22 W	40	y	y
CIP 401317	401317	10.18730/3B3Q	DLP 5225	Unknown		Paraguay	Neembucu	LandRace	27.10 S	57.51 W	59
CIP 401318	401318	10.18730/3B4R	DLP 5226	Cubano		Paraguay	Neembucu	LandRace	27.00 S	58.22 W	40
CIP 401319	401319	10.18730/3B5S	DLP 5229	Yety Andai		Paraguay	Central	LandRace	25.24 S	57.31 W	130	y
CIP 401320	401320	10.18730/3B6T	DLP 5240	Unknown		Paraguay	Canendiyu	LandRace	24.27 S	55.37 W	180	y
CIP 401321	401321	10.18730/3B7V	DLP 5241	Yety Aleman		Paraguay	Canendiyu	LandRace	24.27 S	55.37 W	180	y	y
CIP 401322	401322	10.18730/3B8W	DLP 5242	Yety Morada		Paraguay	Canendiyu	LandRace	24.27 S	55.37 W	180
CIP 401323	401323	10.18730/3B9X	DLP 5243	Siete Puntas		Paraguay	Canendiyu	LandRace	24.27 S	55.37 W	180
CIP 401324	401324	10.18730/3BAY	DLP 5244	Yety Morati		Paraguay	Canendiyu	LandRace	24.27 S	55.37 W	180
CIP 401325	401325	10.18730/3BBZ	DLP 5245	Yety Azucena		Paraguay	Canendiyu	LandRace	24.27 S	55.37 W	180
CIP 401326	401326	10.18730/3BC*	DLP 5246	Yety Araza		Paraguay	Canendiyu	LandRace	24.27 S	55.37 W	180	y
CIP 401327	401327	10.18730/3BD~	DLP 5247	Yety Cururu		Paraguay	Canendiyu	LandRace	24.27 S	55.37 W	220
CIP 401328	401328	10.18730/3BE$	DLP 5248	Yety Mbocaya		Paraguay	Canendiyu	LandRace	24.27 S	55.37 W	220	y	y
CIP 401329	401329	10.18730/3BF=	DLP 5249	Yety Jnovy		Paraguay	Canendiyu	LandRace	24.27 S	55.37 W	230
CIP 401330	401330	10.18730/3BGU	DLP 5250	Yety Paraguay		Paraguay	Canendiyu	LandRace	24.27 S	55.37 W	130	y	y
CIP 401331	401331	10.18730/3BH0	DLP 5252	Yety Guarani		Paraguay	Canendiyu	LandRace	24.27 S	55.37 W	140	y	y
CIP 401332	401332	10.18730/3BJ1	DLP 5253	Yety Puta		Paraguay	Canendiyu	LandRace	24.05 S	55.31 W	140	y	y
CIP 401333	401333	10.18730/3BK2	DLP 5254	Yety Azucena		Paraguay	Canendiyu	LandRace	24.05 S	55.31 W	140
CIP 401334	401334	10.18730/3BM3	DLP 5255	Yety Araza		Paraguay	Canendiyu	LandRace	24.05 S	55.31 W	140	y	y
CIP 401335	401335	10.18730/3BN4	DLP 5256	Yety Mbocaya		Paraguay	Canendiyu	LandRace	24.05 S	55.31 W	140	y	y
CIP 401336	401336	10.18730/3BP5	DLP 5257	Yety Aleman		Paraguay	Canendiyu	LandRace	24.05 S	55.31 W	140
CIP 401337	401337	10.18730/3BQ6	DLP 5258	Yety Say-yu		Paraguay	Canendiyu	LandRace	23.55 S	55.28 W	220
CIP 401338	401338	10.18730/3BR7	DLP 5260	Yety Aleman		Paraguay	Canendiyu	LandRace	23.55 S	55.28 W	220
CIP 401339	401339	10.18730/3BS8	DLP 5261	Yety Andai		Paraguay	Canendiyu	LandRace	23.55 S	55.28 W	220	y	y
CIP 401341	401341	10.18730/3BVA	DLP 5263	Yety Moroti		Paraguay	Canendiyu	LandRace	23.55 S	55.28 W	220	y
CIP 401342	401342	10.18730/3BWB	DLP 5266	Batata Branca		Paraguay	Canendiyu	LandRace	24.00 S	55.02 W	239
CIP 401343	401343	10.18730/3BXC	DLP 5273	Batata Amarilla		Paraguay	Canendiyu	LandRace	24.13 S	54.50 W	357	y	y
CIP 401344	401344	10.18730/3BYD	DLP 5274	Batata Branca		Paraguay	Canendiyu	LandRace	24.13 S	54.50 W	357
CIP 401345	401345	10.18730/3BZE	DLP 5276	Unknown		Paraguay	Alto Parana	LandRace	24.51 S	54.38 W	310	y	y
CIP 401346	401346	10.18730/3C0F	DLP 5277	Batata Douce		Paraguay	Alto Parana	LandRace	25.30 S	54.41 W	260	y
CIP 401369	401369	10.18730/3C1G	VILARO 7	Enano	19930401	Uruguay	nelones	BredLine	34.37 S	55.12 W	27	y
CIP 401370	401370	10.18730/3C2H	VILARO 9	Chileno	19930401	Uruguay	lto	BredLine	31.31 S	57.45 W	35	y
CIP 401371	401371	10.18730/3C3J	SVG 3	Black Vine	19930920	Vatican City State		LandRace				y	y
CIP 401372	401372	10.18730/3C4K	SVG 8	Rasta	19930920	Vatican City State		LandRace				y	y
CIP 401374	401374	10.18730/3C5M	SVG 19	Break Fall	19930920	Vatican City State		LandRace				y	y
CIP 401375	401375	10.18730/3C6N	SVG 27	Six Weeks	19930920	Vatican City State		LandRace				y	y
CIP 401376	401376	10.18730/3C7P	SVG 32	Red Sauce	19930920	Vatican City State		LandRace				y	y
CIP 401377	401377	10.18730/3C8Q	SVG INT12	Mandela White Vine	19930920	Vatican City State		LandRace				y
CIP 401378	401378	10.18730/3C9R	DLP 724	Rosada		Venezuela	Cojedes	LandRace	9.40 N	68.40 W	264	y	y
CIP 401379	401379	10.18730/3CAS	DLP 732	unknown		Venezuela	Cojedes	LandRace	9.40 N	68.40 W	169	y	y
CIP 401380	401380	10.18730/3CBT	DLP 765	unknown		Venezuela	Lara	LandRace	9.50 N	69.10 W	900
CIP 401381	401381	10.18730/3CCV	DLP 790	unknown		Venezuela	Lara	LandRace	9.45 N	69.40 W	267	y	y
CIP 401382	401382	10.18730/3CDW	DLP 791	unknown		Venezuela	Lara	LandRace	9.45 N	69.40 W	267	y	y
CIP 401383	401383	10.18730/3CEX	DLP 792	unknown		Venezuela	Lara	LandRace	9.45 N	69.40 W	267	y
CIP 401384	401384	10.18730/3CFY	DLP 794	Amarilla		Venezuela	Lara	LandRace	9.50 N	69.50 W	413
CIP 401385	401385	10.18730/3CGZ	DLP 795	Morado		Venezuela	Lara	LandRace	9.50 N	69.50 W	413	y	y
CIP 401386	401386	10.18730/3CH*	DLP 796	Criolla		Venezuela	Lara	LandRace	9.50 N	69.50 W	413
CIP 401390	401390	10.18730/3CJ~	DLP 807	Amarilla		Venezuela	Trujillo	LandRace	9.10 N	70.00 W	1723	y
CIP 401391	401391	10.18730/3CK$	DLP 808	Gonzalique		Venezuela	Trujillo	LandRace	9.10 N	70.10 W	1723	y	y
CIP 401392	401392	10.18730/3CM=	DLP 809	Carachera		Venezuela	Trujillo	LandRace	9.10 N	70.10 W	1723
CIP 401393	401393	10.18730/3CNU	DLP 810	Goyera		Venezuela	Trujillo	LandRace	9.10 N	70.10 W	1723
CIP 401394	401394	10.18730/3CP0	DLP 811	Barbechera		Venezuela	Trujillo	LandRace	9.10 N	70.10 W	1723	y	y
CIP 401395	401395	10.18730/3CQ1	DLP 820	unknown		Venezuela	Merida	LandRace	8.10 N	71.15 W	2096
CIP 401396	401396	10.18730/3CR2	DLP 822	unknown		Venezuela	Merida	LandRace	8.40 N	71.45 W	2200	y	y
CIP 401397	401397	10.18730/3CS3	DLP 823	unknown		Venezuela	Merida	LandRace	8.40 N	71.45 W	2200
CIP 401399	401399	10.18730/3CT4	DLP 826	unknown		Venezuela	Merida	LandRace	8.20 N	71.50 W	738
CIP 401400	401400	10.18730/3CV5	DLP 827	unknown		Venezuela	Merida	LandRace	8.20 N	71.50 W	738	y	y
CIP 401401	401401	10.18730/3CW6	DLP 829	unknown		Venezuela	Merida	LandRace	8.30 N	71.25 W	2000	y	y
CIP 401403	401403	10.18730/3CX7	DLP 837	Morado		Venezuela	Merida	LandRace	8.35 N	71.05 W	2740	y	y
CIP 401404	401404	10.18730/3CY8	DLP 838	unknown		Venezuela	Merida	LandRace	8.35 N	71.05 W	2740
CIP 401428	401428	10.18730/3CZ9	DLP 2827	unknown		Venezuela	Miranda	LandRace	10.25 N	66.20 W	89	y	y
CIP 401429	401429	10.18730/3D0A	DLP 2834	Morada		Venezuela	Miranda	LandRace	10.20 N	66.16 W	6	y	y
CIP 401430	401430	10.18730/3D1B	DLP 2840	Morada		Venezuela	Miranda	LandRace	10.06 N	66.36 W	201	y	y
CIP 401431	401431	10.18730/3D2C	DLP 2850	Batata Morada		Venezuela	Guarico	LandRace	9.24 N	67.34 W	416	y	y
CIP 401432	401432	10.18730/3D3D	DLP 2867	Batata Rosa		Venezuela	Sucre	LandRace	10.25 N	64.10 W	7	y
CIP 401433	401433	10.18730/3D4E	DLP 2868	Cerro Colorado		Venezuela	Sucre	LandRace	10.24 N	64.08 W	7	y	y
CIP 401434	401434	10.18730/3D5F	DLP 2869	Chaco Morado		Venezuela	Sucre	LandRace	10.20 N	63.55 W	293	y	y
CIP 401435	401435	10.18730/3D6G	DLP 2871	unknown		Venezuela	Sucre	LandRace	10.18 N	63.52 W	29	y	y
CIP 401436	401436	10.18730/3D7H	DLP 2872	Blanco		Venezuela	Sucre	LandRace	10.16 N	63.50 W	417	y	y
CIP 401437	401437	10.18730/3D8J	DLP 2873	Chaco Blanco		Venezuela	Sucre	LandRace	10.15 N	63.48 W	56	y	y
CIP 401438	401438	10.18730/3D9K	DLP 2874	Chaco Morado		Venezuela	Sucre	LandRace	10.14 N	63.48 W	520	y	y
CIP 401439	401439	10.18730/3DAM	DLP 2875	Chaco Rosado		Venezuela	Sucre	LandRace	10.14 N	63.48 W	520	y	y
CIP 401440	401440	10.18730/3DBN	DLP 2876	Blanca		Venezuela	Sucre	LandRace	10.12 N	63.46 W	490	y	y
CIP 401441	401441	10.18730/3DCP	DLP 2877	Morada		Venezuela	Sucre	LandRace	10.12 N	63.46 W	490	y
CIP 401442	401442	10.18730/3DDQ	DLP 2878	Batata Morada		Venezuela	Sucre	LandRace	10.10 N	63.46 W	500	y	y
CIP 401443	401443	10.18730/3DER	DLP 2880	Morada		Venezuela	Sucre	LandRace	10.07 N	63.44 W	51	y	y
CIP 401444	401444	10.18730/3DFS	DLP 2881	Chaco Rosado		Venezuela	Monagas	LandRace	10.06 N	63.44 W	940	y	y
CIP 401445	401445	10.18730/3DGT	DLP 2882	Blanca		Venezuela	Monagas	LandRace	10.05 N	63.40 W	188	y	y
CIP 401446	401446	10.18730/3DHV	DLP 2883	Blanca		Venezuela	Monagas	LandRace	10.05 N	63.40 W	188	y	y
CIP 401447	401447	10.18730/3DJW	DLP 2884	unknown		Venezuela	Monagas	LandRace	10.05 N	63.40 W	188	y	y
CIP 401448	401448	10.18730/3DKX	DLP 2888	Morada		Venezuela	Monagas	LandRace	9.50 N	63.18 W	600	y	y
CIP 401449	401449	10.18730/3DMY	DLP 2889	unknown		Venezuela	Monagas	LandRace	9.50 N	63.10 W	100
CIP 401450	401450	10.18730/3DNZ	DLP 2890	unknown		Venezuela	Monagas	LandRace	9.50 N	63.10 W	100
CIP 401451	401451	10.18730/3DP*	DLP 2891	Blanco		Venezuela	Monagas	LandRace	9.52 N	63.12 W	123
CIP 401452	401452	10.18730/3DQ~	DLP 2892	unknown		Venezuela	Monagas	LandRace	9.54 N	63.38 W	620	y	y
CIP 401453	401453	10.18730/3DR$	DLP 2896	Morado		Venezuela	Monagas	LandRace	10.02 N	63.38 W	1199	y	y
CIP 401454	401454	10.18730/3DS=	DLP 2897	Blanco		Venezuela	Monagas	LandRace	10.04 N	63.38 W	1195
CIP 401455	401455	10.18730/3DTU	DLP 2898	Blanco		Venezuela	Monagas	LandRace	10.10 N	63.30 W	1195	y	y
CIP 401457	401457	10.18730/3DV0	DLP 2901	unknown		Venezuela	Nueva Esparta	LandRace	11.08 N	63.52 W	354	y	y
CIP 401458	401458	10.18730/3DW1	DLP 2902	unknown		Venezuela	Nueva Esparta	LandRace	11.08 N	63.52 W	354	y
CIP 401459	401459	10.18730/3DX2	DLP 2905	Blanco		Venezuela	Caracas	LandRace	10.28 N	66.48 W	1212	y	y
CIP 401460	401460	10.18730/3DY3	I01389	Unknown	19930515	Venezuela		LandRace
CIP 401461	401461	10.18730/3DZ4	I01390	Unknown	19910927	Venezuela		LandRace				y	y
CIP 401462	401462	10.18730/3E05	UNT 2	Morada Inta o Papa Cabra	19880512	Argentina	Tucumam	ImpVariety	26.50 S	65.00 W	459
CIP 401463	401463	10.18730/3E16	A 1		19891000	Mexico		LandRace				y	y
CIP 401464	401464	10.18730/3E27	DLP 806	Patatilla		Venezuela	Trujillo	LandRace	9.10 N	70.10 W	1723
CIP 401465	401465	10.18730/3E38	PI 439749	2056	19880303	Mexico		LandRace				y	y
CIP 401466	401466	10.18730/P6BR~	CC89.213	CC89.213	20030000	Peru		BredLine				y
CIP 401467	401467	10.18730/P64PX	PER Hawaiano	Hawaiano	19990000	Peru		LandRace
CIP 401468	401468	10.18730/3E49	A 18		19891000	Mexico		LandRace				y
CIP 401469	401469	10.18730/3E5A	A 30		19891000	Mexico		LandRace				y	y
CIP 401470	401470	10.18730/3E6B	A 37		19891000	Mexico		LandRace				y	y
CIP 401471	401471	10.18730/3E7C	A 48		19891000	Mexico		LandRace				y	y
CIP 401472	401472	10.18730/3E8D	A 54		19891000	Mexico		LandRace				y	y
CIP 401473	401473	10.18730/3E9E	A 67		19891000	Mexico		LandRace				y	y
CIP 401474	401474	10.18730/3EAF	A 77		19891000	Mexico		LandRace
CIP 401475	401475	10.18730/3EBG	A 85		19891000	Mexico		LandRace
CIP 401476	401476	10.18730/3ECH	A 91		19891000	Mexico		LandRace				y	y
CIP 401477	401477	10.18730/3EDJ	A 94		19891000	Mexico		LandRace
CIP 401478	401478	10.18730/3EEK	A 98		19891000	Mexico		LandRace
CIP 401479	401479	10.18730/3EFM	A 105		19891000	Mexico		LandRace
CIP 401480	401480	10.18730/3EGN	A 113		19891000	Mexico		LandRace
CIP 401481	401481	10.18730/3EHP	A 122		19891000	Mexico		LandRace
CIP 401482	401482	10.18730/3EJQ	A 126		19891000	Mexico		LandRace
CIP 401483	401483	10.18730/3EKR	A 128		19891000	Mexico		LandRace
CIP 401484	401484	10.18730/3EMS	A 140		19891000	Mexico		LandRace
CIP 401485	401485	10.18730/3ENT	A 142		19891000	Mexico		LandRace
CIP 401486	401486	10.18730/3EPV	A 144		19891000	Mexico		LandRace
CIP 401487	401487	10.18730/3EQW	A 149		19891000	Mexico		LandRace
CIP 401488	401488	10.18730/3ERX	A 151		19891000	Mexico		LandRace
CIP 401489	401489	10.18730/3ESY	A 160		19891000	Mexico		LandRace
CIP 401490	401490	10.18730/3ETZ	A 167		19891000	Mexico		LandRace
CIP 401491	401491	10.18730/3EV*	A 172		19891000	Mexico		LandRace
CIP 401492	401492	10.18730/3EW~	CESDA VANDA	Vanda I	19860812	Dominican Republic		LandRace				y	y
CIP 401493	401493	10.18730/3EX$	DLP 426		19850604	Ecuador	Loja	Landrace	3.50 S	79.50 W	1170	y
CIP 401494	401494	10.18730/3EY=	DLP 600	Unknown	19850915	Ecuador	Pichincha	LandRace	0.10 S	79.30 W	300	y	y
CIP 401495	401495	10.18730/3EZU	DLP 607	Silvestre	19850915	Ecuador	Manabi	Landrace	0.10 S	80.30 W	41	y
CIP 401496	401496	10.18730/3F00	DLP 611	Silvestre ? (Ecu 15	19850915	Ecuador	Manabi	Landrace	0.14 S	80.20 W	58
CIP 401497	401497	10.18730/3F11	DLP 799	Unknown		Venezuela	Trujillo	LandRace	9.15 N	70.20 W	2427	y
CIP 401498	401498	10.18730/3F22	DLP 800	Unknown		Venezuela	Trujillo	LandRace	9.15 N	70.20 W	2427	y	y
CIP 401499	401499	10.18730/3F33	DLP 824	Unknown		Venezuela	Merida	LandRace	8.20 N	71.30 W	738	y	y
CIP 401500	401500	10.18730/3F44	DLP 832	Unknown		Venezuela	Merida	LandRace	8.35 N	71.10 W	1591	y	y
CIP 401501	401501	10.18730/3F55	DLP 842	Unknown		Venezuela	Merida	LandRace	8.50 N	70.30 W	2000
CIP 401502	401502	10.18730/3F66	DLP 848	Unknown		Venezuela		LandRace
CIP 401503	401503	10.18730/3F77	DLP 849	Unknown		Venezuela		LandRace				y	y
CIP 401504	401504	10.18730/3F88	DLP 850	Santa Catalina		Venezuela		LandRace				y	y
CIP 401505	401505	10.18730/3F99	DLP 852	Yaracuy		Venezuela		LandRace
CIP 401506	401506	10.18730/3FAA	DLP 853	Unknown		Venezuela		LandRace				y	y
CIP 401507	401507	10.18730/3FBB	DLP 854	Unknown		Venezuela		LandRace				y	y
CIP 401508	401508	10.18730/3FCC	DLP 855	Unknown		Venezuela		LandRace
CIP 401510	401510	10.18730/3FDD	DLP 857	Unknown		Venezuela		LandRace
CIP 401511	401511	10.18730/3FEE	DLP 858	Unknown		Venezuela		LandRace				y	y
CIP 401512	401512	10.18730/3FFF	DLP 859	Unknown		Venezuela		LandRace
CIP 401513	401513	10.18730/3FGG	DLP 860	Unknown		Venezuela		LandRace				y	y
CIP 401514	401514	10.18730/3FHH	DLP 861	Unknown		Venezuela		LandRace				y	y
CIP 401515	401515	10.18730/3FJJ	DLP 862	Unknown		Venezuela		LandRace				y	y
CIP 401516	401516	10.18730/3FKK	DLP 863	Unknown		Venezuela		LandRace
CIP 401517	401517	10.18730/3FMM	DLP 864	Unknown		Venezuela		LandRace				y
CIP 401518	401518	10.18730/3FNN	DLP 865	Unknown		Venezuela		LandRace				y
CIP 401519	401519	10.18730/3FPP	DLP 866	Unknown		Venezuela		LandRace				y	y
CIP 401520	401520	10.18730/3FQQ	DLP 867	Isleno		Venezuela		LandRace
CIP 401521	401521	10.18730/3FRR	DLP 868	Catemaco		Venezuela		LandRace
CIP 401522	401522	10.18730/3FSS	DLP 869	Unknown		Venezuela		LandRace				y	y
CIP 401523	401523	10.18730/3FTT	DLP 879	Unknown		Venezuela	Merida	LandRace	8.20 N	71.50 W	738	y
CIP 401524	401524	10.18730/3FVV	DLP 1153	Unknown		Ecuador	Napo	LandRace	0.10 S	76.55 W	298
CIP 401525	401525	10.18730/3FWW	DLP 1157	Unknown		Ecuador	Napo	LandRace	0.10 N	76.55 W	314	y
CIP 401526	401526	10.18730/3FXX	DLP 1180	Unknown		Ecuador	Napo	LandRace	1.10 S	77.55 W	771
CIP 401527	401527	10.18730/3FYY	DLP 1186	Unknown		Ecuador	Napo	LandRace	0.50 S	77.50 W	474	y	y
CIP 401528	401528	10.18730/3FZZ	DLP 1192	Unknown		Ecuador	Napo	LandRace	1.20 S	77.52 W	400	y
CIP 401530	401530	10.18730/3G0*	DLP 1206	Unknown		Ecuador	Pastaza	LandRace	1.28 S	78.08 W	919	y	y
CIP 401531	401531	10.18730/3G1~	DLP 1210	Silvestre		Ecuador	Tungurahua	Landrace	1.28 S	78.08 W	1558	y	y
CIP 401533	401533	10.18730/3G2$	DLP 1219	Unknown		Ecuador	Chimborazo	LandRace	2.20 S	79.10 W	3369	y
CIP 401534	401534	10.18730/3G3=	DLP 1222	Unknown		Ecuador	Guayas	LandRace	2.30 S	79.50 W	482	y	y
CIP 401535	401535	10.18730/3G4U	DLP 1237	Maleza ?		Ecuador	Zamora	Landrace	4.05 S	78.55 W	941
CIP 401536	401536	10.18730/3G50	DLP 1241	Unknown		Ecuador	Zamora	LandRace	3.40 S	78.40 W	945	y	y
CIP 401537	401537	10.18730/3G61	DLP 1265	Maleza ?		Ecuador	El Oro	Landrace	3.35 S	79.50 W	410
CIP 401538	401538	10.18730/3G72	DLP 1340	Unknown		Bolivia	La Paz	LandRace	16.25 S	67.30 W	1695
CIP 401539	401539	10.18730/3G83	DLP 1389	Unknown		Ecuador	Ibabura	LandRace	0.35 N	78.05 W	2405	y
CIP 401541	401541	10.18730/3G94	DLP 1561	Colorado		Dominican Republic	ravia	LandRace	18.40 N	70.45 W	952	y	y
CIP 401542	401542	10.18730/3GA5	DLP 1565	La Paradita		Dominican Republic	ravia	LandRace	18.50 N	70.45 W	1341	y	y
CIP 401543	401543	10.18730/3GB6	DLP 1590	Mocana - Cino		Dominican Republic	nsenor Nouel	LandRace	19.10 N	70.30 W	184	y	y
CIP 401544	401544	10.18730/3GC7	DLP 1660	Unknown		Bolivia	Nor Yungas	LandRace	15.32 S	67.26 W	1100
CIP 401545	401545	10.18730/3GD8	DLP 1662	Blanco Larco		Bolivia	Nor Yungas	LandRace	15.28 S	67.25 W	1000	y
CIP 401546	401546	10.18730/3GE9	DLP 1685	Unknown		Colombia	Huila	LandRace	2.46 N	75.28 W	1340	y	y
CIP 401547	401547	10.18730/3GFA	DLP 1693	Unknown		Colombia	Huila	LandRace	2.25 N	75.50 W	1034	y	y
CIP 401548	401548	10.18730/3GGB	DLP 1721	Unknown		Colombia	Narino	LandRace	1.15 N	77.18 W	2017	y	y
CIP 401549	401549	10.18730/3GHC	DLP 1730	Batatilla		Colombia	Narino	LandRace	1.32 N	77.14 W	2033
CIP 401550	401550	10.18730/3GJD	DLP 1752	Unknown		Colombia	Narino	LandRace	1.38 N	77.08 W	1340	y	y
CIP 401551	401551	10.18730/3GKE	DLP 1806	Unknown		Colombia	Cauca	LandRace	2.22 N	77.40 W	1734
CIP 401552	401552	10.18730/3GMF	DLP 1825	Unknown		Colombia	Valle De Cauca	LandRace	3.22 N	76.28 W	1840	y
CIP 401553	401553	10.18730/3GNG	DLP 1885	Morada		Colombia	Tolima	LandRace	4.27 N	75.18 W	1665	y	y
CIP 401554	401554	10.18730/3GPH	DLP 1896	Unknown		Colombia	Cundinamarca	LandRace	4.56 N	74.34 W	1118	y
CIP 401555	401555	10.18730/3GQJ	DLP 1897	Unknown		Colombia	Cundinamarca	LandRace	4.54 N	74.24 W	1121	y	y
CIP 401556	401556	10.18730/3GRK	DLP 1899	Unknown		Colombia	Cundinamarca	LandRace	4.54 N	74.22 W	1550	y	y
CIP 401557	401557	10.18730/3GSM	DLP 2044	Unknown		Colombia	Magdalena	LandRace	10.54 N	74.04 W	1313	y	y
CIP 401558	401558	10.18730/3GTN	DLP 2046	Unknown		Colombia	Magdalena	LandRace	10.56 N	74.25 W	1
CIP 401559	401559	10.18730/3GVP	DLP 2149	Unknown		Colombia	Norte Santander	LandRace	8.05 N	73.10 W	1210	y	y
CIP 401560	401560	10.18730/3GWQ	DLP 2900	Unknown		Venezuela	Nueva Esparta	LandRace	11.06 N	63.50 W	29	y	y
CIP 401561	401561	10.18730/P6BAK	DLP 3333	Cuello Rosado Pipo	19900724	Argentina		LandRace				y
CIP 401562	401562	10.18730/P7A13	DLP 3335	Jewel	19900724	Argentina		ImpVariety				y
CIP 401563	401563	10.18730/P6XG9	DLP 3343	F12-14	19900724	Argentina		BredLine				y
CIP 401564	401564	10.18730/3GXR	DLP 4020	Silvestre Bat x spp?	19920401	Argentina	Corrientes	Landrace	27.50 S	57.35 W	75
CIP 401565	401565	10.18730/3GYS	DLP 4021		19920401	Argentina	Corrientes	Landrace	27.50 S	57.35 W	75	y	y
CIP 401566	401566	10.18730/3GZT	DLP 4022	Silvestre Bat x spp?	19920401	Argentina	Corrientes	Landrace	27.50 S	57.35 W	75	y	y
CIP 401567	401567	10.18730/3H0V	DLP 4077		19920401	Argentina	Misiones	LandRace	26.15 S	54.40 W	817	y	y
CIP 401568	401568	10.18730/3H1W	DLP 4164	Yety Pyta	19900508	Paraguay	Alto Parana	Landrace	24.26 S	54.50 W	248	y	y
CIP 401569	401569	10.18730/P6DWV	DOM 3-C-N	3-C-N	19910516	Dominican Republic		BredLine				y
CIP 401575	401575	10.18730/P683V	DPW 2856		19911230	Brazil		Landrace
CIP 401576	401576	10.18730/P66YV	ECU 62	Ecu 62	19940000	Ecuador		LandRace				y
CIP 401577	401577	10.18730/3H2X	GTM 342a	Camote Tinto	19890225	Guatemala	Jutiapa	LandRace	14.17 N	89.53 W	900
CIP 401578	401578	10.18730/3H3Y	GTM 342b	Camote Tinto	19890225	Guatemala	Jutiapa	LandRace	14.17 N	89.53 W	900	y
CIP 401579	401579	10.18730/3H4Z	GTM 372	Unknown	19890225	Guatemala	Peten	LandRace	16.48 N	89.58 W	207
CIP 401580	401580	10.18730/3H5*	GTM 384b	Camote Moral	19890225	Guatemala	Peten	LandRace	16.32 N	90.18 W	496
CIP 401581	401581	10.18730/3H6~	GTM 387	Unknown	19890225	Guatemala	Peten	LandRace	16.32 N	90.18 W	496
CIP 401582	401582	10.18730/3H7$	GTM 432	Unknown	19890225	Guatemala	Izabal	LandRace	15.32 N	88.43 W	15
CIP 401583	401583	10.18730/3H8=	GTM 503b	Camote Amarillo	19890225	Guatemala	Chimaltenango	LandRace	14.37 N	90.50 W	1982
CIP 401584	401584	10.18730/3H9U	GTM 618c	Unknown	19890225	Guatemala	Peten	LandRace	16.20 N	90.12 W	126
CIP 401585	401585	10.18730/3HA0	GTM 633	Unknown	19890225	Guatemala	Izabal	LandRace	15.28 N	88.49 W
CIP 401586	401586	10.18730/3HB1	GTM 1109	Unknown	19890225	Guatemala	Quiche	LandRace	14.59 N	90.59 W	1914
CIP 401587	401587	10.18730/3HC2	GTM 1122	Unknown	19890225	Guatemala	Quiche	LandRace	15.18 N	91.04 W	1914	y	y
CIP 402598	402598	10.18730/P7GNY	INIVIT 58a	Matojo Real 1	19940201	Cuba		Landrace				y	y
CIP 402599	402599	10.18730/P7GPZ	INIVIT 58b	Matojo Real 2	19940201	Cuba		Landrace
CIP 402600	402600	10.18730/P7GQ*	INIVIT 69		19940201	Cuba		Landrace				y	y
CIP 402601	402601	10.18730/P672Z	INIVIT 107		19930330	Cuba		Landrace				y
CIP 402602	402602	10.18730/P673*	INIVIT 109		19930330	Cuba		Landrace
CIP 402603	402603	10.18730/P684W	INIVIT 124		19910411	Cuba		Landrace				y	y
CIP 402604	402604	10.18730/P6791	INIVIT 126		19920316	Cuba		Landrace				y	y
CIP 402605	402605	10.18730/P685X	INIVIT 141		19910411	Cuba		Landrace
CIP 402606	402606	10.18730/P686Y	INIVIT 142		19910411	Cuba		Landrace				y	y
CIP 402608	402608	10.18730/P687Z	INIVIT 164		19910411	Cuba		Landrace
CIP 402609	402609	10.18730/P688*	INIVIT 167		19910411	Cuba		Landrace				y	y
CIP 402610	402610	10.18730/P689~	INIVIT 171		19910411	Cuba		Landrace				y	y
CIP 402611	402611	10.18730/P68A$	INIVIT 198		19910411	Cuba		Landrace				y	y
CIP 402612	402612	10.18730/P68B=	INIVIT 203		19910411	Cuba		Landrace
CIP 402613	402613	10.18730/P68CU	INIVIT 205		19910411	Cuba		Landrace				y	y
CIP 402614	402614	10.18730/P68D0	INIVIT 206		19910411	Cuba		Landrace				y	y
CIP 402615	402615	10.18730/P68E1	INIVIT 208		19910411	Cuba		Landrace
CIP 402616	402616	10.18730/P68F2	INIVIT 209		19910411	Cuba		Landrace
CIP 402617	402617	10.18730/P68G3	INIVIT 211		19910411	Cuba		Landrace				y	y
CIP 402618	402618	10.18730/P68H4	INIVIT 212		19910411	Cuba		Landrace				y
CIP 402619	402619	10.18730/P68J5	INIVIT 217		19910411	Cuba		Landrace				y	y
CIP 402620	402620	10.18730/P68K6	INIVIT 220		19910411	Cuba		Landrace				y	y
CIP 402621	402621	10.18730/P68M7	INIVIT 222		19910411	Cuba		Landrace
CIP 402622	402622	10.18730/P68N8	INIVIT 225		19910411	Cuba		Landrace
CIP 402623	402623	10.18730/P68P9	INIVIT 227		19910411	Cuba		Landrace
CIP 402624	402624	10.18730/P67A2	INIVIT 233		19920316	Cuba		Landrace				y	y
CIP 402625	402625	10.18730/P68QA	INIVIT 291		19910411	Cuba		Landrace				y	y
CIP 402626	402626	10.18730/P68RB	INIVIT 293		19910411	Cuba		Landrace				y	y
CIP 402628	402628	10.18730/P68SC	INIVIT 356		19910411	Cuba		Landrace
CIP 402629	402629	10.18730/P68TD	INIVIT 363		19910411	Cuba		Landrace				y	y
CIP 402630	402630	10.18730/P67B3	INIVIT 413		19920316	Cuba		Landrace				y	y
CIP 402631	402631	10.18730/P68VE	INIVIT1011		19910411	Cuba		Landrace				y
CIP 402632	402632	10.18730/P68WF	INIVIT1012		19910411	Cuba		Landrace
CIP 402633	402633	10.18730/P68XG	INIVIT1013		19910411	Cuba		Landrace
CIP 402634	402634	10.18730/P68YH	INIVIT1014		19910411	Cuba		Landrace
CIP 402635	402635	10.18730/P674~	INIVIT1015		19930330	Cuba		Landrace				y
CIP 402636	402636	10.18730/P68ZJ	INIVIT1016		19910411	Cuba		Landrace				y
CIP 402638	402638	10.18730/P690K	INIVIT1018		19910411	Cuba		Landrace
CIP 402639	402639	10.18730/P691M	INIVIT1019		19910411	Cuba		Landrace				y	y
CIP 402640	402640	10.18730/P692N	INIVIT1020		19910411	Cuba		Landrace				y	y
CIP 402641	402641	10.18730/P693P	INIVIT1022		19910411	Cuba		Landrace
CIP 402642	402642	10.18730/P694Q	INIVIT1024		19910411	Cuba		Landrace
CIP 402643	402643	10.18730/P695R	INIVIT1025		19910411	Cuba		Landrace				y	y
CIP 402644	402644	10.18730/P696S	INIVIT1026		19910411	Cuba		Landrace				y
CIP 402645	402645	10.18730/P697T	INIVIT1027		19910411	Cuba		Landrace
CIP 402646	402646	10.18730/P698V	INIVIT1028		19910411	Cuba		Landrace				y	y
CIP 402647	402647	10.18730/P699W	INIVIT1029		19910411	Cuba		Landrace				y	y
CIP 402649	402649	10.18730/P69AX	INIVIT1032		19910411	Cuba		Landrace				y	y
CIP 402651	402651	10.18730/P69BY	INIVIT1034		19910411	Cuba		Landrace				y	y
CIP 402652	402652	10.18730/P69CZ	INIVIT1035		19910411	Cuba		Landrace
CIP 402653	402653	10.18730/P69D*	INIVIT1036		19910411	Cuba		Landrace				y	y
CIP 402654	402654	10.18730/P69E~	INIVIT1037		19910411	Cuba		Landrace				y	y
CIP 402655	402655	10.18730/P69F$	INIVIT1038		19910411	Cuba		Landrace
CIP 402658	402658	10.18730/P69G=	INIVIT1041		19910411	Cuba		Landrace
CIP 402659	402659	10.18730/P69HU	INIVIT1042		19910411	Cuba		Landrace				y	y
CIP 402660	402660	10.18730/P69J0	INIVIT1043		19910411	Cuba		Landrace				y	y
CIP 402661	402661	10.18730/P69K1	INIVIT1044		19910411	Cuba		Landrace				y	y
CIP 402662	402662	10.18730/P69M2	INIVIT1045		19910411	Cuba		Landrace				y	y
CIP 402663	402663	10.18730/P69N3	INIVIT1046		19910411	Cuba		Landrace				y	y
CIP 402664	402664	10.18730/P69P4	INIVIT1047		19910411	Cuba		Landrace				y	y
CIP 402665	402665	10.18730/P69Q5	INIVIT1048		19910411	Cuba		Landrace				y	y
CIP 402666	402666	10.18730/P69R6	INIVIT1049		19910411	Cuba		Landrace				y
CIP 402667	402667	10.18730/P69S7	INIVIT1050		19910411	Cuba		Landrace				y
CIP 402668	402668	10.18730/P69T8	INIVIT1051		19910411	Cuba		Landrace				y
CIP 402669	402669	10.18730/P69V9	INIVIT1052		19910411	Cuba		Landrace				y	y
CIP 402670	402670	10.18730/P69WA	INIVIT1053		19910411	Cuba		Landrace
CIP 402671	402671	10.18730/P69XB	INIVIT1054		19910411	Cuba		Landrace				y	y
CIP 402672	402672	10.18730/P69YC	INIVIT1055		19910411	Cuba		Landrace				y	y
CIP 402673	402673	10.18730/P69ZD	INIVIT1056		19910411	Cuba		Landrace
CIP 402674	402674	10.18730/P6A0E	INIVIT1057		19910411	Cuba		Landrace
CIP 402675	402675	10.18730/P6A1F	INIVIT1059		19910411	Cuba		Landrace				y	y
CIP 402676	402676	10.18730/P6A2G	INIVIT1060		19910411	Cuba		Landrace
CIP 402677	402677	10.18730/P6A3H	INIVIT1061		19910411	Cuba		Landrace
CIP 402678	402678	10.18730/P6A4J	INIVIT1062		19910411	Cuba		Landrace
CIP 402679	402679	10.18730/P6A5K	INIVIT1063		19910411	Cuba		Landrace
CIP 402680	402680	10.18730/P6A6M	INIVIT1064		19910411	Cuba		Landrace
CIP 402682	402682	10.18730/P6A7N	INIVIT1067		19910411	Cuba		Landrace				y	y
CIP 402683	402683	10.18730/P6A8P	INIVIT1068		19910411	Cuba		Landrace				y	y
CIP 402684	402684	10.18730/P6A9Q	INIVIT1069		19910411	Cuba		Landrace				y
CIP 402685	402685	10.18730/P6AAR	INIVIT1070		19910411	Cuba		Landrace
CIP 402686	402686	10.18730/P6ABS	INIVIT1071		19910411	Cuba		Landrace				y	y
CIP 402687	402687	10.18730/P6ACT	INIVIT1072		19910411	Cuba		Landrace
CIP 402688	402688	10.18730/P6ADV	INIVIT1074		19910411	Cuba		Landrace
CIP 402690	402690	10.18730/P6AEW	INIVIT1077		19910411	Cuba		Landrace				y	y
CIP 402691	402691	10.18730/P6AFX	INIVIT1078		19910411	Cuba		Landrace				y	y
CIP 402692	402692	10.18730/P6AGY	INIVIT1079		19910000	Cuba		Landrace
CIP 402693	402693	10.18730/P6AHZ	INIVIT1080		19910411	Cuba		Landrace
CIP 402694	402694	10.18730/P6AJ*	INIVIT1081		19910411	Cuba		Landrace				y	y
CIP 402695	402695	10.18730/P6AK~	INIVIT1083		19910411	Cuba		Landrace
CIP 402696	402696	10.18730/P6AM$	INIVIT1084		19910411	Cuba		Landrace				y	y
CIP 402697	402697	10.18730/P6AN=	INIVIT1085		19910411	Cuba		Landrace
CIP 402699	402699	10.18730/P6APU	INIVIT1087		19910411	Cuba		Landrace
CIP 402700	402700	10.18730/P6AQ0	INIVIT1089		19910411	Cuba		Landrace				y	y
CIP 402701	402701	10.18730/P6AR1	INIVIT1090		19910411	Cuba		Landrace				y
CIP 402702	402702	10.18730/P6AS2	INIVIT1091		19910411	Cuba		Landrace
CIP 402703	402703	10.18730/P6AT3	INIVIT1092		19910411	Cuba		Landrace
CIP 402704	402704	10.18730/P6AV4	INIVIT1093		19910411	Cuba		Landrace
CIP 402705	402705	10.18730/P6AW5	INIVIT1094		19910411	Cuba		Landrace
CIP 402706	402706	10.18730/P6AX6	INIVIT1095		19910411	Cuba		Landrace				y
CIP 402707	402707	10.18730/P6AY7	INIVIT1096		19910411	Cuba		Landrace
CIP 402708	402708	10.18730/P6AZ8	INIVIT1097		19910411	Cuba		Landrace
CIP 402709	402709	10.18730/P6B09	INIVIT1098		19910411	Cuba		Landrace
CIP 402710	402710	10.18730/P6B1A	INIVIT1099		19910411	Cuba		Landrace				y	y
CIP 402711	402711	10.18730/P6B2B	INIVIT1100		19910411	Cuba		Landrace				y	y
CIP 402712	402712	10.18730/P6B3C	INIVIT1101		19910411	Cuba		Landrace				y	y
CIP 402714	402714	10.18730/P6B4D	INIVIT1103		19910411	Cuba		Landrace				y	y
CIP 402715	402715	10.18730/P6B5E	INIVIT1104		19910411	Cuba		Landrace				y
CIP 402717	402717	10.18730/P67C4	INIVIT1210		19920316	Cuba		Landrace				y	y
CIP 402718	402718	10.18730/P67D5	INIVIT1211		19920316	Cuba		Landrace				y	y
CIP 402719	402719	10.18730/P67E6	INIVIT1213		19920316	Cuba		Landrace				y	y
CIP 402720	402720	10.18730/P67F7	INIVIT1214		19920316	Cuba		Landrace
CIP 402721	402721	10.18730/P67G8	INIVIT1216		19920316	Cuba		Landrace				y
CIP 402722	402722	10.18730/P67H9	INIVIT1217		19920316	Cuba		Landrace				y
CIP 402723	402723	10.18730/P67JA	INIVIT1229		19920316	Cuba		Landrace
CIP 402724	402724	10.18730/P67KB	IVBG 171		19920508	Argentina		LandRace
CIP 402725	402725	10.18730/P67MC	IVBG 173		19920508	Argentina		LandRace
CIP 402726	402726	10.18730/P67ND	IVBG 175		19920508	Argentina		LandRace
CIP 402727	402727	10.18730/P67PE	IVBG 176		19920508	Argentina		LandRace
CIP 402728	402728	10.18730/P67QF	IVBG 181		19920508	Argentina		LandRace
CIP 402730	402730	10.18730/3HD3	PI 508529	Miguela	19880303	Puerto Rico		LandRace				y
CIP 402731	402731	10.18730/3HE4	PRY 2	Pyta-i O Carau	19920401	Paraguay		LandRace				y
CIP 402732	402732	10.18730/3HF5	PRY 3	Pyta Guazu	19920401	Paraguay		LandRace
CIP 402733	402733	10.18730/3HG6	PRY 4	Coloradito O Moroti	19920401	Paraguay		LandRace				y	y
CIP 402734	402734	10.18730/3HH7	PRY 5	Ava O Ape O Blanca	19920401	Paraguay		LandRace
CIP 402735	402735	10.18730/3HJ8	PRY 6	Losa	19920401	Paraguay		LandRace
CIP 402736	402736	10.18730/3HK9	PRY 7	Andai	19920401	Paraguay		LandRace				y
CIP 402737	402737	10.18730/3HMA	PRY 8	Say-yu	19920401	Paraguay		LandRace
CIP 402738	402738	10.18730/3HNB	PRY 9	Taiwan	19920401	Paraguay		LandRace				y	y
CIP 402739	402739	10.18730/3HPC	PRY 12	Japonesa 1	19920401	Paraguay		LandRace				y	y
CIP 402740	402740	10.18730/3HQD	PRY 13	Japonesa 2	19920401	Paraguay		LandRace				y
CIP 402741	402741	10.18730/3HRE	PRY 14	Japonesa 3	19920401	Paraguay		LandRace				y	y
CIP 402742	402742	10.18730/3HSF	PRY 15	Japonesa 4	19920401	Paraguay		LandRace
CIP 402743	402743	10.18730/3HTG	PRY 18	Moroti	19920401	Paraguay		LandRace
CIP 402744	402744	10.18730/3HVH	PRY 19	Carau Guazu	19920401	Paraguay		LandRace				y	y
CIP 402745	402745	10.18730/3HWJ	PRY 20	Pyta-i O Carau-i	19920401	Paraguay		LandRace				y	y
CIP 402747	402747	10.18730/3HXK	PRY 148		19920401	Paraguay		LandRace
CIP 402749	402749	10.18730/3HYM	PRY 150	Taiwan	19920401	Paraguay		LandRace				y	y
CIP 402750	402750	10.18730/3HZN	PRYIAN 4	Coloradito Moroti	19930601	Paraguay	Central	LandRace			224	y
CIP 402751	402751	10.18730/3J0P	PRYIAN 8	Say-yu Yu	19930601	Paraguay	Central	LandRace			224	y
CIP 402752	402752	10.18730/P6B6F	RGNIC 1384		19910930	Nicaragua		LandRace				y
CIP 402753	402753	10.18730/P6C26	SPV 3011a		19950000	Puerto Rico		BredLine				y
CIP 402757	402757	10.18730/P6407	DLP 3327	Misionera	20130605	Argentina		LandRace
CIP 402758	402758	10.18730/P64JS	DLP 3332	Brasilera Blanca	20041210	Argentina		LandRace				y
CIP 402759	402759	10.18730/P64KT	DLP 3336	Tis-s/n	20041210	Argentina		LandRace
CIP 402760	402760	10.18730/P64MV	DLP 3338	Rojo Blanco	20041210	Argentina		LandRace				y	y
CIP 402761	402761	10.18730/P6BQ*	DLP 3342	Seedling 15	20041210	Argentina		BredLine				y
CIP 402767	402767	10.18730/3J3S	DLP 3981	Colorada		Argentina	Corrientes	LandRace	27.30 S	58.35 W	63	y	y
CIP 402768	402768	10.18730/3J4T	DLP 3983	unknown		Argentina	Corrientes	LandRace	27.30 S	58.35 W	63
CIP 402769	402769	10.18730/3J5V	DLP 3984	unknown		Argentina	Corrientes	LandRace	27.30 S	58.35 W	63	y
CIP 402782	402782	10.18730/3J6W	DLP 4003	Morada San Miguel		Argentina	Corrientes	LandRace	28.10 S	58.50 W	64
CIP 402783	402783	10.18730/3J7X	DLP 4007	Colorada		Argentina	Corrientes	LandRace	28.30 S	59.05 W	40
CIP 402786	402786	10.18730/3J8Y	DLP 4012	Amarilla		Argentina	Corrientes	LandRace	28.28 S	59.05 W	40
CIP 402787	402787	10.18730/3J9Z	DLP 4023	Batata Papa		Argentina	Corrientes	LandRace	27.50 S	57.35 W	75
CIP 402788	402788	10.18730/3JA*	DLP 4027	Nina		Argentina	Corrientes	LandRace	28.02 S	57.40 W	71
CIP 402789	402789	10.18730/3JB~	DLP 4032	Bolivar		Argentina	Corrientes	LandRace	28.15 S	57.58 W	180	y
CIP 402790	402790	10.18730/3JC$	DLP 4034	Bolivar		Argentina	Corrientes	LandRace	28.15 S	57.58 W	180
CIP 402794	402794	10.18730/3JD=	DLP 4045	Amarilla		Argentina	Misiones	LandRace	27.20 S	55.30 W	120
CIP 402796	402796	10.18730/3JEU	DLP 4051	Colorada		Argentina	Misiones	LandRace	27.40 S	55.40 W	255
CIP 402797	402797	10.18730/3JF0	DLP 4053	Blanca Grande		Argentina	Misiones	LandRace	27.40 S	55.40 W	255
CIP 402799	402799	10.18730/3JG1	DLP 4059	Yety Carau		Argentina	Misiones	LandRace	27.10 S	54.55 W	417	y	y
CIP 402803	402803	10.18730/3JH2	DLP 4063	Yety Rope	19920401	Argentina	Misiones	LandRace	27.12 S	54.56 W	417
CIP 402804	402804	10.18730/3JJ3	DLP 4064	Yety Carau		Argentina	Misiones	LandRace	27.12 S	54.56 W	417	y	y
CIP 402805	402805	10.18730/3JK4	DLP 4067	unknown		Argentina	Misiones	LandRace	27.10 S	54.56 W	417
CIP 402806	402806	10.18730/3JM5	DLP 4068	Yety Manio		Argentina	Misiones	LandRace	27.30 S	54.40 W	310
CIP 402808	402808	10.18730/3JN6	DLP 4073	Yety Hehe		Argentina	Misiones	LandRace	27.30 S	54.40 W	310	y	y
CIP 402812	402812	10.18730/3JP7	DLP 4092	Blanca		Argentina	Misiones	LandRace	26.03 S	54.45 W	760
CIP 402813	402813	10.18730/3JQ8	DLP 4093	unknown		Argentina	Misiones	LandRace	26.03 S	54.45 W	760
CIP 402815	402815	10.18730/3JR9	DLP 4095	Rosada		Argentina	Misiones	LandRace	26.20 S	53.50 W	760
CIP 402816	402816	10.18730/3JSA	DLP 4096	Tresmeses Yety Puita		Argentina	Misiones	LandRace	26.22 S	53.50 W	760
CIP 402817	402817	10.18730/3JTB	DLP 4097	Yety Moroty Guazu		Argentina	Misiones	LandRace	26.22 S	53.50 W	760
CIP 402820	402820	10.18730/3JVC	DLP 4107	Yety Manio		Argentina	Misiones	LandRace	26.55 S	55.05 W	186
CIP 402825	402825	10.18730/3JWD	DLP 4116	Yety Moroti Guazu		Argentina	Misiones	LandRace	27.02 S	55.03 W	185	y
CIP 402827	402827	10.18730/3JXE	DLP 4123	Yety Andi		Argentina	Misiones	LandRace	26.59 S	55.08 W	189	y	y
CIP 402832	402832	10.18730/3JYF	DLP 4144	unknown		Argentina	Chaco	LandRace	26.35 S	59.23 W	584
CIP 402841	402841	10.18730/3JZG	DLP 4711	Cubano		Argentina	Entre Rios	LandRace	30.55 S	58.00 W	67
CIP 402842	402842	10.18730/3K0H	DLP 4712	Blanco		Argentina	Entre Rios	LandRace	30.55 S	58.00 W	67
CIP 402846	402846	10.18730/3K1J	DLP 4716	Blanco		Argentina	Corrientes	LandRace	30.10 S	57.45 W	50
CIP 402858	402858	10.18730/3K2K	DLP 4728	Tuna		Argentina	Corrientes	LandRace	28.25 S	58.30 W	50
CIP 402862	402862	10.18730/3K3M	DLP 4733	Rosada o Zapallo		Argentina	Corrientes	LandRace	29.09 S	59.15 W	61	y
CIP 402864	402864	10.18730/3K4N	DLP 4735	Amarilla		Argentina	Corrientes	LandRace	29.02 S	59.15 W	35
CIP 402868	402868	10.18730/3K5P	DLP 4739	Unknown		Argentina	Corrientes	LandRace	28.25 S	58.20 W	79	y
CIP 402870	402870	10.18730/3K6Q	DLP 4741	Amarilla		Argentina	Corrientes	LandRace	27.48 S	56.15 W	55	y	y
CIP 402874	402874	10.18730/3K7R	DLP 4745	Blanca		Argentina	Corrientes	LandRace	27.48 S	56.15 W	55	y
CIP 402875	402875	10.18730/3K8S	DLP 4746	Amarilla Zanahoria		Argentina	Corrientes	LandRace	27.48 S	56.15 W	55
CIP 402886	402886	10.18730/3K9T	DLP 4757	Amarilla		Argentina	Corrientes	LandRace	28.38 S	56.03 W	70
CIP 402887	402887	10.18730/3KAV	DLP 4758	Batata Papa		Argentina	Corrientes	LandRace	28.38 S	56.03 W	70	y	y
CIP 402895	402895	10.18730/3KBW	DLP 4766	Morada Morada		Argentina	Corrientes	LandRace	28.15 S	55.48 W	70	y	y
CIP 402897	402897	10.18730/3KCX	DLP 4768	Batata Comun		Argentina	Corrientes	LandRace	28.15 S	55.48 W	70	y
CIP 402908	402908	10.18730/3KDY	DLP 4780	Blanca		Argentina	Corrientes	LandRace	28.15 S	55.50 W	70	y
CIP 402911	402911	10.18730/3KEZ	DLP 4784	Yema de Huevo		Argentina	Corrientes	LandRace	28.12 S	55.38 W	57
CIP 402914	402914	10.18730/3KF*	DLP 4790	Unknown		Argentina	Misiones	LandRace	28.08 S	55.40 W	121
CIP 402915	402915	10.18730/3KG~	DLP 4791	Unknown		Argentina	Misiones	LandRace	28.03 S	55.40 W	121
CIP 402918	402918	10.18730/3KH$	DLP 4795	Batata Paraguaya		Argentina	Misiones	LandRace	27.50 S	55.43 W	158
CIP 402920	402920	10.18730/3KJ=	DLP 4798	Unknown		Argentina	Misiones	LandRace	28.10 S	55.35 W	121
CIP 402923	402923	10.18730/3KKU	DLP 4802	Amarilla		Argentina	Misiones	LandRace	28.05 S	55.38 W	158
CIP 402924	402924	10.18730/3KM0	DLP 4803	Zanahoria		Argentina	Misiones	LandRace	28.10 S	55.35 W	121	y	y
CIP 402925	402925	10.18730/3KN1	DLP 4804	Amarilla		Argentina	Misiones	LandRace	28.02 S	55.34 W	157	y	y
CIP 402931	402931	10.18730/3KP2	DLP 4812	Brasilera		Argentina	Misiones	LandRace	27.52 S	55.15 W	131
CIP 402938	402938	10.18730/3KQ3	DLP 4821	Cascara Rosada		Argentina	Misiones	LandRace	27.30 S	54.54 W	176
CIP 402943	402943	10.18730/3KR4	DLP 4827	Rosada		Argentina	Misiones	LandRace	26.29 S	54.50 W	253
CIP 402953	402953	10.18730/3KS5	DLP 4839	Yety-morotii		Argentina	Misiones	LandRace	26.45 S	54.20 W	450	y	y
CIP 402954	402954	10.18730/3KT6	DLP 4840	Yety-manio		Argentina	Misiones	LandRace	26.45 S	54.20 W	450	y	y
CIP 402955	402955	10.18730/3KV7	DLP 4841	Batata Blanca		Argentina	Misiones	LandRace	26.45 S	54.20 W	450	y	y
CIP 402963	402963	10.18730/3KW8	DLP 4859	Amarilla		Argentina	Formosa	LandRace	26.22 S	58.55 W	67
CIP 402965	402965	10.18730/3KX9	DLP 4865	Morada Morada		Argentina	Formosa	LandRace	26.12 S	58.50 W	72
CIP 402967	402967	10.18730/3KYA	DLP 4869	Batata Provincia		Argentina	Formosa	LandRace	26.38 S	58.43 W	63
CIP 402968	402968	10.18730/3KZB	DLP 4871	Unknown		Argentina	Formosa	LandRace	25.18 S	57.45 W	60
CIP 402972	402972	10.18730/3M0C	DLP 4877	Colorada		Argentina	Formosa	LandRace	25.15 S	58.55 W	71
CIP 402977	402977	10.18730/3M1D	DLP 4883	Batata Colorada		Argentina	Formosa	LandRace	25.06 S	58.18 W	83	y	y
CIP 402978	402978	10.18730/3M2E	DLP 4884	Yety Mandioc		Argentina	Formosa	LandRace	25.05 S	58.20 W	146
CIP 402981	402981	10.18730/3M3F	DLP 4887	Santafesina		Argentina	Formosa	LandRace	25.10 S	58.55 W	72	y	y
CIP 402985	402985	10.18730/3M4G	DLP 4892	Unknown		Argentina	Formosa	LandRace	26.02 S	58.02 W	57
CIP 402986	402986	10.18730/3M5H	DLP 4894	Cubana		Argentina	Formosa	LandRace	24.48 S	60.30 W	131
CIP 402987	402987	10.18730/3M6J	DLP 4895	Batata Papa		Argentina	Formosa	LandRace	24.42 S	60.40 W	133
CIP 402999	402999	10.18730/3M8M	DLP 4912	Blanca		Argentina	Formosa	LandRace	24.30 S	61.35 W	130	y	y
CIP 403000	403000	10.18730/3M9N	DLP 4913	Batata Amarilla		Argentina	Formosa	LandRace	24.30 S	61.35 W	130
CIP 403001	403001	10.18730/3MAP	DLP 4915	Blanca		Argentina	Formosa	LandRace	24.30 S	61.35 W	130
CIP 403003	403003	10.18730/3MBQ	DLP 4917	Batata Blanca		Argentina	Chaco	LandRace	26.10 S	59.37 W	91
CIP 403007	403007	10.18730/3MDS	DLP 4922	Colorada		Argentina	Chaco	LandRace	26.06 S	60.35 W	110	y
CIP 403008	403008	10.18730/3MET	DLP 4923	Blanca		Argentina	Chaco	LandRace	26.06 S	60.35 W	110
CIP 403009	403009	10.18730/3MFV	DLP 4925	Batata Colorada		Argentina	Chaco	LandRace	26.20 S	60.25 W	105
CIP 403021	403021	10.18730/3MGW	DLP 4949	Paraguaya		Argentina	Chaco	LandRace	26.52 S	60.25 W	85	y
CIP 403024	403024	10.18730/3MHX	DLP 4952	Blanca		Argentina	Chaco	LandRace	26.52 S	60.25 W	85	y
CIP 403025	403025	10.18730/3MJY	DLP 4956	Colorada		Argentina	Chaco	LandRace	27.08 S	60.38 W	90
CIP 403031	403031	10.18730/3MKZ	DLP 4966	Amarilla		Argentina	Formosa	LandRace	26.20 S	59.23 W	81
CIP 403036	403036	10.18730/3MM*	DLP 4973	Amarilla		Argentina	Santa Fe	LandRace	29.30 S	59.45 W	48
CIP 403038	403038	10.18730/3MN~	DLP 4975	Estriada		Argentina	Santa Fe	LandRace	30.49 S	60.25 W	26
CIP 403039	403039	10.18730/3MP$	DLP 4976	Anaranjada		Argentina	Santa Fe	LandRace	30.49 S	60.25 W	26
CIP 403040	403040	10.18730/3MQ=	DLP 4977	Blanca		Argentina	Entre Rios	LandRace	31.58 S	60.38 W	60
CIP 403041	403041	10.18730/P7EAX	EC 137		19950520	Argentina		LandRace				y	y
CIP 403042	403042	10.18730/P7EBY	EC 141		19950520	Argentina		LandRace				y
CIP 403043	403043	10.18730/P7ECZ	EC 154		19950520	Argentina		LandRace
CIP 403044	403044	10.18730/P7ED*	EC 164		19950520	Argentina		LandRace
CIP 403045	403045	10.18730/P7EE~	EC 165		19950520	Argentina		LandRace
CIP 403046	403046	10.18730/P7EF$	EC 167		19950520	Argentina		LandRace
CIP 403047	403047	10.18730/P64NW	EC 168		20040930	Argentina		LandRace
CIP 403048	403048	10.18730/P7EG=	EC 221		19950520	Argentina		LandRace				y
CIP 403049	403049	10.18730/P7EHU	EC 377		19950520	Argentina		LandRace				y
CIP 403176	403176	10.18730/3MV2	PDRAL 2747	Unknown Bra-007196	19900528	Brazil	Mato Grosso	LandRace	15.30 S	53.05 S	380
CIP 403343	403343	10.18730/3P57	LL 87-1791	Batata Blanca	19880505	Colombia		LandRace
CIP 403345	403345	10.18730/3P68	LL 87-1799	Batata	19880505	Colombia		LandRace
CIP 403380	403380		INIVIT 9	Blanco Especial	19940201	Cuba		Landrace
CIP 403381	403381		INIVIT 10	Blanco Redondo	19940201	Cuba		Landrace				y	y
CIP 403383	403383		INIVIT 12	Blanco U.c.	19940201	Cuba		Landrace
CIP 403392	403392		INIVIT 46	Habanista	19940201	Cuba		Landrace				y
CIP 403429	403429	10.18730/3PDF	CESDA 3-C-N	3-C-N	19860812	Dominican Republic		BredLine				y
CIP 403430	403430	10.18730/3PEG	CESDA10-C-1	10-C-1	19860812	Dominican Republic		BredLine
CIP 403431	403431	10.18730/3PFH	CESDA861083	86-1083	19860812	Dominican Republic		BredLine				y
CIP 403432	403432	10.18730/3PGJ	CESDA861229	86-1229	19860812	Dominican Republic		BredLine
CIP 403433	403433	10.18730/3PHK	CESDA861601	86-1601	19860812	Dominican Republic		BredLine				y
CIP 403434	403434	10.18730/3PJM	CESDA861602	86-1602	19860812	Dominican Republic		BredLine				y
CIP 403435	403435	10.18730/3PKN	CESDA861607	86-1607	19860812	Dominican Republic		BredLine				y
CIP 404018	404018	10.18730/3S0R	J 2		19891000	Mexico		LandRace				y
CIP 404019	404019	10.18730/3S1S	J 10		19891000	Mexico		LandRace
CIP 404020	404020	10.18730/3S2T	J 15		19891000	Mexico		LandRace
CIP 404021	404021	10.18730/3S3V	J 16		19891000	Mexico		LandRace
CIP 404022	404022	10.18730/3S4W	J 17		19860111	Mexico		LandRace
CIP 404023	404023	10.18730/3S5X	J 20		19891000	Mexico		LandRace
CIP 404024	404024	10.18730/3S6Y	J 23		19891000	Mexico		LandRace				y
CIP 404025	404025	10.18730/3S7Z	J 28		19891000	Mexico		LandRace					y
CIP 404026	404026	10.18730/3S8*	J 29		19891000	Mexico		LandRace
CIP 404027	404027	10.18730/3S9~	J 33		19891000	Mexico		LandRace				y
CIP 404028	404028	10.18730/3SA$	J 34		19891000	Mexico		LandRace
CIP 404639	404639	10.18730/3SM7	DLP 5278	Batata Louca		Paraguay	Alto Parana	LandRace	25.30 S	54.41 W	260	y	y
CIP 404641	404641	10.18730/3SN8	PRY 1		19920401	Paraguay		LandRace
CIP 404707	404707	10.18730/3SVE	DLP 856	Unknown		Venezuela		LandRace
CIP 404709	404709	10.18730/3SWF	PRY 27	Moroti	19920401	Paraguay		LandRace				y	y
CIP 404710	404710	10.18730/3SXG	RD 2594		19890207	Dominican Republic		LandRace
CIP 404711	404711	10.18730/3SYH	RD 1536		19890207	Dominican Republic		LandRace
CIP 404712	404712		AB 94065.4			Unknown		Unknown Sample Status				y
CIP 420001	420001	10.18730/3SZJ	RCB IT- 24	Paramongui.Naranja Oscuro	19850927	Peru		BredLine
CIP 420002	420002	10.18730/3T0K	RCB IT- 28	Huanca	19850927	Peru		ImpVariety
CIP 420003	420003	10.18730/3T1M	RCB IT- 29	Huarco	19850927	Peru		BredLine				y
CIP 420004	420004	10.18730/3T2N	RCB IT- 30	Mamala	19850927	Peru		ImpVariety
CIP 420005	420005	10.18730/3T3P	RCB IT- 31	Nemanete	19850927	Peru		ImpVariety				y
CIP 420006	420006	10.18730/3T4Q	RCB IT- 32	Chuquimanco 1	19850927	Peru		BredLine
CIP 420007	420007	10.18730/3T5R	RCB IT- 35	Canchari	19850927	Peru		BredLine				y
CIP 420008	420008	10.18730/3T6S	RCB IT- 36	Maria Angola	19850927	Peru		ImpVariety
CIP 420009	420009	10.18730/3T7T	RCB IT- 39	Japones Tresmesino Select	19850927	Peru		BredLine				y
CIP 420010	420010	10.18730/3T8V	RCB IT- 41	Teo Boza	19850927	Peru		BredLine
CIP 420011	420011	10.18730/3T9W	RCB IT- 42	Jorpaez	19850927	Peru		BredLine				y
CIP 420012	420012	10.18730/3TAX	RCB IT- 47	Elyda	19850927	Peru		BredLine				y
CIP 420013	420013	10.18730/3TBY	RCB IT- 48	Raroira	19850927	Peru		BredLine
CIP 420014	420014	10.18730/3TCZ	RCB IT- 49	Jonathan	19850927	Peru		ImpVariety				y
CIP 420015	420015	10.18730/3TD*	RCB IT- 50	Carsaettone	19850927	Peru		BredLine				y
CIP 420017	420017	10.18730/3TF$	RCB IT-137	Lanceolado	19850927	Peru		ImpVariety				y
CIP 420018	420018	10.18730/3TG=	RCB IN-122	Blanco de Agua Dulce	19850927	Peru	Lima	Landrace	13.00 S	76.00 W	5
CIP 420019	420019	10.18730/3THU	RCB IN-162	Pedro	19850927	Peru	Tumbes	Landrace	3.30 S	80.30 W	8	y	y
CIP 420020	420020	10.18730/3TJ0	RCB IN-262	Huarmeyano	19850927	Peru	Ancash	Landrace	10.00 S	78.00 W	12	y	y
CIP 420021	420021	10.18730/3TK1	ARB 231	Camote Negro	19850309	Peru	Cajamarca	LandRace			2188	y
CIP 420022	420022	10.18730/3TM2	ARB 426	Pata De Oso	19850309	Peru	La Libertad	LandRace			311	y	y
CIP 420023	420023	10.18730/3TN3	DLP 298	unknown		Peru	Arequipa	LandRace	16.50 S	72.10 W	1654
CIP 420024	420024	10.18730/3TP4	DLP 886	unknown		Peru	Lima	LandRace	11.05 S	77.05 W	1243
CIP 420025	420025	10.18730/3TQ5	DLP 1912	Camote Yuca		Peru	Cajamarca	LandRace	7.50 S	78.05 W	2727
CIP 420026	420026	10.18730/3TR6	DLP 1913	Camote Tallo		Peru	Cajamarca	LandRace	7.50 S	78.05 W	2727	y	y
CIP 420027	420027	10.18730/3TS7	DLP 1914	Zapallo		Peru	Cajamarca	LandRace	7.45 S	78.10 W	2251		y
CIP 420028	420028	10.18730/3TT8	DLP 2247	unknown		Peru	Ancash	LandRace	9.05 S	77.50 W	4780	y	y
CIP 420029	420029	10.18730/3TV9	RCB IN- 73	Papel	19850927	Peru	Lima	Landrace	13.00 S	76.00 W	4
CIP 420030	420030	10.18730/P7EJ0	UNJBG 20	Papilla Mala Hierba	19951010	Peru	Tacna	Landrace			564
CIP 420031	420031	10.18730/3TWA	ARB 320	Cascajo Morado	19850309	Peru	Lima	LandRace			1638
CIP 420032	420032	10.18730/3TXB	ARB 350	Sangre de Venado	19850309	Peru	Lima	LandRace			1100
CIP 420033	420033	10.18730/3TYC	ARB 445	ZAPALLO o COSTENO	19850309	Peru	Cajamarca	LandRace			2079
CIP 420034	420034	10.18730/3TZD	ARB 535	Cambray	19850309	Peru	Arequipa	LandRace			1800	y
CIP 420035	420035	10.18730/3V0E	ARB 561	Camote Blanco	19850309	Peru	Tacna	LandRace			81	y	y
CIP 420038	420038	10.18730/3V3H	RCB IN- 17	Torreblanca	19850927	Peru	Arequipa	Landrace	17.00 S	73.00 W	18
CIP 420039	420039	10.18730/3V4J	RCB IN- 25	Esperma	19850927	Peru	La Libertad	Landrace	7.00 S	79.00 W	135	y	y
CIP 420040	420040	10.18730/3V5K	RCB IN-146	Negrito Del Ihuanco	19850927	Peru	Lima	Landrace	13.00 S	76.00 W	17
CIP 420041	420041	10.18730/3V6M	RCB IN-191	Norteno	19850927	Peru	Ica	Landrace	14.00 S	76.30 W	408
CIP 420042	420042	10.18730/3V7N	RCB IN-207	Chancleta Prieto	19850927	Peru	Lima	Landrace	13.00 S	76.30 W	29
CIP 420043	420043	10.18730/3V8P	RCB IN-209	Limeno de Quilmana	19850927	Peru	Lima	Landrace	13.00 S	76.30 W	146
CIP 420044	420044	10.18730/3V9Q	RCB IN-219	Blanco De Las Joyas	19850927	Peru	Lima	Landrace	12.30 S	77.00 W	13	y	y
CIP 420045	420045	10.18730/3VAR	RCB IN-277	Canetano	19850927	Peru	Lima	Landrace			45	y
CIP 420046	420046	10.18730/3VBS	DLP 56	Espelma Blanco		Peru	La Libertad	LandRace	7.20 S	79.00 W	38
CIP 420047	420047	10.18730/3VCT	DLP 101	Estrella		Peru	Lambayeque	LandRace	5.50 S	79.50 W	126	y	y
CIP 420048	420048	10.18730/3VDV	DLP 170	Camote Rosita		Peru	Piura	LandRace	4.30 S	80.00 W	1778
CIP 420051	420051	10.18730/3VGY	DLP 352	Chinchano		Peru	Moquegua	LandRace	17.20 S	70.50 W	2348
CIP 420052	420052	10.18730/3VHZ	DLP 1127	Manzachina		Peru	Ancash	LandRace	9.15 S	77.50 W	2535
CIP 420053	420053	10.18730/3VJ*	DLP 1128	Capadito		Peru	Ancash	LandRace	9.15 S	77.50 W	2535
CIP 420054	420054	10.18730/3VK~	DLP 1909	Giganton		Peru	Cajamarca	LandRace	7.50 S	78.05 W	2727
CIP 420056	420056	10.18730/3VN=	DLP 2238	Manta China		Peru	Ancash	LandRace	9.10 S	77.50 W	2466	y	y
CIP 420057	420057	10.18730/3VPU	DLP 2242	Morado		Peru	Ancash	LandRace	9.05 S	77.10 W	2876	y	y
CIP 420058	420058	10.18730/3VQ0	DLP 2317	Amarillo		Peru	Ancash	LandRace	9.30 S	78.05 W	538	y	y
CIP 420059	420059	10.18730/3VR1	DLP 2318	Romerito		Peru	Ancash	LandRace	9.30 S	78.05 W	538
CIP 420061	420061	10.18730/3VT3	DLP 2364	unknown		Peru	Ica	LandRace	13.50 S	75.45 W	543
CIP 420064	420064	10.18730/3VX6	RCB IN-276	Paramonguino	19850927	Peru	Lima	Landrace			45
CIP 420065	420065	10.18730/3VY7	RCB IN- 2	Huachano	19850927	Peru		Landrace
CIP 420066	420066	10.18730/3VZ8	RCB IN- 52	Ihuanco	19850927	Peru	Lima	Landrace	13.00 S	76.30 W	124	y	y
CIP 420067	420067	10.18730/3W09	DLP 650	unknown		Peru	Loreto	LandRace	5.50 S	76.10 W	140	y	y
CIP 420068	420068	10.18730/3W1A	ARBUNAP 55	Camote Sal	19890915	Peru	Amazonas	LandRace			2423	y	y
CIP 420069	420069	10.18730/3W2B	RCB IT- 5	Joto-joto	19850927	Peru		BredLine				y
CIP 420070	420070	10.18730/3W3C	RCB IT-120	Rosa Elvira	19850927	Peru		BredLine				y
CIP 420071	420071	10.18730/3W4D	ARB 533	Milagro	19850309	Peru	Arequipa	LandRace			1800
CIP 420072	420072	10.18730/3W5E	DLP 26	Blanco		Peru	La Libertad	LandRace	8.30 S	78.30 W	52
CIP 420073	420073	10.18730/3W6F	DLP 265	Blanco		Peru	Lima	LandRace	10.30 S	77.10 W	78	y
CIP 420075	420075	10.18730/3W7G	DLP 2173	unknown		Peru	Cajamarca	LandRace	7.08 S	79.05 W	680	y	y
CIP 420076	420076	10.18730/3W8H	DLP 2276	unknown		Peru	Lima	LandRace	11.30 S	77.15 W	331	y
CIP 420077	420077	10.18730/3W9J	DLP 2348	Lurinero		Peru	Lima	LandRace	13.00 S	76.17 W	300
CIP 420078	420078	10.18730/3WAK	DLP 2357	unknown		Peru	Ica	LandRace	13.55 S	75.50 W	482
CIP 420079	420079	10.18730/3WBM	RCB IN-138	Amarillo Cuzqueno	19850927	Peru	Cusco	Landrace	13.00 S	73.00 W	1153		y
CIP 420080	420080	10.18730/3WCN	DLP 2401	Camote Amarillo		Peru	Lima	LandRace	11.24 S	76.32 W	2804	y	y
CIP 420081	420081	10.18730/3WDP	RCB 4353-H	unknown	19850927	Peru		BredLine				y
CIP 420082	420082	10.18730/3WEQ	ARB 292	Camote Morado	19850309	Peru	Cajamarca	LandRace			1669
CIP 420083	420083	10.18730/3WFR	ARB 377	Camote Flor De Romero	19850309	Peru	Ancash	LandRace			1285	y	y
CIP 420084	420084	10.18730/3WGS	DLP 912	Tine Culo		Peru	Cajamarca	LandRace	7.20 S	77.40 W	2673	y	y
CIP 420085	420085	10.18730/3WHT	DLP 3282	Apichu Morado		Peru	Puno	LandRace	13.20 S	70.20 W	1600	y	y
CIP 420086	420086	10.18730/3WJV	RCB IN- 85	Lurin	19850927	Peru	Lima	Landrace	11.00 S	78.00 W	66
CIP 420087	420087	10.18730/3WKW	I01412	Blanco Local UNPRG 8	19910927	Peru		LandRace
CIP 420088	420088	10.18730/3WMX	I01413	Amarillo Local UNPRG 11	19910927	Peru		LandRace				y
CIP 420089	420089	10.18730/3WNY	I01417	Chilingano UNPRG 23	19910927	Peru		LandRace
CIP 420090	420090	10.18730/3WPZ	I01418	Corazon Huarango UNPRG 31	19910927	Peru		LandRace				y	y
CIP 420091	420091	10.18730/3WQ*	I01419	Pedro Juan UNPRG 38	19910927	Peru		LandRace				y	y
CIP 420092	420092	10.18730/3WR~	I01420	C. 5 - EALM UNPRG 41	19910927	Peru		LandRace
CIP 420093	420093	10.18730/3WS$	I01424	Perotito UNPRG 56	19910927	Peru		LandRace
CIP 420094	420094	10.18730/3WT=	I01422	Huachano UNPRG 46	19910927	Peru		LandRace
CIP 420096	420096	10.18730/3WVU	INIA A	Limeno Morado	19930901	Peru		LandRace
CIP 420097	420097	10.18730/3WW0	INIA B	Trujillano	19930901	Peru		LandRace
CIP 420098	420098	10.18730/3WX1	ARB 127	Camote Bonito Amarillo	19850309	Peru	Huánuco	LandRace			1934	y	y
CIP 420099	420099	10.18730/3WY2	ARB 128a	Camote Trujillo	19850309	Peru	Huánuco	LandRace			1934	y	y
CIP 420100	420100	10.18730/3WZ3	ARB 129	Camote Cambray	19850309	Peru	Huánuco	LandRace			2050
CIP 420101	420101	10.18730/3X04	ARB 130	Chulquino	19850309	Peru	Huánuco	LandRace			2050	y	y
CIP 420102	420102	10.18730/3X15	ARB 133	Camote Extranjero Colorad	19850309	Peru	Huánuco	LandRace			2150	y	y
CIP 420103	420103	10.18730/3X26	ARB 155	Kumal Morado	19850309	Peru	San Martín	LandRace			282	y	y
CIP 420105	420105	10.18730/3X48	ARB 199	Waqcha Kuyaq	19850309	Peru	Amazonas	LandRace			2053	y	y
CIP 420106	420106	10.18730/3X59	ARB 221	Camote Cambray	19850309	Peru	Amazonas	LandRace			2522
CIP 420107	420107	10.18730/3X6A	ARB 247	Camote Locre De Sal	19850309	Peru	Cajamarca	LandRace			2495	y	y
CIP 420108	420108	10.18730/3X7B	ARB 291	Camote Locre De Sal	19850309	Peru	Cajamarca	LandRace			1669
CIP 420109	420109	10.18730/3X8C	ARB 304	Camote Acaro	19850309	Peru	Cajamarca	LandRace			2306
CIP 420110	420110	10.18730/3X9D	ARB 306	Pan Camote	19850309	Peru	Cajamarca	LandRace			2306
CIP 420111	420111	10.18730/3XAE	ARB 307	Camote Espelma	19850309	Peru	Cajamarca	LandRace			2209	y	y
CIP 420112	420112	10.18730/3XBF	ARB 311	Camote Munano	19850309	Peru	Cajamarca	LandRace			2312
CIP 420113	420113	10.18730/3XCG	ARB 323	Camote Papa	19850309	Peru	Lima	LandRace			1638	y	y
CIP 420114	420114	10.18730/3XDH	ARB 347	Camote	19850309	Peru	Ancash	LandRace			2804	y	y
CIP 420115	420115	10.18730/3XEJ	ARB 354	Camote Harina	19850309	Peru	Lima	LandRace			1325	y	y
CIP 420116	420116	10.18730/3XFK	ARB 355	Camote Huayro	19850309	Peru	Lima	LandRace			1630	y	y
CIP 420117	420117	10.18730/3XGM	ARB 359	Shilpo	19850309	Peru	Ancash	LandRace			1330
CIP 420118	420118	10.18730/3XHN	ARB 379	Camote Zanahoria	19850309	Peru	Ancash	LandRace			1285	y	y
CIP 420119	420119	10.18730/3XJP	ARB 381	Camote Angelica	19850309	Peru	Ancash	LandRace			1285
CIP 420120	420120	10.18730/3XKQ	ARB 394	Camote Pikis	19850309	Peru	Ancash	LandRace			1775	y	y
CIP 420121	420121	10.18730/3XMR	ARB 407	Camote Blanco	19850309	Peru	Ancash	LandRace			1782	y	y
CIP 420122	420122	10.18730/3XNS	ARB 408	Camote Samuel	19850309	Peru	Ancash	LandRace			1782	y	y
CIP 420123	420123	10.18730/3XPT	ARB 409	Camote de Perro	19850309	Peru	Ancash	LandRace			1782	y	y
CIP 420124	420124	10.18730/3XQV	ARB 410	Camote Pampino	19850309	Peru	Ancash	LandRace			1782	y	y
CIP 420125	420125	10.18730/3XRW	ARB 412	Camote Blanco	19850309	Peru	Ancash	LandRace			1782
CIP 420126	420126	10.18730/3XSX	ARB 421	unknown	19850309	Peru	Ancash	LandRace			1451	y
CIP 420127	420127	10.18730/3XTY	ARB 424	Pecho de Paloma	19850309	Peru	La Libertad	LandRace			311
CIP 420128	420128	10.18730/3XVZ	ARB 447	Morado Fino	19850309	Peru	Cajamarca	LandRace			2079
CIP 420129	420129	10.18730/3XW*	ARB 449	Blanco	19850309	Peru	Cajamarca	LandRace			2079	y	y
CIP 420130	420130	10.18730/3XX~	ARB 472	Camote Blanco	19850309	Peru	Piura	LandRace			93
CIP 420131	420131	10.18730/3XY$	ARB 473	Camote Morado	19850309	Peru	Piura	LandRace			93
CIP 420132	420132	10.18730/3XZ=	ARB 486	Camote No Tengas Pena	19850309	Peru	Tumbes	LandRace			17	y	y
CIP 420134	420134	10.18730/3Y10	ARB 500	unknown	19850309	Peru		LandRace				y	y
CIP 420135	420135	10.18730/3Y21	ARB 517	Torre Blanco	19850309	Peru	Arequipa	LandRace			1
CIP 420136	420136	10.18730/3Y32	ARB 548	Saco Largo	19850309	Peru	Tacna	LandRace			1140	y	y
CIP 420137	420137	10.18730/3Y43	ARB 550	Camote Blanco	19850309	Peru	Tacna	LandRace			1140
CIP 420138	420138	10.18730/3Y54	ARB 557	Camote Blanco	19850309	Peru	Tacna	LandRace			15	y
CIP 420139	420139	10.18730/3Y65	ARB 577	Torre Blanco	19850309	Peru	Arequipa	LandRace			61
CIP 420140	420140	10.18730/3Y76	ARB 597	Wayru	19850309	Peru	Ayacucho	LandRace			2081
CIP 420141	420141	10.18730/3Y87	ARB 601	Camote Morado	19850309	Peru	Ayacucho	LandRace			2081	y	y
CIP 420142	420142	10.18730/3Y98	ARB 611	Maymichacra	19850309	Peru	Ayacucho	LandRace			2313
CIP 420143	420143	10.18730/3YA9	ARB 618	Camote Rosado	19850309	Peru	Apurímac	LandRace			1935	y	y
CIP 420144	420144	10.18730/3YBA	ARB 634	Yuraq Apichu	19850309	Peru	Cusco	LandRace			2671
CIP 420145	420145	10.18730/3YCB	ARB 9997	Blanco	19850309	Peru		LandRace				y	y
CIP 420146	420146	10.18730/3YDC	ARBUNAP 15	Camote Blanco	19890915	Peru	San Martín	LandRace			600	y	y
CIP 420147	420147	10.18730/3YED	ARBUNAP 18	Camote	19890915	Peru	San Martín	LandRace			751	y
CIP 420148	420148	10.18730/3YFE	ARBUNAP 24	Idank	19890915	Peru	San Martín	LandRace			831	y	y
CIP 420149	420149	10.18730/3YGF	ARBUNAP 35	Camote	19890915	Peru	San Martín	LandRace			219	y
CIP 420150	420150	10.18730/3YHG	ARBUNAP 56	Camote Sal	19890915	Peru	Amazonas	LandRace			2423
CIP 420151	420151	10.18730/3YJH	ARBUNAP 63	Camote Potocho	19890915	Peru	Amazonas	LandRace			2008
CIP 420152	420152	10.18730/3YKJ	ARBUNAP 74	Kumala Balanco	19890915	Peru	San Martín	LandRace			300	y	y
CIP 420153	420153	10.18730/3YMK	DLP 36	Zapallo		Peru	La Libertad	LandRace	8.00 S	78.20 W	29	y
CIP 420154	420154	10.18730/3YNM	DLP 50	Amarillo Viru		Peru	La Libertad	LandRace	8.10 S	79.05 W	35
CIP 420155	420155	10.18730/3YPN	DLP 52	Boca de Chisco		Peru	La Libertad	LandRace	8.10 S	79.05 W	301	y	y
CIP 420156	420156	10.18730/3YQP	DLP 60	unknown		Peru	La Libertad	LandRace	7.20 S	79.00 W	38	y
CIP 420157	420157	10.18730/3YRQ	DLP 70	unknown		Peru	Lambayeque	LandRace	6.50 S	79.40 W	83	y	y
CIP 420158	420158	10.18730/3YSR	DLP 72	unknown		Peru	Lambayeque	LandRace	6.50 S	79.40 W	83
CIP 420159	420159	10.18730/3YTS	DLP 93	Rosado		Peru	Cajamarca	LandRace	7.12 S	78.50 W	1315	y
CIP 420160	420160	10.18730/3YVT	DLP 103	Trujillano		Peru	Lambayeque	LandRace	5.50 S	79.50 W	126	y
CIP 420161	420161	10.18730/3YWV	DLP 114	Blanco de Colan		Peru	Piura	LandRace	5.00 S	80.38 W	36	y	y
CIP 420163	420163	10.18730/3YYX	DLP 123	Morado Morado		Peru	Piura	LandRace	6.00 S	80.50 W	7	y	y
CIP 420164	420164	10.18730/3YZY	DLP 142	Valencia		Peru	Piura	LandRace	5.00 S	81.00 W	76	y	y
CIP 420165	420165	10.18730/3Z0Z	DLP 172	Solada		Peru	Piura	LandRace	4.30 S	80.00 W	1778	y	y
CIP 420166	420166	10.18730/3Z1*	DLP 194	unknown		Peru	Piura	LandRace	5.30 S	79.30 W	1949	y	y
CIP 420167	420167	10.18730/3Z2~	DLP 197	Pata Gallina/chilpo Morad		Peru	Piura	LandRace	5.30 S	79.30 W	1740	y	y
CIP 420168	420168	10.18730/3Z3$	DLP 256	Camote Papa		Peru	Lima	LandRace	3.40 S	77.10 W	217
CIP 420169	420169	10.18730/3Z4=	DLP 275a	Tabon		Peru	Lima	LandRace	10.40 S	77.50 W	100	y	y
CIP 420170	420170	10.18730/3Z5U	DLP 279	Yema de Huevo		Peru	Lima	LandRace	10.40 S	77.50 W	0	y	y
CIP 420171	420171	10.18730/3Z60	DLP 301	Morado		Peru	Arequipa	LandRace	16.50 S	72.10 W	1654
CIP 420172	420172	10.18730/3Z71	DLP 311	Valdivia		Peru	Arequipa	LandRace	17.30 S	71.30 W
CIP 420173	420173	10.18730/3Z82	DLP 318	unknown		Peru	Arequipa	LandRace	15.50 S	74.20 W	61
CIP 420174	420174	10.18730/3Z93	DLP 321	Yema de Huevo		Peru	Arequipa	LandRace	15.50 S	74.20 W	61
CIP 420175	420175	10.18730/3ZA4	DLP 325	Torre Blanca		Peru	Arequipa	LandRace	15.40 S	74.10 W	449
CIP 420176	420176	10.18730/3ZB5	DLP 326	Morado		Peru	Arequipa	LandRace	15.40 S	74.10 W	449
CIP 420177	420177	10.18730/3ZC6	DLP 339	Milagro		Peru	Arequipa	LandRace	15.53 S	73.24 W	2086	y	y
CIP 420178	420178	10.18730/3ZD7	DLP 544	unknown		Peru	Huánuco	LandRace	9.40 S	76.05 W	1900
CIP 420180	420180	10.18730/3ZF9	DLP 663	unknown		Peru	Pasco	LandRace	10.40 S	75.40 W	1698
CIP 420181	420181	10.18730/3ZGA	DLP 887	unknown		Peru	Lima	LandRace	11.05 S	77.05 W	1243	y
CIP 420182	420182	10.18730/3ZHB	DLP 892	unknown		Peru	Lima	LandRace	11.40 S	77.20 W	53
CIP 420183	420183	10.18730/3ZJC	DLP 903	Morado		Peru	Cajamarca	LandRace	7.10 S	78.05 W	2276
CIP 420184	420184	10.18730/3ZKD	DLP 906	Camote Negro		Peru	Cajamarca	LandRace	7.20 S	77.40 W	2673
CIP 420185	420185	10.18730/3ZME	DLP 911	unknown		Peru	Cajamarca	LandRace	7.20 S	77.40 W	2673	y
CIP 420188	420188	10.18730/3ZQH	DLP 925	Amarillo		Peru	Cajamarca	LandRace	6.50 S	77.50 W	2188	y	y
CIP 420189	420189	10.18730/3ZRJ	DLP 929	unknown		Peru	Cajamarca	LandRace	6.50 S	77.50 W	2188	y	y
CIP 420190	420190	10.18730/3ZSK	DLP 943	Bocachisco		Peru	La Libertad	LandRace	8.05 S	78.10 W	338	y	y
CIP 420191	420191	10.18730/3ZTM	DLP 944	Amarillo		Peru	La Libertad	LandRace	8.05 S	78.10 W	338	y
CIP 420192	420192	10.18730/3ZVN	DLP 953	Chilpe		Peru	La Libertad	LandRace	8.05 S	78.50 W	512	y
CIP 420193	420193	10.18730/3ZWP	DLP 957	unknown		Peru	La Libertad	LandRace	8.05 S	78.50 W	512
CIP 420194	420194	10.18730/3ZXQ	DLP 1090	unknown		Peru	Piura	LandRace	4.55 S	80.40 W	20	y	y
CIP 420195	420195	10.18730/3ZYR	DLP 1111	Casquino		Peru	La Libertad	LandRace	7.40 S	79.05 W	311	y	y
CIP 420196	420196	10.18730/3ZZS	DLP 1116	Zapallo		Peru	La Libertad	LandRace	7.40 S	79.05 W	311
CIP 420197	420197	10.18730/400T	DLP 1131	De La Costa		Peru	Ancash	LandRace	9.05 S	77.55 W	2710
CIP 420198	420198	10.18730/401V	DLP 1142	Rojo		Peru	Ancash	LandRace	10.05 S	77.20 W	2330	y	y
CIP 420199	420199	10.18730/402W	DLP 1315	Durazno		Peru	Pasco	LandRace	10.20 S	75.50 W	552	y	y
CIP 420200	420200	10.18730/403X	DLP 1318	unknown		Peru	Pasco	LandRace	10.40 S	75.30 W	1556
CIP 420201	420201	10.18730/404Y	DLP 1388	unknown		Peru	Puno	LandRace	13.15 S	69.30 W	1700	y
CIP 420202	420202	10.18730/405Z	DLP 1901	Chiclayo		Peru	Cajamarca	LandRace	7.50 S	78.05 W	2727	y	y
CIP 420203	420203	10.18730/406*	DLP 1907	Morado Chico		Peru	Cajamarca	LandRace	7.50 S	78.05 W	2727	y	y
CIP 420204	420204	10.18730/407~	DLP 1917	unknown		Peru	Cajamarca	LandRace	7.45 S	78.10 W	2251	y	y
CIP 420205	420205	10.18730/408$	DLP 1920	Morado		Peru	Cajamarca	LandRace	7.45 S	78.10 W	2251	y	y
CIP 420206	420206	10.18730/409=	DLP 1930	Pierna De Viuda		Peru	Cajamarca	LandRace	7.25 S	78.05 W	3115	y	y
CIP 420207	420207	10.18730/40AU	DLP 1936	Negro Morado		Peru	Cajamarca	LandRace	7.35 S	78.50 W	3357	y	y
CIP 420208	420208	10.18730/40B0	DLP 1941	Paijanero		Peru	Cajamarca	LandRace	7.35 S	78.55 W	1267
CIP 420209	420209	10.18730/40C1	DLP 1952	unknown		Peru	Cajamarca	LandRace	7.35 S	78.40 W	500	y	y
CIP 420210	420210	10.18730/40D2	DLP 1957	Saitana Morado		Peru	Cajamarca	LandRace	7.30 S	78.33 W	180	y
CIP 420212	420212	10.18730/40F4	DLP 1969	unknown		Peru	La Libertad	LandRace	8.10 S	78.55 W	10
CIP 420213	420213	10.18730/40G5	DLP 1979	unknown		Peru	Moquegua	LandRace	10.15 S	70.58 W	1418	y	y
CIP 420214	420214	10.18730/40H6	DLP 1985	Blanco		Peru	Lima	LandRace	12.10 S	76.50 W	465	y	y
CIP 420216	420216	10.18730/40J7	DLP 2000	Morado		Peru	Lima	LandRace	11.55 S	76.40 W	125	y	y
CIP 420217	420217	10.18730/40K8	DLP 2003	Blanco Oca		Peru	Lima	LandRace	11.55 S	76.40 W	125	y
CIP 420218	420218	10.18730/40M9	DLP 2009	unknown		Peru	Lima	LandRace	11.50 S	76.35 W	175	y	y
CIP 420219	420219	10.18730/40NA	DLP 2010	unknown		Peru	Lima	LandRace	11.50 S	76.35 W	175
CIP 420220	420220	10.18730/40PB	DLP 2197	Blanco		Peru	Cajamarca	LandRace	5.58 S	78.56 W	955	y	y
CIP 420221	420221	10.18730/40QC	DLP 2215	unknown		Peru	Ancash	LandRace	9.08 S	78.12 W	2305	y	y
CIP 420222	420222	10.18730/40RD	DLP 2219	Colorado		Peru	Ancash	LandRace	9.05 S	77.50 W	2202	y	y
CIP 420223	420223	10.18730/40SE	DLP 2220	Zapallo		Peru	Ancash	LandRace	9.05 S	77.50 W	2202	y
CIP 420224	420224	10.18730/40TF	DLP 2226	Senorita		Peru	Ancash	LandRace	9.05 S	77.46 W	2710
CIP 420225	420225	10.18730/40VG	DLP 2231	Llacu		Peru	Ancash	LandRace	9.10 S	77.50 W	2466	y	y
CIP 420226	420226	10.18730/40WH	DLP 2232	Centeno		Peru	Ancash	LandRace	9.10 S	77.50 W	2466	y	y
CIP 420227	420227	10.18730/40XJ	DLP 2241	Manza China		Peru	Ancash	LandRace	9.05 S	77.10 W	2876
CIP 420228	420228	10.18730/40YK	DLP 2244	Negro		Peru	Ancash	LandRace	9.05 S	77.10 W	2876	y	y
CIP 420229	420229	10.18730/40ZM	DLP 2251	Rosada		Peru	Lima	LandRace	11.30 S	77.20 W	228	y	y
CIP 420230	420230	10.18730/410N	DLP 2257	Amarillo		Peru	Lima	LandRace	11.30 S	77.20 W	320	y	y
CIP 420231	420231	10.18730/411P	DLP 2264	Blanco		Peru	Lima	LandRace	11.30 S	77.15 W	320
CIP 420232	420232	10.18730/412Q	DLP 2283	Negro		Peru	Lima	LandRace	11.25 S	77.10 W	188
CIP 420233	420233	10.18730/413R	DLP 2292	unknown		Peru	Ancash	LandRace	9.05 S	77.10 W	2215
CIP 420234	420234	10.18730/414S	DLP 2295	Blanco		Peru	Ancash	LandRace	9.05 S	77.10 W	2215	y
CIP 420235	420235	10.18730/415T	DLP 2297	Costena		Peru	Ancash	LandRace	9.04 S	77.50 W	1231	y
CIP 420236	420236	10.18730/416V	DLP 2300	Blanco		Peru	Ancash	LandRace	9.06 S	77.50 W	1231
CIP 420237	420237	10.18730/417W	DLP 2304	Huaracina		Peru	Ancash	LandRace	9.06 S	77.50 W	1231
CIP 420238	420238	10.18730/418X	DLP 2305	Santa Manza		Peru	Ancash	LandRace	9.06 S	77.48 W	2219
CIP 420239	420239	10.18730/419Y	DLP 2344	unknown		Peru	Lima	LandRace	12.55 S	76.15 W	480	y	y
CIP 420240	420240	10.18730/41AZ	DLP 2349	Pepinillo		Peru	Lima	LandRace	13.00 S	76.17 W	300
CIP 420241	420241	10.18730/41B*	DLP 2360	unknown		Peru	Ica	LandRace	13.55 S	75.50 W	482	y
CIP 420242	420242	10.18730/41C~	DLP 2385	unknown		Peru	Ica	LandRace	14.50 S	74.55 W	510
CIP 420243	420243	10.18730/41D$	DLP 2388	unknown		Peru	Ica	LandRace	14.52 S	74.55 W	510
CIP 420244	420244	10.18730/41E=	DLP 2403	Benito		Peru	Huánuco	LandRace	9.50 S	76.20 W	2712
CIP 420245	420245	10.18730/41FU	DLP 2404	Chuluquino		Peru	Huánuco	LandRace	9.50 S	76.20 W	2712
CIP 420246	420246	10.18730/41G0	DLP 2412	Lucuma		Peru	Huánuco	LandRace	10.15 S	76.15 W	1919	y	y
CIP 420247	420247	10.18730/41H1	DLP 2417	Limeno		Peru	Huánuco	LandRace	9.50 S	76.10 W	2418
CIP 420248	420248	10.18730/41J2	DLP 2448	Dulce		Peru	Amazonas	LandRace	5.44 S	78.10 W	532	y	y
CIP 420249	420249	10.18730/41K3	DLP 2458	Norteno		Peru	San Martín	LandRace	6.55 S	76.25 W	218	y	y
CIP 420250	420250	10.18730/41M4	DLP 2462	unknown		Peru	San Martín	LandRace	7.15 S	76.40 W	278	y	y
CIP 420251	420251	10.18730/41N5	DLP 2468	Morado		Peru	San Martín	LandRace	7.50 S	76.46 W	300
CIP 420252	420252	10.18730/41P6	DLP 2469	unknown		Peru	San Martín	LandRace	7.05 S	76.30 W	706
CIP 420253	420253	10.18730/41Q7	DLP 2487	unknown		Peru	San Martín	LandRace	6.02 S	76.58 W	878
CIP 420254	420254	10.18730/41R8	DLP 2495	De Sal		Peru	San Martín	LandRace	6.14 S	76.40 W	868
CIP 420255	420255	10.18730/41S9	DLP 2501	Dulce		Peru	San Martín	LandRace	5.55 S	77.34 W	857	y	y
CIP 420256	420256	10.18730/41TA	DLP 2536	unknown		Peru	Amazonas	LandRace	6.14 S	77.58 W	501	y	y
CIP 420257	420257	10.18730/41VB	DLP 2788	Camote Blanco		Peru	Cusco	LandRace	12.36 S	72.44 W	1426
CIP 420258	420258	10.18730/41WC	DLP 3025	unknown		Peru	Arequipa	LandRace	15.50 S	74.15 W	1619	y
CIP 420259	420259	10.18730/41XD	DLP 3028	Morado		Peru	Tacna	LandRace	18.10 S	70.15 W	367
CIP 420260	420260	10.18730/41YE	DLP 3041	Colorado		Peru	Tacna	LandRace	17.30 S	70.30 W	510
CIP 420261	420261	10.18730/41ZF	DLP 3054	unknown		Peru	Arequipa	LandRace	17.05 S	71.50 W	139	y	y
CIP 420262	420262	10.18730/420G	DLP 3068	Blanco		Peru	Arequipa	LandRace	16.18 S	72.20 W	496	y
CIP 420263	420263	10.18730/421H	DLP 3069	unknown		Peru	Arequipa	LandRace	16.18 S	72.20 W	496
CIP 420264	420264	10.18730/422J	DLP 3086	unknown		Peru	Ica	LandRace	13.35 S	75.45 W	507
CIP 420266	420266	10.18730/424M	DLP 3153	Pierna Senora		Peru	Piura	LandRace	4.37 S	80.13 W	427	y	y
CIP 420267	420267	10.18730/425N	DLP 3159	Camote Morado		Peru	Piura	LandRace	4.37 S	80.11 W	378
CIP 420268	420268	10.18730/426P	DLP 3162	Camote Cuarentena		Peru	Piura	LandRace	4.40 S	80.09 W	366	y	y
CIP 420269	420269	10.18730/427Q	DLP 3163	Napa		Peru	Piura	LandRace	4.37 S	80.13 W	377
CIP 420270	420270	10.18730/428R	DLP 3171	Camote Papa		Peru	Piura	LandRace	4.52 S	80.35 W	65	y	y
CIP 420271	420271	10.18730/429S	DLP 3173	Bejuco		Peru	Piura	LandRace	4.44 S	80.38 W	16	y	y
CIP 420272	420272	10.18730/42AT	DLP 3292	unknown		Peru	Ancash	LandRace	8.30 S	78.04 W	1932
CIP 420273	420273	10.18730/42BV	DLP 3293	Camote Papa		Peru	Ancash	LandRace	8.30 S	78.04 W	1932	y	y
CIP 420274	420274	10.18730/42CW	DLP 3310	Blanco		Peru	Ancash	LandRace	8.33 S	78.06 W	1476
CIP 420275	420275	10.18730/42DX	DLP 3311	Zapallo		Peru	Ancash	LandRace	8.33 S	78.06 W	1476
CIP 420276	420276	10.18730/42EY	DLP 3313	unknown		Peru	Ancash	LandRace	8.33 S	78.06 W	1367
CIP 420277	420277	10.18730/42FZ	DLP 3378	unknown		Peru	Piura	LandRace	5.20 S	80.41 W	159	y
CIP 420278	420278	10.18730/42G*	DLP 3379	unknown		Peru	Piura	LandRace	5.20 S	80.41 W	159
CIP 420279	420279	10.18730/42H~	DLP 3380	unknown		Peru	Piura	LandRace	5.20 S	80.41 W	159	y	y
CIP 420280	420280	10.18730/42J$	DLP 3383	Saucees		Peru	Piura	LandRace	5.10 S	80.39 W	80	y	y
CIP 420281	420281	10.18730/42K=	DLP 3411	Sausa		Peru	Piura	LandRace	4.37 S	80.25 W	65	y	y
CIP 420282	420282	10.18730/42MU	DLP 3414	Esperate Para La Merienda		Peru	Piura	LandRace	4.37 S	80.25 W	65	y	y
CIP 420283	420283	10.18730/42N0	DLP 3417	Trujillano		Peru	Piura	LandRace	5.14 S	80.43 W	50
CIP 420284	420284	10.18730/42P1	DLP 3425	Amarillo		Peru	Piura	LandRace	5.18 S	80.44 W	19
CIP 420285	420285	10.18730/42Q2	DLP 3434	unknown		Peru	Piura	LandRace	4.40 S	80.32 W	348	y
CIP 420286	420286	10.18730/42R3	DLP 3436	unknown		Peru	Piura	LandRace	4.44 S	80.31 W	233	y	y
CIP 420287	420287	10.18730/42S4	DLP 3442	Pedro		Peru	Piura	LandRace	5.20 S	80.44 W	3	y
CIP 420288	420288	10.18730/42T5	DLP 3451	Morado		Peru	Piura	LandRace	5.28 S	80.45 W	13
CIP 420289	420289	10.18730/42V6	DLP 3465	San Luis		Peru	Ancash	LandRace	9.12 S	79.20 W	257	y	y
CIP 420290	420290	10.18730/42W7	DLP 3491	Morado		Peru	La Libertad	LandRace	8.14 S	76.08 W	2728
CIP 420291	420291	10.18730/42X8	DLP 3549	unknown		Peru	Pasco	LandRace	10.04 S	75.33 W	1285
CIP 420292	420292	10.18730/42Y9	DLP 3564	Morado		Peru	Pasco	LandRace	10.35 S	75.24 W	1810
CIP 420293	420293	10.18730/42ZA	DLP 3917	unknown		Peru	Cajamarca	LandRace	5.34 S	78.48 W	709
CIP 420295	420295	10.18730/431C	DLP 3941	unknown		Peru	San Martín	LandRace	6.01 S	77.10 W	822	y	y
CIP 420296	420296	10.18730/432D	EEAC 66	Rinion	19900415	Peru	Lima	LandRace	13.00 S	76.30 W	30
CIP 420298	420298	10.18730/433E	EECH 41	Delicia	19870420	Peru	Ica	LandRace	13.30 S	76.20 W	105	y	y
CIP 420299	420299	10.18730/434F	EEY 2	Juan De Dios 1-Yurimaguas	19880601	Peru	Loreto	LandRace	5.53 S	8.24 W	140	y	y
CIP 420300	420300	10.18730/435G	RCB IN- 6	De Sal	19850927	Peru		Landrace				y	y
CIP 420301	420301	10.18730/436H	RCB IN- 7	Italiano Plomo	19850927	Peru	Lima	Landrace	12.00 S	77.00 W	246
CIP 420302	420302	10.18730/437J	RCB IN- 9	Chancleta	19850927	Peru	Lima	Landrace	12.00 S	77.00 W	246
CIP 420303	420303	10.18730/438K	RCB IN- 12	Yema de Huevo	19850927	Peru	Lima	Landrace	12.00 S	77.00 W	45	y	y
CIP 420304	420304	10.18730/439M	RCB IN- 13	De Yuca	19850927	Peru	Lima	Landrace	12.00 S	77.00 W	45	y	y
CIP 420305	420305	10.18730/43AN	RCB IN- 16	Lirio	19850927	Peru	Arequipa	Landrace	17.00 S	73.00 W	18	y	y
CIP 420306	420306	10.18730/43BP	RCB IN- 24	Sauce	19850927	Peru	Lima	Landrace	12.00 S	77.00 W	163	y	y
CIP 420307	420307	10.18730/43CQ	RCB IN- 28	San Pedrano	19850927	Peru	La Libertad	Landrace	7.00 S	79.00 W	135
CIP 420308	420308	10.18730/43DR	RCB IN- 31	Santa Rosa	19850927	Peru	Lima	Landrace	11.30 S	77.00 W	66
CIP 420309	420309	10.18730/43ES	RCB IN- 32	Chinchano	19850927	Peru	Ica	Landrace	15.00 S	75.30 W	454
CIP 420310	420310	10.18730/43FT	RCB IN- 40	Copara #2	19850927	Peru	Ica	Landrace	15.00 S	75.00 W	588
CIP 420311	420311	10.18730/43GV	RCB IN- 49	Oreja de Galgo Blanco	19850927	Peru	Ica	Landrace	15.00 S	76.30 W	590
CIP 420312	420312	10.18730/43HW	RCB IN- 55	Negro	19850927	Peru	Lima	Landrace	13.00 S	76.30 W	108
CIP 420313	420313	10.18730/43JX	RCB IN- 63	Parendero Blanco	19850927	Peru	Lima	Landrace	13.00 S	76.30 W	108
CIP 420314	420314	10.18730/43KY	RCB IN- 66	Rinon	19850927	Peru	Lima	Landrace	13.00 S	76.30 W	108
CIP 420315	420315	10.18730/43MZ	RCB IN- 67	Negro Pepe	19850927	Peru	Lima	Landrace	13.00 S	76.30 W	108
CIP 420316	420316	10.18730/43N*	RCB IN- 78	Lorinero	19850927	Peru	Lima	Landrace	13.00 S	76.00 W	156	y
CIP 420317	420317	10.18730/43P~	RCB IN- 80	Morado De Huaura	19850927	Peru	Lima	Landrace	11.00 S	78.00 W	66	y	y
CIP 420318	420318	10.18730/43Q$	RCB IN- 91	Morado De Viru	19850927	Peru	La Libertad	Landrace	8.00 S	79.00 W	75	y	y
CIP 420319	420319	10.18730/43R=	RCB IN- 93	Quitas Penas	19850927	Peru	Tumbes	Landrace	3.30 S	80.30 W	8
CIP 420320	420320	10.18730/43SU	RCB IN- 97	Zapallo de Huara	19850927	Peru	Lima	Landrace	11.00 S	78.00 W	66
CIP 420321	420321	10.18730/43T0	RCB IN-103	Morado de Canete	19850927	Peru	Lima	Landrace	13.00 S	76.30 W	7	y	y
CIP 420322	420322	10.18730/43V1	RCB IN-104	Pepino de Canete	19850927	Peru	Lima	Landrace	13.00 S	76.30 W	7
CIP 420323	420323	10.18730/43W2	RCB IN-111	Ribereno	19850927	Peru	Piura	Landrace	5.00 S	81.00 W		y	y
CIP 420324	420324	10.18730/43X3	RCB IN-114	Amarillo de Rinconada	19900415	Peru	Lima	LandRace	13.00 S	76.30 W	30	y	y
CIP 420325	420325	10.18730/43Y4	RCB IN-117	Locro	19850927	Peru	Tumbes	Landrace	3.30 S	80.30 W	8
CIP 420326	420326	10.18730/43Z5	RCB IN-120	Guiador	19850927	Peru	Lima	Landrace	13.00 S	76.00 W	5
CIP 420327	420327	10.18730/4406	RCB IN-121	Chancleta de Cochahuasi	19850927	Peru	Lima	Landrace	13.00 S	76.00 W	5	y	y
CIP 420328	420328	10.18730/4417	RCB IN-125	Empuercamano Amarillo	19850927	Peru	Arequipa	Landrace	16.00 S	71.30 W	2334	y	y
CIP 420329	420329	10.18730/4428	RCB IN-127	Tucapel	19850927	Peru	Arequipa	Landrace	16.00 S	71.30 W	2334
CIP 420330	420330	10.18730/4439	RCB IN-130	Precolombino de Paracas	19850927	Peru	Ica	Landrace	14.00 S	76.00 W	5
CIP 420331	420331	10.18730/444A	RCB IN-131	Sanguinario	19850927	Peru	Ica	Landrace	14.00 S	76.30 W	408
CIP 420332	420332	10.18730/445B	RCB IN-132	Chileno de Calidad	19850927	Peru	Ica	Landrace	14.00 S	76.30 W	408	y
CIP 420333	420333	10.18730/446C	RCB IN-133	Limeno de Ica	19850927	Peru	Ica	Landrace	14.00 S	76.30 W	408
CIP 420334	420334	10.18730/447D	RCB IN-135	Zapallo Cuzqueno	19850927	Peru	Cusco	Landrace	13.00 S	73.00 W	1153	y	y
CIP 420335	420335	10.18730/448E	RCB IN-139	Bisambra	19850927	Peru	Ica	Landrace	15.00 S	75.00 W	590
CIP 420336	420336	10.18730/449F	RCB IN-142	Aragon	19850927	Peru	Cusco	Landrace	13.00 S	73.00 W	3488
CIP 420337	420337	10.18730/44AG	RCB IN-150	Blanco De Huaura	19850927	Peru	Lima	Landrace	11.00 S	78.00 W	66
CIP 420338	420338	10.18730/44BH	RCB IN-151	Amarillo de Chiclayo	19850927	Peru	Lambayeque	Landrace	7.00 S	80.00 W	33
CIP 420339	420339	10.18730/44CJ	RCB IN-159	Sangriento	19850927	Peru	La Libertad	Landrace	8.00 S	79.00 W	75
CIP 420340	420340	10.18730/44DK	RCB IN-164	X-canete	19850927	Peru	Lima	Landrace	13.00 S	76.30 W	7	y	y
CIP 420341	420341	10.18730/44EM	RCB IN-165	Juan Ruiz	19850927	Peru	Lima	Landrace	13.00 S	76.30 W	48
CIP 420342	420342	10.18730/44FN	RCB IN-169	Blanco De Poroto	19850927	Peru	La Libertad	Landrace	8.00 S	79.00 W	35	y	y
CIP 420343	420343	10.18730/44GP	RCB IN-178	Morado De Tacna	19850927	Peru	Tacna	Landrace	18.00 S	70.00 W	564
CIP 420344	420344	10.18730/44HQ	RCB IN-179	Hoja Lamida	19850927	Peru	Lima	Landrace	13.00 S	76.00 W	480
CIP 420345	420345	10.18730/44JR	RCB IN-182	Blanco De Huancaquito	19850927	Peru	La Libertad	Landrace	8.00 S	79.00 W	75
CIP 420346	420346	10.18730/44KS	RCB IN-184	Sauce Huancaquito	19850927	Peru	La Libertad	Landrace	8.00 S	79.00 W	75	y	y
CIP 420347	420347	10.18730/44MT	RCB IN-185	Chancleta Amarillo	19850927	Peru	La Libertad	Landrace	8.00 S	79.00 W	75
CIP 420348	420348	10.18730/44NV	RCB IN-192	Blanco Local	19850927	Peru	Lambayeque	Landrace	7.00 S	80.00 W	19
CIP 420349	420349	10.18730/44PW	RCB IN-194	Papa	19850927	Peru	Lambayeque	Landrace	7.00 S	80.00 W	19	y	y
CIP 420350	420350	10.18730/44QX	RCB IN-197	Peludo	19850927	Peru	Arequipa	Landrace	15.30 S	74.30 W	155	y	y
CIP 420351	420351	10.18730/44RY	RCB IN-198	Blanco de Acari	19850927	Peru	Arequipa	Landrace	15.30 S	74.30 W	155
CIP 420352	420352	10.18730/44SZ	RCB IN-199	Chancleta Morado	19850927	Peru	Lima	Landrace	12.30 S	76.30 W	13
CIP 420353	420353	10.18730/44T*	RCB IN-201	Chancleta Blco D Callalla	19850927	Peru	Lima	Landrace	13.00 S	76.30 W	29	y	y
CIP 420355	420355	10.18730/44W$	RCB IN-239	Roldan	19850927	Peru	Lima	Landrace	13.00 S	76.00 W	17
CIP 420356	420356	10.18730/44X=	RCB IN-243	Bejuco	19850927	Peru	Piura	Landrace	5.00 S	81.00 W	36	y	y
CIP 420357	420357	10.18730/44YU	RCB IN-248	Dos En Uno	19900415	Peru	Lima	Landrace	13.00 S	76.30 W	30	y	y
CIP 420358	420358	10.18730/44Z0	RCB IN-252	Jacallino	19850927	Peru	Lima	Landrace	13.00 S	76.00 W	640
CIP 420359	420359	10.18730/4501	RCB IN-256	Cascajo	19850927	Peru	Lima	Landrace	11.00 S	78.00 W	66
CIP 420360	420360	10.18730/4512	RCB IN-259	Romero	19850927	Peru	Lima	Landrace	11.00 S	78.00 W	52	y	y
CIP 420361	420361	10.18730/4523	RCB IN-261	Pativilcano	19850927	Peru	Lima	Landrace	11.00 S	78.00 W	18	y	y
CIP 420362	420362	10.18730/4534	RCB IN-264	Culebrero # 2	19850927	Peru	Ancash	Landrace	10.00 S	78.00 W
CIP 420363	420363	10.18730/P7EK1	UNJBG 9	Chancleta de Chilca	19951010	Peru	Tacna	Landrace			564
CIP 420364	420364	10.18730/4545	ARB 81	Camote Blanco	19850309	Peru	Huancavelica	LandRace			4036	y	y
CIP 420365	420365	10.18730/4556	ARB 82	Camote Morado	19850309	Peru	Huancavelica	LandRace			4036	y	y
CIP 420367	420367	10.18730/4578	ARB 89	Camote Blanco	19850309	Peru	Junín	LandRace			801	y	y
CIP 420368	420368	10.18730/4589	ARB 90	Camote Morado Oscuro	19850309	Peru	Junín	LandRace			801	y	y
CIP 420369	420369	10.18730/459A	ARB 97	Camote	19850309	Peru	Junín	LandRace			623	y	y
CIP 420370	420370	10.18730/45AB	ARB 110	Camote	19850309	Peru	Pasco	LandRace			1558	y
CIP 420372	420372	10.18730/45BC	ARB 113	Camote Blanco	19850309	Peru	Pasco	LandRace			1500	y	y
CIP 420373	420373	10.18730/45CD	ARB 115	Camote	19850309	Peru	Pasco	LandRace			2916
CIP 420374	420374	10.18730/45DE	ARB 119	Camote Amarillo	19850309	Peru	Pasco	LandRace			1810
CIP 420378	420378	10.18730/45HJ	ARB 139	Aurinsha	19850309	Peru	Huánuco	LandRace			1981	y
CIP 420379	420379	10.18730/45JK	ARB 142	Camote Rosado	19850309	Peru	Huánuco	LandRace			2809
CIP 420380	420380	10.18730/45KM	ARB 143	Camote Del Monte	19850309	Peru	Huánuco	LandRace			1524	y	y
CIP 420381	420381	10.18730/45MN	ARB 145	Camote Amarillo	19850309	Peru	Ucayali	LandRace			815
CIP 420382	420382	10.18730/45NP	ARB 150	unknown	19850309	Peru	Huánuco	LandRace			628
CIP 420383	420383	10.18730/45PQ	ARB 151	Camote Colorado	19850309	Peru	San Martín	LandRace			430	y
CIP 420385	420385	10.18730/45QR	ARB 156	Camote Blanco Dulce	19850309	Peru	Amazonas	LandRace			2382
CIP 420386	420386	10.18730/45RS	ARB 158	Acaro	19850309	Peru	Amazonas	LandRace			2382	y	y
CIP 420387	420387	10.18730/45ST	ARB 160	Amarillo Criollo	19850309	Peru	Amazonas	LandRace			2382	y	y
CIP 420388	420388	10.18730/45TV	ARB 162	Amarillo Grande	19850309	Peru	Amazonas	LandRace			2382
CIP 420391	420391	10.18730/45XY	ARB 165	Chiuche	19850309	Peru	Amazonas	LandRace			2382
CIP 420393	420393	10.18730/45Z*	ARB 168	Camote Mavila	19850309	Peru	Amazonas	LandRace			2382
CIP 420394	420394	10.18730/460~	ARB 169	Amarilloso Criollo Dulce	19850309	Peru	Amazonas	LandRace			2382
CIP 420395	420395	10.18730/461$	ARB 178	Camote Rosadito	19850309	Peru	Cajamarca	LandRace			568	y	y
CIP 420396	420396	10.18730/462=	ARB 180	Camote	19850309	Peru	Cajamarca	LandRace			1517	y	y
CIP 420398	420398	10.18730/4640	ARB 184	Camote Blanco	19850309	Peru	Amazonas	LandRace			536	y	y
CIP 420399	420399	10.18730/4651	ARB 192	Camote Chipana	19850309	Peru	Amazonas	LandRace			2082	y	y
CIP 420400	420400	10.18730/4662	ARB 194	Camote Pancho	19850309	Peru	Amazonas	LandRace			2192	y	y
CIP 420402	420402	10.18730/4684	ARB 196	Camote Aguilar	19850309	Peru	Amazonas	LandRace			2192	y	y
CIP 420403	420403	10.18730/4695	ARB 198	Camote Rojo	19850309	Peru	Amazonas	LandRace			2053	y	y
CIP 420405	420405	10.18730/46B7	ARB 202	Camote Morado Zapallo	19850309	Peru	Amazonas	LandRace			1620	y	y
CIP 420406	420406	10.18730/46C8	ARB 202a	Camote Morado Zapallo	19850309	Peru	Amazonas	LandRace			1620	y	y
CIP 420407	420407	10.18730/46D9	ARB 203	Camote Yema De Huevo	19850309	Peru	Amazonas	LandRace			1620	y	y
CIP 420408	420408	10.18730/46EA	ARB 203a	Camote Yema De Huevo	19850309	Peru	Amazonas	LandRace			1620	y	y
CIP 420409	420409	10.18730/46FB	ARB 210	Blanco Chanchillo	19850309	Peru	Amazonas	LandRace			1620	y	y
CIP 420411	420411	10.18730/46HD	ARB 216	Camote Rosado	19850309	Peru	Amazonas	LandRace			2338	y	y
CIP 420413	420413	10.18730/46KF	ARB 222	Camote Morado	19850309	Peru	Amazonas	LandRace			2780	y	y
CIP 420414	420414	10.18730/46MG	ARB 223	Camote Chancaina	19850309	Peru	Amazonas	LandRace			2780	y	y
CIP 420416	420416	10.18730/46PJ	ARB 226	Camote Locre	19850309	Peru	Amazonas	LandRace			2780	y	y
CIP 420417	420417	10.18730/46QK	ARB 227	Camote Amarillo	19850309	Peru	Amazonas	LandRace			2780
CIP 420418	420418	10.18730/46RM	ARB 229	Camote Pan	19850309	Peru	Cajamarca	LandRace			2188	y	y
CIP 420419	420419	10.18730/46SN	ARB 234	Camote Colorado	19850309	Peru	Cajamarca	LandRace			2188
CIP 420422	420422	10.18730/46WR	ARB 239	Camote Morado	19850309	Peru	Cajamarca	LandRace			2534
CIP 420423	420423	10.18730/46XS	ARB 240	Camote De Sal Chilpe	19850309	Peru	Cajamarca	LandRace			2534	y
CIP 420424	420424	10.18730/46YT	ARB 243	Camote Morado	19850309	Peru	Cajamarca	LandRace			2473	y
CIP 420425	420425	10.18730/46ZV	ARB 244	Camote Chilpe Muchacho	19850309	Peru	Cajamarca	LandRace			2473	y
CIP 420426	420426	10.18730/470W	ARB 245	Camote Lucmeño De Sal	19850309	Peru	Cajamarca	LandRace			2495	y	y
CIP 420427	420427	10.18730/471X	ARB 246	Camote Blanco Dulce	19850309	Peru	Cajamarca	LandRace			2495	y	y
CIP 420429	420429	10.18730/473Z	ARB 249	Camote Rosado	19850309	Peru	Cajamarca	LandRace			2495	y
CIP 420430	420430	10.18730/474*	ARB 250	Camote Amarillo	19850309	Peru	Cajamarca	LandRace			2495	y	y
CIP 420431	420431	10.18730/P7GT=	ARB 251	Camote de Burro	19850309	Peru	Cajamarca	LandRace			2032	y
CIP 420432	420432	10.18730/475~	ARB 253	Camote Hualangueno	19850309	Peru	Cajamarca	LandRace			2032	y	y
CIP 420433	420433	10.18730/476$	ARB 255	Camote Chaucha	19850309	Peru	Cajamarca	LandRace			2032	y	y
CIP 420435	420435	10.18730/477=	ARB 261	Camote Mano	19850309	Peru	Cajamarca	LandRace			2000	y	y
CIP 420436	420436	10.18730/478U	ARB 262	Camote Amarillo Costeno	19850309	Peru	Cajamarca	LandRace			2000	y	y
CIP 420437	420437	10.18730/4790	ARB 263	Camote Chukil	19850309	Peru	Cajamarca	LandRace			1832	y	y
CIP 420438	420438	10.18730/47A1	ARB 264	Camote Sinchimachino	19850309	Peru	Cajamarca	LandRace			1832	y	y
CIP 420439	420439	10.18730/47B2	ARB 265	Camote Calabacito	19850309	Peru	Cajamarca	LandRace			2000
CIP 420440	420440	10.18730/47C3	ARB 266	Camote Satadito	19850309	Peru	Cajamarca	LandRace			2000
CIP 420441	420441	10.18730/47D4	ARB 267	Camote Chilpe Rosadito	19850309	Peru	Cajamarca	LandRace			2000	y	y
CIP 420442	420442	10.18730/47E5	ARB 269	Camote Morado	19850309	Peru	Cajamarca	LandRace			1922	y	y
CIP 420443	420443	10.18730/47F6	ARB 273	Munana	19850309	Peru	Cajamarca	LandRace			1922
CIP 420445	420445	10.18730/47H8	ARB 287	Shikra Toro	19850309	Peru	Cajamarca	LandRace			1669	y	y
CIP 420446	420446	10.18730/47J9	ARB 290	Camote Rompe Alforja	19850309	Peru	Cajamarca	LandRace			1669	y	y
CIP 420447	420447	10.18730/47KA	ARB 293	Pan Camote	19850309	Peru	Cajamarca	LandRace			1669	y	y
CIP 420448	420448	10.18730/47MB	ARB 295	Camote San Lorenzo	19850309	Peru	Cajamarca	LandRace			2306	y	y
CIP 420449	420449	10.18730/47NC	ARB 297	Camote Mundo Nuevo	19850309	Peru	Cajamarca	LandRace			2306
CIP 420451	420451	10.18730/47QE	ARB 299	Camote Morado	19850309	Peru	Cajamarca	LandRace			2306	y
CIP 420453	420453	10.18730/47SG	ARB 301	Camote Burro	19850309	Peru	Cajamarca	LandRace			2306	y
CIP 420454	420454	10.18730/47TH	ARB 308	Camote Morado	19850309	Peru	Cajamarca	LandRace			2209
CIP 420455	420455	10.18730/47VJ	ARB 317	Camote Amarillo	19850309	Peru	Lima	LandRace			1638	y	y
CIP 420456	420456	10.18730/47WK	ARB 318	Amarillo Yema de Huevo	19850309	Peru	Lima	LandRace			1638	y	y
CIP 420457	420457	10.18730/47XM	ARB 321	Waqchacullay	19850309	Peru	Lima	LandRace			1638	y	y
CIP 420458	420458	10.18730/47YN	ARB 335	unknown	19850309	Peru	Lima	LandRace			1108
CIP 420459	420459	10.18730/47ZP	ARB 337	Cascajo	19850309	Peru	Lima	LandRace			839
CIP 420460	420460	10.18730/480Q	ARB 342	Juancho	19850309	Peru	Ancash	LandRace			2804	y	y
CIP 420461	420461	10.18730/481R	ARB 343	Yema de Huevo	19850309	Peru	Ancash	LandRace			2804
CIP 420462	420462	10.18730/482S	ARB 348	Camote Morado	19850309	Peru	Lima	LandRace			958
CIP 420463	420463	10.18730/483T	ARB 351	Camotin	19850309	Peru	Lima	LandRace			1100
CIP 420464	420464	10.18730/484V	ARB 352	Camote Blanco o Racacha	19850309	Peru	Lima	LandRace			1100	y	y
CIP 420465	420465	10.18730/485W	ARB 358	Camote	19850309	Peru	Ancash	LandRace			1330
CIP 420466	420466	10.18730/486X	ARB 364	Camote Juancho	19850309	Peru	Ancash	LandRace			1330
CIP 420467	420467	10.18730/487Y	ARB 367	Camote Nino	19850309	Peru	Ancash	LandRace			1285	y
CIP 420468	420468	10.18730/488Z	ARB 369	Camote Shawanka	19850309	Peru	Ancash	LandRace			1285	y	y
CIP 420469	420469	10.18730/489*	ARB 372	Limenito	19850309	Peru	Ancash	LandRace			1285	y	y
CIP 420470	420470	10.18730/48A~	ARB 374	Tabon Amarillo	19850309	Peru	Ancash	LandRace			1285	y
CIP 420471	420471	10.18730/48B$	ARB 375	Chilpo Colorado	19850309	Peru	Ancash	LandRace			1285
CIP 420472	420472	10.18730/48C=	ARB 376	Camote Mas Chacra	19850309	Peru	Ancash	LandRace			1285	y	y
CIP 420473	420473	10.18730/48DU	ARB 378	Camote Chilpo Blanco	19850309	Peru	Ancash	LandRace			1285
CIP 420474	420474	10.18730/48E0	ARB 382	Camote Piquichon	19850309	Peru	Ancash	LandRace			1285	y	y
CIP 420475	420475	10.18730/48F1	ARB 386	Camote Limenito	19850309	Peru	Ancash	LandRace			1285
CIP 420476	420476	10.18730/48G2	ARB 389	Camote Yema De Huevo	19850309	Peru	Ancash	LandRace			1285
CIP 420477	420477	10.18730/48H3	ARB 391	Camote Perico	19850309	Peru	Ancash	LandRace			1285	y	y
CIP 420478	420478	10.18730/48J4	ARB 397	Burdillo	19850309	Peru	Ancash	LandRace			1775	y
CIP 420479	420479	10.18730/48K5	ARB 398	Otkosh Blanco	19850309	Peru	Ancash	LandRace			1775	y
CIP 420480	420480	10.18730/48M6	ARB 399	Kuchi Camote	19850309	Peru	Ancash	LandRace			1775
[truncated: 3,980 more rows]
