# Supplementary material for: Genetic Identity, Diversity, and Population Structure of CIP's Sweetpotato (I. batatas) Germplasm Collection
Source: Front Plant Sci. 2021 Oct 28;12:660012. doi: 10.3389/fpls.2021.660012 (PMC8589021; doi:10.3389/fpls.2021.660012)
Supplement: Supplementary file 7 [file Table_2.XLSX]

## Sheet: Sheet1
Abees	PI 633446
ACADIAN	PI 566609
Agena	PI 641933
Akaio	PI 634512
ALLGOLD	PI 566610
ANARANJADO INTE	PI 612688
APACHE	PI 566611
AVRDC-CN 1732-4	PI 633964
BAKER	PI 566612
BEAUREGARD	PI 566613
BEERWAH GOLD	PI 599394
Benikomachi	PI 633447
Camote Negro	PI 599383
Camote Rosita	PI 612694
CAMOTE TALLO	PI 612691
CAMOTE YUCA	PI 612690
CAROGOLD	PI 566615
CAROLINA NUGGET	PI 566616
CAROLINA RUBY	PI 628761
CAROMEX	PI 566617
CARVER	PI 566618
Cascajo Morado	PI 633989
CEMSA 78-326	PI 606276
CENTENNIAL	PI 566619
Charleston Scarlet	PI 653843
CHEROKEE	PI 566620
CIP 420024	PI 612689
CN 1421-56	PI 634514
CN 1421-68	PI 634513
CN 1424-9	PI 633963
CN 1448-49	PI 612700
CN 1747-88	PI 612702
CN 1869-13	PI 595929
Comensal	PI 633444
CORDNER	PI 566622
COSTENO	PI 612693
DARBY	PI 595199
EUREKA	PI 566624
EXCEL	PI 566625
Florida	PI 16175
GA90-16	PI 612703
GEORGIA JET	PI 566627
GEORGIA RED	PI 566628
GOLDRUSH	PI 566630
HAYMAN	PI 634379
HEARTOGOLD	PI 566631
Helena	PI 606268
HELENA	PI 612696
HERNANDEZ	PI 566632
HIDRY	PI 566633
HOPI	PI 566634
Huachano	PI 612695
Huarmeyano	PI 595874
IITA-TIB 10	PI 595876
IITA-TIS 2544	PI 595882
IITA-TIS 3290	PI 595883
IITA-TIS 83/1038	PI 633984
IITA-TIS 9101	PI 599385
IITA-TIS 9232	PI 595885
IMBY 3102	PI 595880
JASPER	PI 566636
JERSEY ORANGE	PI 566637
JEWEL	PI 566638
JULIAN	PI 566639
Kawogo	PI 612675
KEMB 10	PI 595890
KEMB 37	PI 595891
KOKEI NO14	PI 614800
Kyukei No. 63	PI 633965
Kyushu No.100	PI 633448
L 86-33	PI 670014
LIBERTY	PI 653844
LM 87.045	PI 612685
LM 88.014	PI 612686
LUBY 3074	PI 595879
MAN LOBOR	PI 612701
MARIA ANGOLA	PI 606264
MD 15-63	PI 634465
MD 16-109	PI 634468
MD 16-50	PI 634467
MD 16-8	PI 634466
MD 17-340	PI 634469
MD 253	PI 634475
MD 320	PI 634476
MD 55	PI 634470
MD 607	PI 634477
MD 7-93	PI 634463
MD 807	PI 634478
MD 822	PI 634479
MD 844	PI 634480
MD 88-107	PI 634471
MD 88-116	PI 634472
MD 9-35	PI 634464
MD C91	PI 634473
MD P217-84	PI 634474
Minamiyutaka	PI 599386
Mogamba	PI 595878
Molokai Purple	PI 641934
Morado Maravi	PI 633968
MUGANDE	PI 614801
NANCY HALL	PI 566641
Narunmitang	PI 633449
NC 262	PI 612698
NEMAGOLD	PI 566642
NO. 221	PI 636315
No. 29	PI 595889
NON DA HONG	PI 606275
NUGGET	PI 566643
PAINTER	PI 566644
PAPILLA MALA HIEBRA	PI 612692
Pata de Oso	PI 599384
Patriot	PI 634452
Pedro	PI 599382
POPE	PI 566645
PORTO RICO	PI 566646
RED JEWEL	PI 566648
REGAL	PI 566650
RESISTO	PI 566651
ROJO BLANCO	PI 566652
RUDDY	PI 657999
Rusenya-BDI	PI 595877
Rusenya-RWA	PI 595928
Salyboro	PI 633445
SANTO AMARO	PI 612687
SHORE GOLD	PI 566654
SOUTHERN DELITE	PI 566655
SUMOR	PI 566657
SUNNYSIDE	PI 566656
SWEET RED	PI 566658
TAINUNG NO64	PI 614802
Tanzania	PI 595887
TIB 4	PI 599393
TIS 1145	PI 606255
TIS 1499	PI 606253
TIS 2498	PI 599395
TIS 3053	PI 599396
TIS 5081	PI 606269
TIS 5125	PI 606271
TIS 70357	PI 599398
TIS 70683	PI 614797
TIS 80/637	PI 599399
TIS 8164	PI 606277
TIS 82/395	PI 606262
TIS 8266	PI 606270
TIS 83/176	PI 606260
TIS 8401	PI 599397
TIS 8409	PI 606259
TIS 8441	PI 612697
TIS 8504	PI 606267
TIS 8524	PI 606257
TIS 9101	PI 606278
TIS 9265	PI 606258
TIS 9291	PI 606256
TIS 9465	PI 606261
TRAVIS	PI 566660
TSURUNASH-GENJI	PI 612699
UGA-204	PI 634481
UGA-210	PI 634482
UGA-227	PI 634483
UNKNOWN	PI 633988
USDAsin nombre	PI 324887
VARDAMAN	PI 566662
W-228	PI 606265
W-311	PI 666134
W-317	PI 666135
W-332	PI 666136
W-333	PI 666137
W-361	PI 666138
W-376	PI 666139
W-386	PI 666140
W-390	PI 666141
W-392	PI 653845
Wagabolige	PI 633966
Wagabolige	PI 595888
WHITE DELITE	PI 566663
WHITESTAR	PI 566664
WT-108	PI 633987
WT-129	PI 634509
WT-194	PI 634510
WT-237	PI 614798
WT-314	PI 614799
WT-325	PI 633440
WT-478	PI 636313
WT-57	PI 633985
WT-571	PI 636314
WT-59	PI 633986
Xushu 18	PI 595873
YAN SHU 1	PI 606279
Zapallo	PI 595875
